# Supplementary material
Source: ML conference proceedings conference paper supplement (https://aclanthology.org/D19-1484)
Supplement: Attachment [file english-tagalog-500.xlsx]

## Sheet: tagalog-500
Author	Subreddit	Date	confidence	Lang1	Lang2	Text	post id	link id	parent id
JamminJames921	Philippines	1529230294	30	English	Tagalog	Grabe, ang ganda ng Pilipinas sobra; Itג€™s just sad to see whatג€™s happening right nowג€”killings, division, corruption, etc. Ang sakit makita na yung ganitong ganda na-oovershadow ng mga masasamang nangyayari. I really hope na we get to see our country shine in our lifetime. Nandun na yung potential eh, kailangan lang alagaan. Ang ganda ng Pilipinas sobra.	e0tagru	t3_8rnz6o	t3_8rnz6o
NonaGeulis	Philippines	1542164727	47	Tagalog	English	Same. Haha. Ako naman I gave up my writing hobbies na nung nasa college na ako. Balak ko pa nun mag apply as contributor sa school paper nung college pero nadiscourage ako. Ewan ko ba. Ningas-kugon din kasi ako sa pagsusulat. Sa umpisa lang maganda pero pag nasa kalagitnaan na nahihirapan na ako i-sustain.	e9nqj31	t3_9wtkni	t1_e9nk7ix
Bigflatfoot16	Philippines	1489627137	28	Tagalog	English	Cheapest to expensive effective solution? A walkable sidewalk. The reason kaya sumasakay ng jeep ang isang tao kahit less than a kilometer yung pupuntahan niya ay dahil hindi sa gusto niya makarating agad ngunit dahil nakakadiscourage maglakad sa sidewalk na puno ng harang. Hindi na ako umaasa na magkakaroon tayo ng bagong train system in the next 10 years. Hindi na rin ako umaasa mareregulate an…	dezj089	t3_5zk27z	t3_5zk27z
MemoryPH	Philippines	1515820261	35	English	Tagalog	Saan ko naman ilalagay yung aso? Sa labas ng gate or sa loob ng gate? Eh nasa labas at taas yung doorbell so parang useless yung aso. Hahah And we only have a Pug, that will not scare them! It will make them more play with the doorbell if we place our qt pug near the doorbell. Lol נ˜‚	dslx059	t3_7q27an	t1_dslwxvq
cottoncandid	Philippines	1549096910	21	Tagalog	English	Feeling ko to for survival kayo nagchange ako. Ako yung unang member sa team namin at new team rin so ang daming kailangan iprove. Competitive din mga tao na kung hindi ka nagpakitang gilas alis ka. Baka dahil dun kaya feeling ko dapat patunayan din nila yung sarili nila, kasi yon yung nafeel ko nung nagjoin ako. Pero happy naman ako sa work itself, sobrang daming new learnings. I just forgot who…	efkxyd5	t3_amah04	t1_efkxge9
Rothgim	Philippines	1524540247	42	English	Tagalog	Since umaga na kwento ko na yung iba pang stories: ג€¢Mga 2 or 3 years old pa anak ko naglalaro sya sa living room. Normal na kulitan with my in-laws and wife. Tapos bigla syang pumunta sa kitchen which is also my office. Lumakad pa sya papunta sa small kitchen, tapos tumuro sa isang corner and he said *Daddy*. Puzzled my wife checked the small kitchen, Wala syang nakita. Then sinabi nya sa anak …	dxv81hv	t3_8eax9q	t3_8eax9q
theletterv_	Philippines	1530080783	39	Tagalog	English	Forgiving someone is a process na hindi same sa lahat, for you maybe the process was faster. Maybe ask her how you can help? Ano yung sa palagay nya makakatulong for her to forgive you? Baka may expectation sya sayo na hindi nya sinasabi, na pwede nyo pag usapan if kaya ba?	e1d5xzy	t3_8u6hdv	t1_e1d5u1k
scubadance	Philippines	1426726411	35	Tagalog	English	Ayos ha. Tumatawid ako sa may Makati City Hall, sa may ped xing, not breaking any laws here guys, sumasabay pa ako pag may umiintersect na ibang kotse, hindi ko alam tamang tawag. Yung sa unang dalawang lanes, pinagbigyan ako, kahit medyo malapit na sila nagbrake padin. Tas sa third lane, medyo malayo pa yung SUV, nung nakita akong tumatawid, binilisan pa. Fucking hell, guy.	cpjeenq	t3_2zimnp	t3_2zimnp
VirgJR	Philippines	1502643657	31	Tagalog	English	Yun lang ang masagot mo Ma'am/Sir? Hindi ka pa cguro na biktima ng mga low class na meth adik. Mayaman cguro ka at hindi mo na kita ang mga salut sa lipunan. Or anak/kamaganak cguro ka ng isang kurap na opisyal. May secretary cguro ka na naglakad sa mga documents na ang sobra ka tagal ma release, bibilis lang kung may pampadulas. Dati uneasy ako pag umuwi jan sa atin kasi sa laglag bala na yan, a…	dlkedeg	t3_6t8d33	t1_dlkd9ch
paulyarcia	Philippines	1527074811	49	English	Tagalog	End result lang yung makakapanakit sila. Gusto lang din nila sumaya tulad natin. Its just that their way of achieving happiness is at the expense of other people. Walang gusto manakit. At least not directly.	dzfrw64	t3_8li4ji	t1_dzfqsem
ihateannawilliams	Philippines	1548285579	48	English	Tagalog	binibigay ng asawa ko sa kin buong sweldo nya. may allowance sya every sahod for gas at yosi. he doesnt even look at our bank account. basta binibigay nya sahod nya, ako na bahala.	eesxdd4	t3_aj36xb	t3_aj36xb
L30ne	Philippines	1395379770	49	Tagalog	English	Process modernization using computer systems (rigged na bidding para sa may pinakamalaking kickback, syempre) sabay outsource ng mga low-value na positions (same tactic sa bidding, pero service contract ito kaya pwedeng renew lang nang renew). Kung magawa ito ng tahimik, matatabunan lahat yan ng bango ng mabibilis na mga proseso at mas efficient na serbisyo, habang kumikita rin ng panlagay sa mga…	cg82n8u	t3_20ygrv	t1_cg80ean
bestleeanever	Philippines	1497962397	45	English	Tagalog	The best intro ng isang relationship is friendship. Kasi through friendship nikikilala mo yung tao genuinely, lahat ng mababaho at mababango. Pero sa case mo, youve been bestfriends for 7 years na, lumampas na kayo dun sa possibility na pwedeng maging kayo, im pretty sure parang kapatid na turing niyan sayo. And kadiri naman iboyfriend yung kapatid diba? Hehe	dj5dunv	t3_6id1of	t1_dj5co7o
scarethekids	Philippines	1511877348	43	English	Tagalog	Rekta Empi agad para wild. Hahaha joke. Try mo muna beer since di ka pa nakapag try ng kahit anong alak. Again, start with flavoured beers. San Mig Apple/Lemon. Try mo din San Mig Light or Tanduay Ice. Subukan mo din Pale Pilsen kasi eto talaga pinaka swabe na beer for me. Liquor/Hard drinks ata category ng Soju. Mainit ang Soju eh and best sya to partner with Korean food. If you'll explore wine,…	dqgcqt0	t3_7g33tn	t1_dqgaskz
pedromanalastas26	Philippines	1537442438	39	Tagalog	English	It's always good to have a back up kagaya ng anime and mga series. Ako walang back up. Reddit lang nagagawa ko sa ngayon, mabagal pa. Pag bukas ganito parin, mukhang mababasa ko na yung mga librong binili ko sa book sale.	e6b7198	t3_9hdjjs	t1_e6b4jwx
Aeronautique_F	Philippines	1535263011	38	English	Tagalog	Ansakit ng katawan ko kasi naglinis at nagwax ako ng sasakyan kahapon. My car is all shiny now though, it was worth it. נ˜† In other news, today is the last day of the Hajj vacation. Pwede bang i-extend? I'm not ready to go back to work hahah! נ˜‚	e4umqx1	t3_9acuk2	t3_9acuk2
Globalri5k	Philippines	1539797084	43	English	Tagalog	its okey to dwell on the past and reflect on it. No matter what you do, hangout with friends, treat your family, play games, go to new places, Once ur alone babagsak at babagsak kapa rin sa tanong na "NOW WHAT". Damn, bro yung 10 years kasal na next stage ng relationship nyo. Heto nalang masasabi ko, next year may mas magandang mangyayari sayo. \*cyber hug\*	e7y35f8	t3_9os7th	t1_e7ww1v2
boudyouck	Philippines	1509321043	11	Tagalog	English	Pagtapos ng inuman nagbilin yung isang friend namin na gisingin siya ng 5am kasi kelangan umuwi ng maaga. 3 kami sa bed natulog, nasa magkabilang dulo kami. So after some days pagbalik niya sabi angkulit ko daw nung madaling araw, 3am daw ginigising ko na siya. Hinawakan ko pa daw braso nya and nakasmile ako ng todo. Sumagot daw siya na maaga pa kaya natulog ulit. The prob is nagising ako ng 2am …	dp2kdw3	t3_79gmv2	t3_79gmv2
ysab20	Philippines	1516094920	47	English	Tagalog	Kahit malanding pretty girl pa yan, kung katiwa-tiwala ang boyfriend mo, wala yan. Walang malandi kung walang tatanggap ng paglalandi. Ngayon, kung dahil sa pretty girl kaya ka iniwan, it's your boyfriend's fault. At least alam mo nang di worth it ang boyfriend mo.	dsr9tzf	t3_7qn9i4	t1_dsqxfhw
anitokin	Philippines	1519223454	27	English	Tagalog	Question: affected ba ang gdp projections ng 3rd parties ang fact na pumapasok tayo sa chinese debt trap? Marami kasing nagsasabi na ג€eh ano naman kung sa china tayo umutang at mataas ang interest? Maganda pa rin naman ang economic projection for the next few yearsג€ May mga tao kasing nagbubulag bulagan sa fact na ito(china) at kumakapit nalang sa magandang projection ng economy for the next …	duliiq5	t3_7z45gu	t1_dul9yeh
ElochQuentis	Philippines	1450866405	20	English	Tagalog	Re-posting from a few days ago: Na-double charge yung bill sa debit card ko sa restaurant (Ginza Bairin in Trinoma). The reaturant insists na wala daw double charge while my bank tells me na indeed double charge nga. The bank will send me a (settlement?) form to settle the matter pero 30-45 days processing siya. Kung yung restaurant na kasi yung mag-iinitiate ng refund, mas mabilis daw sana pero …	cy8tfwg	t3_3xy3u0	t3_3xy3u0
online_unni	Philippines	1538161725	22	English	Tagalog	Soooo... madedeploy kami sa ibang projects dahil nagclose yung account na handle namin... mgnt is giving updates pero di kumpleto, nothing is sure tas paiba iba and of course, nagpapanic ang tao. We were rushed to make a decision san namin opted mapunta between 2 accts, then all of a sudden iba na plano - because of that nadismaya un mga tao tas un lead na nagpapa meeting about it, sobrang dismis…	e6tb020	t3_9jo5xa	t3_9jo5xa
Mhineshie	Philippines	1531591259	31	English	Tagalog	Totoo yan, yung kabataan kasi ngayon ang mind setting ay "Mag e enjoy muna ako kasi di na ako makakapag enjoy pag nag trabaho na ako" so hanggang may funds pa sige lang focus lang sa pag aaral. and another factor is ung number of jobs and system dito sa atin kung saan pinapaburan ung pangalan ng skwelahan vs sa skill. And students no longer want to be a crew in a fast food chain or a call center …	e2dx65w	t3_8ythzy	t1_e2dwml2
bloodycreature	Philippines	1508917197	49	English	Tagalog	Mahirap nga makapasok, I suggest wala pang results mag apply ka na. Or the next day nung results. Yung iba kasi, inuuna nila yung mga nag apply through Job Fair/Review Centers. Kaya mo yan.	douwmk7	t3_78l8rz	t1_douthrc
theclassb	Philippines	1535618906	21	English	Tagalog	Hello. Una sa lahat, i feel you bruh, Pangalawa, you have to get your shit together. Medyo kelangan mong kapalan ang mukha mo/ double time kasi we all know that P400 will last you for a week (if youג€™re lucky). If resolved ka na not to go back to le parentals, maybe you can try this: 1. Couchsurf: preferably single trusted friend na naiintindihan yung shits mo, pero wag ka lang makicouchsurf. Tu…	e534599	t3_9belzg	t3_9belzg
AnimoAnino	Philippines	1535447578	39	English	Tagalog	Guys, on-time kami magbayad ng bill sa PLDT. Pero ngayon, 2 months na kaming walang internet connection. Oo alam ko may issue sa DOLE, pero okay lang ba yung matanggap ko na sagot mula sa kanila is: "Hindi namin kayo i-issuehan ng bill hangga't wala kayong connection" something like that. So in short, hanggang walang connection, walang dadating na bills?	e4yricl	t3_9ajfxk	t3_9ajfxk
starvingstego	Philippines	1447335087	46	English	Tagalog	Good job on your decision. Pero magahanap ka ng trabaho/Tesda course habang nakaenroll ka pa tapos pag may nahanap ka mag LOA ka sa college para di ka delinquente if ever gusto mo tapusin degree mo in the future. Go hard or go home!	cwxn54s	t3_3sj2hh	t3_3sj2hh
brain_rays	Philippines	1475801902	34	Tagalog	English	Wrong move nga talaga kapag pinapasok mo sila sa inyo or pumasok ka sa kanila. But good for you, nakatakas ka sa binyag! Medyo matagal 'yon, actually, may eksena pa na ililista ka sa Book of Life raw eh registration form naman 'yon. Haha. Hindi ko lang magets kung bakit kailangang may shotgun baptism na maganap. Feeling ko tuloy may recruitment quota kada member.	d8h9ggm	t3_567zrv	t1_d8h938q
gulpz27	Philippines	1543383946	22	Tagalog	English	IT peeps may alam ba kayo o kilala na pinoy na nagtuturo or may mga tutorial vids about programming/network/sysad stuffs na **FREE** lang. Balak ko kasi mag-aral nalang ng tech stuffs this December kasi matumal na mga hiring. Sa January nalang uli ako mag-try uli mag-apply baka mas marami opening. Isa pa pala kaya ganyan yung hinahanap ko kasi dahil sa learning style/method ko. Mas natututo ako k…	eamgmg3	t3_a12jio	t3_a12jio
jasmineteaaddict	Philippines	1509350486	45	Tagalog	English	Yes po yes po last na purchase na lang po tas ok naaa hahaha ugh what's wrong with me May investment and insurance na ko, two years na rin un. Promise I'm sticking to my usual expenses. Sa carinderia pa rin sa tapat ako nabili ng pagkain, o kaya nagluluto ako para makamura. Talagang since bata pa ko gusto ko na ng camera. Bumili na ko. Haha. Dami pala accessories nito. נ˜“	dp33mzt	t3_79jg3t	t1_dp30k37
petpeck	Philippines	1517739433	48	English	Tagalog	Kelan pa naging fact ang nonexistent na Tallano clan? Gold na galing sa Vatican na binigay ng Pope (na hindi pa pope nung time na yun). Gold na mas mabigat pa kesa sa TOTAL amount of gold mined by all mining corporations in history? Gold na nagkasya lang sa basement ng ancestral home niya?	dtprf2w	t3_7uy3wv	t1_dtpa1ru
boytekka	Philippines	1490380710	38	Tagalog	English	anyone been to Masasa Beach? Hows the surroundings? Balita ko marumi na daw yug mga ibang parts ng beach. Minsan may mga Certain "floaters" daw na makikita mo sa malapit. Balak sana naming pumunta next month	dfd0z6i	t3_61814u	t3_61814u
antemon	Philippines	1457890283	45	English	Tagalog	Alam mo yung pagtumama ang siko mo sa kanto tapos may natamaang ugat? Parang ganun... pero ang effect eh hindi sa siko. It everywhere in the abdominal region Puson is the main area, pero alam mo yung muscles for controlling urine? apektado din. lower back also	d0yddu2	t3_4a7uo4	t1_d0y5nh7
hermitina	Philippines	1547907298	34	English	Tagalog	mas maayos pa ang books pag first day, also i noticed mas madaming tao ng gabi (after office). and don't let palettes of books fool you, i remembered seeing a set of coelho books (12 books ata un) na isang malaking pile. the next day wala na.	eefuk8j	t3_ahizqc	t1_eef9kdz
77putingtupa	Philippines	1494310802	41	English	Tagalog	May sakit yung pocket beagle namin for months na. Napapagod na yung mom ko mag-alaga kaya gusto na niya ipamigay. Ayaw niya rin daw kasi makita niya na mamatay. Kaya pinapahanap niya ako ng pwedeng mag-adopt. Sad lang huhu :( Please don't judge my mom. She's taking care of 6 doggos atm (nanganak pa yung isa = 6 puppies) kasama yung pocket beagle. It's really hard for her to do this. Nung namatay …	dhbht7y	t3_6a3575	t3_6a3575
bellinis	Philippines	1502680351	45	English	Tagalog	P1100 allowance ko per week but nagbabaon bfast at lunch tapos dinner sa bahay na. Fare = 25 * 2 = 50 * 5 = 250 Food = 0 Pero bawi rin 'yung natitipid kapag weekdays kasi puro kain sa labas kapag weekends haha	dll7r45	t3_6ti2bt	t1_dll7792
tagatamong	Philippines	1522755194	43	Tagalog	English	Huh? He's merely noting that they used the 3.9% inflation figure from base year 2012 instead of the 4.5% figure from base year 2006. Baka daw kasi may magsabing propaganda nanaman... bakit yung 3.9% inflation ang ginamit imbis na 4.5% para mapataas yung projection...	dwq33ng	t3_89b49b	t1_dwpw7zq
thehandsomejj	Philippines	1513688468	46	English	Tagalog	Tangian inantay ko ng pagkatagal tagal yung pagpeperm, pinag-ipunan ko pa, tapos di din naman ako na-perm kasi maikli pa daw buhok ko. I have never been let down this bad. I feel sad. Samahan niyo ko kumain dito sa SM North hahahahuhuhuhuhu	drgwk8k	t3_7ksbmm	t3_7ksbmm
lizthomaniac	Philippines	1532389469	46	English	Tagalog	Nakakairita din pag yung boss mo masyado na nag ddwell sa mga personal issues mo. Or masyado lang talaga kong distant kasi Iג€™m not comfortable about telling my issues to other people. Ggr	e2wyai6	t3_91be91	t3_91be91
repsequalstherapy	Philippines	1492614349	10	English	Tagalog	Story time. Nakasabay ko kanina si sister ng ex ko sa jeep. Alam ko nakita rin niya ako pero umiwas ng tingin buong ride. Naawkwardan siguro kasi last I saw her was 2012 pa. Then it occurred to me that I used to treat this person as family and now she's a mere stranger. Masakit. Nag-flash back sakin yung happy memories with them dati. What if yung ex ko yung sumakay instead of her sister. I was r…	dggxws4	t3_6698bo	t3_6698bo
aile_rouge	Philippines	1537541890	19	Tagalog	English	Thank you! I am indeed trying my best to survive sa paraang alam ko. I was suicidal before. I still am. But now there are nights na I feel loved and important, hindi katulad dati na ang routine ko lang bago matulog ay umiyak at iconclude na wala nga talaga akong kwenta. Hahahaha! Totoo naman talaga yung sinasabi mo. Agree ako lahat. May consequences ang actions mo. At kailangan mong ituwid yun sa…	e6dr7tp	t3_9hla8q	t1_e6dpjnf
SongstressInDistress	Philippines	1483169342	25	English	Tagalog	You love rule of thirds, huh? Well-executed. Good job! 1 - would've been a little better if your subjects are moved a little to the left para sakto sa rule of thirds but this still works. 2 - wow, what is your shutter speed here? A little overexposed yung subjects mo but not that distractive naman. Baba mo lang din ng konti ISO mo para di masyado maliwanag? Man, I love this. Hirap ako kumuha actu…	dbtsgs8	t3_5l62tu	t1_dbtqtv9
fluffyderpelina	Philippines	1522802684	28	English	Tagalog	don't beat yourself up too much. lahat naman kayo natututo pa. :) wag mo na silang isipin, at maghanap ka ng study method na ma-eenjoy mo. mas matututo ka kapag ineenjoy mo ang ginagawa mo if you view your classmates as competitors, maaaring makakuha ka ng grades na okay eventually pero di ka matututo. try focusing on yourself and what you will benefit from your studies and mag set ka ng goals pa…	dwrkp6q	t3_89eorq	t3_89eorq
tannertheoppa	Philippines	1537862766	41	English	Tagalog	This might be getting downvoted pero I am wishing na magkaron ng Titan (just like sa Shingeki no Kyojin) sa buong manila or pilipinas then magkakaron ng mass genocide, for cleansing na din. Or to put it simply, mabawasan ng 40% ang population sa buong Pilipinas para mai-settle ulit ng maayos yung ekonomiya at natural resources natin.	e6ll7jh	t3_9imgm1	t3_9imgm1
ferofax	Philippines	1493016347	36	Tagalog	English	Metabolism is pretty much fixed, IIRC. Can't do shit about that. But, you can burn more than you eat. Also, bawal ka magutuman. Ang katawan, mejo slow yan, pero may sariling diskarte sa lahat yan. Pag madalas kang nauuhawan at hinahayaan mo lang, ang tendency ng katawan, "Ah, kelangan mag retain ng tubig." Result? Manas na mukha. Bilog na cheeks. Pag palagi ka naman nagugutuman, "Ah, madalang ang…	dgoa5ev	t3_676t67	t1_dgo6qgq
ferofax	Philippines	1494588154	31	English	Tagalog	Nood ka ng suuuuuuper sappy movie. Yung nakakapunit ng puso. Pero only if tinatablan ka ng sad scenes. Ako madalang tablan, unless really well done yung movie. Like, well developed ang character at na-establish nang maayos kaya may attachment ka sa kanya, so when something bad happens, ramdam mo.	dhgm56n	t3_6aqdbt	t1_dhglzr0
Smorg101	Philippines	1496840890	39	Tagalog	English	Kung i aargue ko sa murder rates, hindi sila parehas. Binasa ko rin yearly reports ng Phil Stats about crime, hindi rin ganito kalala. Tas hindi pa sila nag rerelease ng data ng 2015-2016 for comparison. Bakit walang nag iinvestigate ng 12000 murders? May mga kakilala ako na namatayan na. Mga anak nila pinulot lang at pinatay ng mga pulis. Nasan yung justice dun?	dikreki	t3_6frl76	t1_dikntlr
raybridge42	Philippines	1517956485	48	Tagalog	English	Thank you sa correction regarding sa Rebisco! Sa sabungan naman, I think weekends na lang yata may tupada doon. Hassle din kasi pag nag-tupada sila ng Huwebes; sala-salabat yung nakaparadang sasakyan papasok ng Kaybiga.	dtugy3e	t3_7vjlti	t1_dttbebs
sarmientoj24	Philippines	1520516429	39	Tagalog	English	Am I the only one who wants that once I was retired, I have a house or vacation house na parang ung sa lugar ni Forrest Gump? Ung sa bahay nila? Or parang ganyan? Ung principal namin may rest house sa San Ildefonso or San Miguel ata un sa Bulacan, may mga kalabaw saka kabayo saka manok. Ang cool kako nun haha	dvdhaz1	t3_82uu1i	t3_82uu1i
macthecat22	Philippines	1512461596	23	English	Tagalog	Only difference is i got my scholarship from DOST. Gusto ko kasi may deeper understanding ako sa field ko para maging useful ako sa future. My parents see it as ambitious and even discouraged by my middle aged former office mates that my move is a career killer kasi sobrang bata ko pa daw. I'm 24 and I'm taking advantage of my sharp memory, high energy to do lots of school stuff and ZERO responsi…	dqsjgw2	t3_7hkm4v	t1_dqsjaeq
Electro_Orange	Philippines	1543196455	25	English	Tagalog	Kung may common sense ang HR, posting employees' salaries publicly could cause a lot of ill wil between co-workers. Kaya di na din siguro nakakagulat na ganyan ang culture. HR should know the boundaries of transparency and decency. Samin matindi, HR na mismo chumichismis sa ibang tao kung magkano sweldo ng bawat isa. O diba, tipid sa ink at papel hahaha. I feel you brother, konting tiis pa. A few…	eah5bov	t3_a0cu19	t1_eah4sxh
Ivyisred	Philippines	1546343260	34	Tagalog	English	Work rant ahead huhu. May schedule kami ng oncall. Nagpa holiday leave ako today tas biglang ako na ung oncall? Tama ba un? :( Bakit skin lang nila to ginagawaaaaa Kainis sa work place minsan. Magtanong ka onti na work related sabihan ka nilang umaattitude. Hay nako. נ˜¡	ed0bf3e	t3_abh1dy	t3_abh1dy
wandermarie	Philippines	1531090242	43	Tagalog	English	May class suspension pala today, buti nalang nagcheck ako ng phone. Galit na galit yung little brother excited pamo sya pumasok at first time nyang pumasok ng maaga נ˜‚ Pero sobrang tirik ng araw ah, tapos kahapon drizzle lang.	e20ymod	t3_8x54oy	t3_8x54oy
syxop	Philippines	1520501818	32	English	Tagalog	I talked to someone (babae) tapos biglang umayaw yung lalake sa panliligaw and ayon sya naman yung naghahabol. I know people just want to be sure because you can't just get out of a relationship but yeah keep on going until she develops attachment to you.	dvd9wxb	t3_82umt8	t1_dvd4vv3
FadeAWade03	Philippines	1503459040	32	English	Tagalog	The achievement he has done in Marikina is no doubt good. If not, exceptional. But whenever I see him, or just his name, lagi ko naaalala how his MMDA Men handle the dispersal of the bangketa vendors. Literal na hampas ng dos por dos, sapilitang pagkuha ng mga paninda. Riot will ensues, batuhan, sapakan. Yung nasa truck pa lang ung mga MMDA men may hawak ng pamalo.	dm01jzx	t3_6vg348	t1_dm0049s
psychedeliccolon	Philippines	1475679221	49	English	Tagalog	Sa La Salle Dasma ba 'to?! Nag Nursing kasi ako doon tapos madaming Nigerian students. Yung bio prof ko may sinabi ding racist. Something about how ugly they'd look naked kasi wala kang makikita.	d8f23bs	t3_55z1vn	t3_55z1vn
Akoaymaylobo	Philippines	1543672909	29	Tagalog	English	Gusto ko manood ng narcos kaso ginagamit pa ng kapatid ko yung tv. Yoko manood sa laptop kasi mas enjoy pag bigger screen. While waiting, nakinood din ako. Pota puro makeup tutorial ang pinapanood niya. Alam ko na tuloy ang process ng paglagay ng makeup. * moisturize *apply primer *apply foundation, blend with a brush *contour *do the kilay and so on. Kaya naman pala ang tagal tagal ng mga babaen…	eauqw7f	t3_a21ufz	t3_a21ufz
jinxyyy13	Philippines	1546952518	34	English	Tagalog	JLC. There was this meet and greet event at wala syang kagana gana that day. Hindi man lang ngumingiti at parang gusto na nyang matapos kaagad ang event. Ang dami pa namang gustong magpapicture sa kanya that day. Nagdraw sya ng face and put "self pig" sa autograph signing table using a permanent ink kaya nasayang pa tuloy ang table.	edk2sk8	t3_ads46g	t3_ads46g
tangin-a	Philippines	1426560976	30	Tagalog	English	~7:30 AM, Buendia station. Nasa may bandang pinto ako. May babaeng nasa harap ng horde na nag-aabang. Pagbukas ng pinto, halos parang tinackle ako para makapasok siya, and medyo nakapkap niya harap ko. Naintindihan ko naman, kasi mukhang gusto na niya makasakay, and inassume ko hindi naman niya sinadya. Pagsara ng pinto, medyo nagsettle yung mga tao. Naramdaman ko na may parang daliring gumagapan…	cphasrs	t3_2za4bs	t1_cph5vot
awk7	Philippines	1483290227	24	English	Tagalog	See this, this is what's wrong: putting people on high standards, a pedestal. Like motherfucking idols that you worship and go gaga for. Geez, we are human beings: we have feelings, we have our own unique identities. It is up to our SO to determine our value to them, and not our value to everyone else's. I get your point pre, putangina nung mga freeloaders sa date mapa-babae o mapa-lalaki. Meron …	dbvc91q	t3_5lek3f	t1_dbv88gu
Ikilledmypastaccout	Philippines	1483975618	34	Tagalog	English	I'm surprised yours survived for 2 years! Yung sakin hiniram ng kaklase ko nahatak daw sira agad. :( So sad And yeah I tried that. Thankfully di pa ganun kalala yung tinnitus ko. Tska meron ako laging *background noise* kaya di naman masyadong mapapansin. Salamat sa mga tricycle at electricfan	dc76zg8	t3_5mwuvs	t1_dc76k95
Demoglobin	Philippines	1511411703	42	English	Tagalog	Sabi ng pinsan ko na nagwowork sa isang luxury resort sa Palawan, nag-stay daw dun last year ang Kathniel for 3 days. Silang dalawa lang daw and they barely leave the room during their stay. Suking suki sa room service and malaki din daw magbigay ng tip si DP.	dq81zc7	t3_7appyx	t1_dpf6rwg
stranglingisfun	Philippines	1522805199	35	English	Tagalog	Mahirap mag commute pag weekdays (work) since madami ka kaagaw sa bus/jeep/fx. Unlike pag may kotse ka, okay lang na matraffic at least nakaupo ka at comfortable. Ayoko mag drive pag bakasyon dahil nakakapagod mag drive. Vacation = out of town for sure. Tapos dapat mahaba tulog mo para ready ka papunta at pauwi na byahe, so di ka masyado makakapag saya.	dwrnl9g	t3_89j49p	t1_dwrlvoy
maroonmartian	Philippines	1520491525	25	English	Tagalog	Dami actually. Rodics is the first UP food establishment I've eaten. And dun di ko ata dinate yung isa kung gusto na girl (now a lawyer). And usually at the start of the semester, pag mabait yung prof namin at nag-iiwan ng readings (yung ilan, syllabus lang binibigay at bahala ka maghanap sa library). Especially those language classes (French, Japanese). Di namin kaya bilhin yung original. And nu…	dvd58d9	t3_82uw46	t3_82uw46
DaemStafel	Philippines	1524948008	14	Tagalog	English	Sobra. Dati nakabili ako ng expired na tinapay. Pag mahaba yung pila tapos konti lang items mo, at wala pang express lane, kawawa ka. Yung cashiers nila madalas nagpapabarya. Pwede mo maiwasan yung mahabang pila pag tanghali pero pag di mo kaya yun dahil sa schedule mo, walang masyadong choice. Marami paring bumibili, kaso problema walang masyadong pamamaraan at di lang naman nagaadapt pag dumada…	dy4pp7r	t3_8fiot6	t1_dy4pgwe
atomchoco	Philippines	1513645444	32	English	Tagalog	Oo nga, pero because it's merely a currency wala siyang intrinsic value, unlike stocks, gold etc. Dapat alam ng investor kung pano imonitor yung transactions by viewing yung mismong block chain or idk kung mavview mo ba yung transactions mo on a personal level kasi di ba yun nga yung point nung Bitcoin/cryptocurrency Otherwise madali talagang maiuwi to sa scam	drg74j5	t3_7koihm	t1_drg6xns
t0tally-incognito	Philippines	1519981465	32	Tagalog	English	Aw. I think that would be more expensive. That's molar *surgery* na as per my dentist. Actually yang 5-10k, quote yan sakin just today nung maliit na dental clinic malapit dito sa office kasi nagpa-ayos akong retainers kasi di ako makaka punta sa dentist ko, yung sa dentist ko talaga, 10-15k pero hindi pa impacted. You could go to PGH daw, free, yung anesthesia lang daw sasagutin mo.	dv2a8x1	t3_81bjbb	t1_dv2a3rx
chocolatemeringue	Philippines	1546948622	23	Tagalog	English	&gt; So why in God's name was the wish granted? WHY?! Sabihin na lang natin na...darating sa punto ng bawat tao na mari-realize nila na merong mga bagay na mas mahalaga para sa kanila, kaya yun yung mas pipiliin mong gawin (hahaha). Eto ngang si ser akala namin dati ay mamamatay nang mag-isa na bading, pero sabihin na lang natin na siguro at one point narealize niya na hindi pala yun yung gusto n…	edjzq0r	t3_admoa3	t1_edjz8gx
patay_na_daga	Philippines	1493542859	49	English	Tagalog	hahaha oo nga puro chinese at korean talaga dito kasi yung japanese halos nasa guam lahat..Pag sa hotel accommodation meron breakfast buffet.. Dun kasi kami dati.. Sa may pasay manila area ba ano maganda hotel na may casino?	dgxuocm	t3_68ebof	t1_dgxumrh
creep2knight	Philippines	1467903074	33	English	Tagalog	yup, it's pretty much Ingress dressed up like Pokemon. &amp;nbsp; the battles (which for me at least, is the highlight of the game) are rather lackluster and rely pretty much on the level of your mon and RNG. expecting the game to have items you need to purcahse with real money to 'make your pokemon stronger' &amp;nbsp; pagkatapos ng isang buwan or dalawa, the hype will die down. lalo na yung mga…	d52uqxc	t3_4rlwf3	t1_d52a883
Bebel_bebel	Philippines	1527517084	30	Tagalog	English	Pag regular bus,mukha ka na nagwork ng 4hrs pagdating sa Ayala, masstress ka sa tagal ng byahe lalo if impatient ka or nasasayangan ka sa oras. Kung may UV express from Diliman to Makati try mo yun,baka mas maginhawa ang commute. P2P mas mabilis byahe kasi di na naghihintay every kanto and di nagbababa kahit saan. Pero parang promising yung bus na sinasabi na deployed ng gov't, try mo muna yun. B…	dzpiwkw	t3_8moxsp	t1_dzpi4tc
stoicismSavedMe	Philippines	1497466417	48	English	Tagalog	i feel you. crush na crush ko ung isa kong senior tapos dati magkatabi lang kami ng cubicle :&gt; kaso ang layo ng nalipatan nya huhu. at least kasama ko (among my other colleagues) sya sa lunch. qtpi talaga nya :&gt;	diwke81	t3_6h8e1g	t1_diwbnwp
ikawnimais	Philippines	1516718367	47	English	Tagalog	depende kasi sa gusto mong career path yan eh. if gusto mo talaga yung kung anong natapos mo, i think that is good, and follow it. pero give it 6 months or so. kasi very suspicious yan for HR if 1 month experience ka lang. or at least 4 months man lang	dt44vsv	t3_7sddqw	t1_dt441vy
surething_pating	Philippines	1548285283	41	Tagalog	English	Oh that is so sad to hear! Kahit papano dito sa amin pinakalowlevel effort na ang mag pass the hat sa buong company. Yung iba talagang nagawa ng event for fund raising. Bat di kayo pinayagan? Parang ang heartless naman..	eeswysn	t3_aj51qc	t1_eeswt9g
MrGatts	Philippines	1505047596	36	English	Tagalog	Sadly, grade 11 pa lang ako so di ko pa pwedeng gawin yung mga activities na sinuggest mo pero kapag di naman kami busy I always try to take her out on a date at the end of the week. I already know na love isn't always going to be romantic, or kilig, or sweet pero ang hirap din pala panindigan. Anyway, thank you for your advice, senpai!	dmt6thp	t3_6z7gj3	t1_dmt6ltr
tropicalcamel	Philippines	1508913832	46	Tagalog	English	Shout out to the Catholic priests na palipat lipat lang ng assignment kasi nahuhuli na may asawa at anak haha Or yung mga nahuling nangmomolestya ng mga sakristan Hello~	douvare	t3_78l42o	t3_78l42o
Riesig19	Philippines	1508335376	33	Tagalog	English	After hearing the statement of Solano, mukhang he got the short end of the stick But could be a "play" for them instead? Brods and all. Pero kung nilaglag nga nila si Solano, eh di nakaka lungkot lang isipin na ganun pala sa isang frat, ikaw na nga tinawagan kasi marunong ka ng first aid, ikaw pa nilaglag.	dojelbj	t3_7743wu	t3_7743wu
Aspiring-penguin	Philippines	1498904020	35	English	Tagalog	Incoming stream of thoughts. Can I talk a bit about the whole reporting of hokage groups? I am not in any way against it, but it feels so much like we're attacking a symptom of the problem rather than the real issue, which is the "macho" culture prevalent here. It's confusing cause it's not fair to say that Filipino men don't respect women at all. My guy friends do respect girls, but somehow when…	djn4841	t3_6km79n	t3_6km79n
podboi	Philippines	1480765854	45	Tagalog	English	Pare, hindi mo gugustuhin yung feeling ng kinakabahan ka buong buwan, inaabangan mo na mag red-days si GF. Isa akong tanga aaminin ko sayo at sa reddit, sinubukan ko na raw. Nabunot ko naman sa tamang oras pero kabang kaba pa din ako. Never again, mula nun always with protection kami... Yung risk reward ratio na isusugal mo talong talo ka pare para sa ilang segundo na orgasm lang, compared sa pag…	daqfigi	t3_5g8x3i	t1_daqe0js
HDCruz	Philippines	1535503733	37	English	Tagalog	Bigla na lang siya hindi ulit nagparamdam. Which is weird after all what she said. Hindi naging kami ulit. Last time I saw her, around 5 years ago. Nung inimbitahan niya ako sa launch ng EP album nung banda niya. May GF sya that time. At Nag-away sila nung dumating ako sa album launch. So umalis na lang ako agad. Ngayon, konsehal na siya sa bayan nila.	e50bek8	t3_9ajgeg	t1_e506f0x
nutribun	Philippines	1476343049	49	Tagalog	English	My mom rode a p2p bus yesterday, di ako tinigilan kung gano sya kasaya at ka kumportable magtravel. Mejo pricey lang daw at di kilala ng mga tao. At the usual, pag bago sa mga pilipino, ayaw nila.	d8pz7ue	t3_578ppi	t1_d8pyosv
BurnBabyBurn00	Philippines	1515139006	31	English	Tagalog	Pero ang LAKI... uhrm...nang paghanga ko sa hair niya! Puwede ba huwag ma tayong magalit sa kaniya? (Remembers Mocha screeching and cursing in that radio show against Robredo, the one which caused Mocha to be fired. And that she is being touted right now as a shoo-in for Senator.) Sige na nga, magalit na nga tayo sa kaniya! *Remember not to look. Remember not to look...*	ds7v436	t3_7o8qq0	t1_ds7obdi
GerardusAntilochus	Philippines	1501043067	40	English	Tagalog	Fair sentiments, but I believe he was referring to how most NGOs operated in a painstaking, systematic, check-and-balance, bureaucratic process, which isn't the quickest means of doing things, especially if part of your constituency mistakenly equates "daang matuwid" to "daang mabilis na direktang tatapos sa gutom/kahirapan/katiwalian" thus the "...engaged in a lot of processing, which NGOs love,…	dkqb32a	t3_6pjq0e	t1_dkq29vv
kixiron	Philippines	1505366310	21	English	Tagalog	Reporting from the Manila International Book Fair! Medyo OK pa ang dami ng tao dito, hehe. Sa Sabado pa talaga ang dagsa ng tao. Aagahan ko para masulit ung balik ko. 1/4 ng space sa 1st floor, okupado ng NBS at Fully Booked, then another 1/4 by the Christian bookstores and publishers (including Opus Dei's), 1/16 by the university presses (Ateneo, UP, UST, even FEU, but not La Salle), and the rem…	dmze9fz	t3_6zzvnb	t3_6zzvnb
HastaHasta_	Philippines	1541604738	36	Tagalog	English	I agree with you here. People should stop giving moniker to places such as that. It makes the place lose its identity. Ayaw ba nila sumikat yun lugar nila bilang sarili nitong pagkakakilala? Hindi dahil tulad ito ng isang lugar? :/	e98ay53	t3_9uwr5w	t1_e97pwbk
pldtwifi153201	Philippines	1534610778	30	Tagalog	English	Nanuod kami ng The Day After Valentine's ng mga ka-officemate ko tapos biglang nagkayayaan mag-inuman *to past the time kasi traffic*. Seriously, after isang tower ng Weng-Weng, nagkaaminan na kung sino yung dead inside at nagpapanggap na lang matino sa Office, struggles sa lovelife, etc. Tangina. Everyone goes through something we don't know about, it actually pays to be kind.	e4f0tmg	t3_98cnxj	t3_98cnxj
lemownsquare	Philippines	1523240794	45	Tagalog	English	Oo naman but the things is i doubt na gagawin niya yon hahahahahahaa. Siguro saaabihin lang niya whether di niya ako gusto or gusto noya ako or di niya parin alam. Anyhow, tinatapos ko lang yung mercury retrogade tas bahala na si batman sa pagtatanong ko ahahahah	dx1sfg6	t3_8atdyx	t1_dx1rx1p
gingervread	Philippines	1532580764	41	Tagalog	English	Hmmmm.. Honestly, madaming magaganda sa mahihirap. Galing ako sa urban poor HS, daming babe talaga. Kaso pag poor, di masyadong graceful ang pagtanda. Alam mo naman, stress atbp. Bihira ka lang makakita ng 35yo na urban poor na flawless whereas daming milf na mayayaman. Perks of belo siguro plus skincare. Im speaking of class D and E ha. Yung mga urban poor talaga.	e31wahv	t3_91yxmk	t1_e31u6kn
BabyFlo70	Philippines	1477618774	24	Tagalog	English	**Good morning insanely awesome redditors of r/ph!** Malapit na naman sapian ang mga bank accounts natin ng espirito ng 13th month pay, anong balak ninyong gawin dun? Yung sakin, hati kami ni mama, tapos yung part ko, yung iba isesave ko, yung matitira baka bumili ako ng computer monitor (*ASUS VC239H*) or kung sakaling makahanap ng makakadate this holiday season, dun ko gagamitin... kayo ba? **H…	d9aujhy	t3_59qsb4	t3_59qsb4
stevenschlongniverse	Philippines	1526394387	47	English	Tagalog	malapit na matapos klase... gusto kong itreat yung sarili ko sa buffet kaso wala nga pala akong friends na pwede ako samahan :\( anybody ever tried eating at a buffet alone?	dz0ln6r	t3_8jkcvt	t3_8jkcvt
halelangit	Philippines	1543844285	40	English	Tagalog	&gt;sa 'tate nga, 14 years old nakikipag kantutan na ~~Nice try, hebephile~~ Basta kung 18 yrs na either one of them ok na, wag nga lang yung Freddie Aguilar na kind of gap kasi tangina. Yung kay Vic &amp; Pauline, ayaw lang namin kasi Vic, Horsie &amp; Joey ay pinagnasaan ang 14yo. Sorry lang minsan madumi isip ko hehe kaya yun. Pero may risk din yung ganyan - jailbait. Worse, kasuhan pa ng pare…	eazy05l	t3_a2na1n	t1_eazvy3x
39295	Philippines	1466266966	44	English	Tagalog	Some actually try na mag-birth control but they lack the understanding and information eh. Friend of mine once told me about a mission they did sa isang sitio na ang mga residente nag-rereuse ng condoms. Parang damit lang na sinasampay.	d4eeg6n	t3_4oom9l	t1_d4ec005
Fulltergeist	Philippines	1545126454	45	English	Tagalog	Iminumumog ba yun? True story: A former officemate asked for a recommendation for her BF's sore throat. We suggested Bactidol, Bumili sila at ginamit over the weekend, pagdating ng Lunes di pa din daw gumagaling kaya nagtanong "ilang ml ba dapat? baka kulang yung iniinom niya".	ec1atv3	t3_a77fvs	t1_ec1aqru
breakgreenapple	Philippines	1547513967	43	English	Tagalog	I have a former colleague who lives thereabouts and she describes her morning commute to her office in Cubao (Gateway) this way. &amp;#x200B; One jeepney ride to Tropical or Sta. Lucia Another jeepney ride to LRT Santolan Station Another jeepney ride to Cubao if LRT is too congested. If it's okay, LRT to Cubao for easy access to Gateway &amp;#x200B; Imagine yung hirap nyang yan. Dapat isang sakay…	ee35s7m	t3_afv0ls	t1_ee2663v
bagon-ligo	Philippines	1506062120	23	English	Tagalog	Actually nung hindi pa cya umupo ay nang husga na ang katauhan.. so generally, hindi po cya nagka isang taon ng chance.. At sira na ba talaga ang ekonomiya? Kasi I belong in the BPO like industry, and honestly its booming right now more than ever. We've had more clients and investors than before. But yes ofcourse the BPO industry is not the only bsis of economics, but hey hindi rin natin dapat li…	dncfhkd	t3_71n9ut	t1_dnc3llj
syaochan	Philippines	1512444880	47	Tagalog	English	"Punta ka syaochan, reunion!" "May trabaho po ako eh." "Kahit pasko?" "Opo. Baka po kasi mag-down ang data centers at servers namin." I'm actually not a sysadmin, pero hulugan mo ng tech jargons ang mga kamag-anak ko at di na sila magtatanong. So I spend a relaxing, social landmine-free holiday with me and my anime/manga/video game marathon, YAAAS!	dqs8q1s	t3_7hgga5	t1_dqqtttk
bradleon	Philippines	1538931678	30	Tagalog	English	So, sino ang pangulo noong 2010-2016? Si PNoy. Base sa pag-amin mo ay maganda ang ekonomiya noong panahon ni PNoy. There's the proof from your own statement. Now, include the corruption sa analysis mo sa pagiging leader. Between the 2 ay sino amg magnanakaw? Okay ba talaga sa atin na kung maayos ang ekonomiya ay okay lang magnakaw ang presidente o leader? Competent si GMA when it comes to the eco…	e7c9x0i	t3_9lvqqo	t1_e7c93gb
bypaular	Philippines	1495631795	43	Tagalog	English	Yeah, I agree with this one. You'll never know her true intentions if you don't get to know her better. Just hang out, pero dapat chill lang. Wag masyadong tumitig sa itsura niyang maganda haha baka mahulog ka nang wala sa oras :D	dhz4owk	t3_6d15rx	t1_dhz45yv
Yamarai	Philippines	1480855077	39	Tagalog	English	HOW DO I SAVE MONEY? My everyday allowance is P220.00 and may natitira naman pero biglang nawawala kapag nakakakita ako ng pagkain. Hatiin ko ba yung baon ko at isakto ko lang base sa needs ko tapos iwan ko agad sa bahay ganun? Hehehehehe	darr1zj	t3_5gesmi	t3_5gesmi
solidad29	Philippines	1535117617	45	Tagalog	English	Masarap naman ang burger at chicken nila. They also have this 50% off every 7th of the month of what ever meal they want to showcase. Kadalasan yung burger nila. Hindi ko lang pinapatulan kapag yung clubhouse nila ang nasa 50% special nila.	e4r2pj5	t3_99o6o5	t1_e4r26br
kuyanyan	Philippines	1486602547	25	English	Tagalog	Saka di ba, pag tinawag kang bakla noon, tinatawag kang duwag? Sa Florante at Laura ko yata na-encounter yun. I think it's more insulting when put in that perspective because we're equating cowardice with a gender that is still facing a lot of discrimination to this day. Parang N word lang yan, it's okay within the group pero if you're out of the group, hinay-hinay lang, wag feeling close.	ddig4ze	t3_5spl2p	t1_ddh8d5d
jarheadd	Philippines	1524970985	43	Tagalog	English	Sayang kasi eh. May router na ko that could act the same way. Closed lang talaga other LAN ports kaya di ko siya magawa. Ayaw ko na bumili ng iba kasi sayang yung nasa bahay. Working naman.	dy5947m	t3_8ea5r3	t1_dxtuiv7
carissalways	Philippines	1489059683	45	Tagalog	English	Nagawa ko to dati pero sunog yung popcorn dahil di pala gumana yung timer ng microwave I spent the whole morning apologizing to everyone who walked in and grimaced at or commented on the smell of something burnt hahaha	depcrhv	t3_5yax8u	t1_depah1d
ar1os	Philippines	1486975613	45	Tagalog	English	Having a right conduct here is a matter of choice, not a matter of what's right or wrong. Yung pala-murang presidential candidate nga nanalo, tinawag pang elitista yung mga kumukutya sa pagmumura.	ddojtdv	t3_5tqrih	t1_ddojlo4
angsagot	Philippines	1460446422	21	Tagalog	English	Bakit naman? Hindi ba dapat responsibility ng driver na siguraduhing may panukli siya considering you're paying him for a service? Siguro kung 500 yun dun lang ako maiinis kung ako yung driver. Don't get me wrong, it's always better na magdala ng barya as a commuter, pero hindi mo pa rin maiiwasan na matyempong wala kang barya. Naranasan ko na 'to dati papasok ng school. Medyo nagmamadali ako kay…	d1zjwov	t3_4ed06o	t1_d1zj996
may_ganito_pala	Philippines	1523541764	35	English	Tagalog	Try mong sa gabi lang talaga natutulog. Avoid too much snooze sa alarm (pwedeng once, then bumangon ka na) and avoid sleeping in the afternoon even on weekends. Nawala pagka-antukin ko dun, parang na-train yung katawan ko kung kelan lang siya aantukin. But what works on me, might not work for you. Suggestion ko lang. Hehe	dx8qv37	t3_8boz7x	t1_dx8q392
eliebelie	Philippines	1413968140	44	Tagalog	English	Nase-stress na ko sa teammates ko. Dama ko yung tamad na tamad na sila magtrabaho. Parang wala nang effort. It shows on their output. At yung supposed "senior" samin, parang iniwan na sakin lahat ng trabaho nya. May agreement kami na I'll pick up what she can't work on kasi nagaaral sya, pero ngayon halos lahat ako na gumagawa. Tapos yung isa forever nagba-barok English. Sinasadya nya. Sa umpisa …	clgeon0	t3_2jxjgv	t3_2jxjgv
curricularguidelines	Philippines	1531544890	49	English	Tagalog	Yan din yung pinagkakatuwaan ng mga relatives ko sa states pag umuuwi dito. They are very fond of converting philippine prices to the dollar equivalent for every service/product they buy to see how much they saved.	e2d1xkr	t3_8yno95	t1_e2cbifg
napadaanlng69	Philippines	1532003342	40	English	Tagalog	Sir sorry late reply. Ang mga nakwento sa akin noong mga nakasama ko sa exam sa PDEA (may iba kasi doon sundalo nag apply) sabi nila sa initial interview usually mga basic lang tatanong sayo like - tell me about yourself, family background, reason bakit gusto mo mag enlist sa sundalo, ano pwedeng ma contribute mo. Sa final interview, ganun lang din question pero mas challenging ka dapat sumagot t…	e2nskev	t3_903pbd	t1_e2nmv5n
psycrow117	Philippines	1448245737	46	Tagalog	English	yeah... possible din maging mas hassle sa commuters since mas tatagal din ang pag antay nila. always remember hindi lang bus ang nagiging cause ng traffic sa EDSA. masyado na talagang madaming sasakyan sa metro manila.	cx9pbt4	t3_3tvr6k	t1_cx9n90n
exdas	Philippines	1414676189	45	Tagalog	English	Rant. So noynoy just approved the rehabilitation budget for Yolanda victims. Just approved. Just fucking approved. Ano Pilipinas? Where is your NOY Now? Puro kayo binay, samantalang mga kababayan niyo hanggang ngayon naghihirap. Mga tupa ng media! Mga tupa ng mga partido! /Rant	clo583k	t3_2krnrp	t3_2krnrp
lei1211	Philippines	1546340889	40	Tagalog	English	Dalasan mo lang uminom para tumaas yung tolerance mo. Might want to take note rin kung anong alcohol ka mas mabilis tamaan para alam mo kung ano ung magiging preference mo sa drinks kung gusto mo tumagal sa inuman.	ed09xt9	t3_abh1dy	t1_ed08y3z
ithinkihaveocd	Philippines	1427342498	48	Tagalog	English	Mukhang hindi ka pinapayagan ng manager mo na mag leave ah. Wala namang rule para dun. Kaya nga kapag Christmas break yung mga employees connected na sa holiday yung mga leaves para tuloy tuloy.	cpr1ra0	t3_30bp4x	t3_30bp4x
riddleculous	Philippines	1539006126	33	English	Tagalog	Palimos naman ng insights. Bale fresh grad ako pero may work na for 3mos. 18k starting. Natanggap ako pero iba yung inapplyan kong trabaho sa actual kong trabaho. Bale writer talaga pero ang nangyari naging researcher ako. Which is ok naman nung una. Tapos naging magulo na yung work. Nagkaron na ng analyzing part tapos may data involved na so more on research analyst na. Most times analyst talaga…	e7e2t5j	t3_9mdijo	t3_9mdijo
portfoliogy	Philippines	1422952838	13	Tagalog	English	Go ahead keep making excuses for her. She admits it herself that there are other options. So sinasabi mo, na wag syang matutong maglinis, magluto, mamalengke, maglaba, mamalantsa kasi may kasambahay naman? Nasa kanila yun kung anong gusto nilang ibawas sa budget nila para makaipon. Kung para sa kanila, worth it naman ang may kasambahay, edi sa iba sila magbawas. Basta malinaw na dahil sa convenie…	co9nqr1	t3_2ulv5d	t1_co9njj1
Mr_Connie_Lingus69	Philippines	1488254059	42	English	Tagalog	Ganda ng movie no? yan yung mga gusto ko, not a love story but rather story about love. And hindi lang din about sa love itself eh, see yung graduation ceremony is just a representation of graduating from the things we need to graduate to, like sa kanya yung pagibig kay *Doi* haha. On the question, Yes I do attend all of them, from preschool to College. I always strive to make my parents proud an…	deb2u23	t3_5wjq3a	t1_deav3ub
Pasencia	Philippines	1501737776	43	Tagalog	English	Electrical Engineer here. Currently nasa Property Management industry. I wanted this job kasi I am curious on how different systems work inside a building. Madami din namaj learnings dito kasi halos sakop nito ang lahat. Matututo ka ng plumbing, mechanical, civil, archi etc. At times, it's like watching paint dry pero may times na kahit sa panaginip mo eh minumulto kana. Tips ko lang sa interview…	dl3ilvo	t3_6ra2mh	t3_6ra2mh
vardonir	Philippines	1498213135	38	English	Tagalog	i've tried different types of shawarma (although nakalimutan ko maghanap ng shawarma nung nasa tel aviv kami) pero wala pa rin tatalo sa all beef ng turk's. nakakasawa kasi dito, puro chicken and veggies. (/not an ad) in other news, nagsisilabasan ung mga redditor sa FB feed ko haha	djah2tx	t3_6j08bw	t3_6j08bw
adun153	Philippines	1403075436	32	English	Tagalog	not really. baka may kapangalan ka lang na wanted or something. Plus, minsan for minor reasons lang talaga. Sa akin, may hit. Pero may kinalaman lang sa pagiging DOST scholar ko dati, bawal pa akong lumabas ng bansa for work. Pag may hit, and wala ka naman talagang kasalanan, it only means na an extra step sa screening - usually kakausapin ka lang ng isang officer dun or something.	ciajdsa	t3_28esp3	t1_ciahtpa
i-alone	Philippines	1521941774	45	English	Tagalog	it sucks no. tapos yung parang may gusto kang gawin pero powerless ka and you have to swallow the fact na there's nothing you can do about it.	dw8lwjp	t3_86wbe6	t1_dw8kiso
avidfanofyakult	Philippines	1519285812	17	Tagalog	English	Halos bumula bibig ko kanina sa galit. Inutusan ko yung pamangkin kong bumili ng sundae sa Jollibee, sabi ko yung caramel syrup lang, walang chocolate, ulit ulitin sabihin sa cashier kasi minsan kahit sinabi mo na, gagawin pa din nila. Pagdating sakin, may halong chocolate syrup. Before I ripped him a new one, kumaripas na ng takbo. Nakuuuu. I almost went to Jollibee para lang papalitan kaya lang…	dun51q5	t3_7zbxmh	t3_7zbxmh
Arkvelsa	Philippines	1495697566	31	English	Tagalog	Pero alam ko nung nag-aapply ako nung 2011 to 2016 lagi naman ako yung principal debtor at yung magulang yung debt guarantor. Tama naman ako na sa CRS pa rin yung application ng loan right? Wala namang problema as long mabayaran mo agad siya in 1 sem (and continue the loop). (if you could send me the pdf copy I might be able to compare)	di0m4mv	t3_6d79n0	t1_di0m2r8
BlabberBobby	Philippines	1547951568	46	Tagalog	English	Tinatanggal yun. They wash it inside out, tapos babaligtarin ulit before boiling then skewers. Matrabaho yan. Kung real talk yan, ibig sabihin di pa kayo nakakakain ng totoong inihaw na isaw. Grilled chicken poop ang favorite nyo.	eehu2w0	t3_ahl6a5	t1_eefvoec
citrouillevz	Philippines	1467899527	48	English	Tagalog	This is true, nakakalungkot din na may access siya sa good education pero opted not to utilize. Hindi 'yan magrarant ng ganyan karumi kung nag-analyze muna kung bakit ganun ang mga Pilipino. :/	d52sdbx	t3_4ro0st	t1_d52p8qi
iiK0	Philippines	1538715770	30	Tagalog	English	Though graduate na ako nung narinig ko to. Dati daw sa old school namin (hs) may prof (male) kami na sobrang friendly sa mga students, kahit ako kaclose ko, nakikipagclose daw sa mga male students sa batch ng sister ko (mga grade 8 o 9) ata sila noon. Nung nag-uusap daw yung prof at yung friends ng kapatid ko sa messenger, bigla daw nagsend ng dick pic yung prof. Tas tinanong kung ano daw sa ting…	e776jju	t3_9lh9x9	t3_9lh9x9
nerve_wrecker	Philippines	1520239057	46	Tagalog	English	Meron ba ditong fellow Pinays or Pinoys na mahilig magdamit retro? 30s-60s na era, something like that. Ako personally mahilig ako sa 40s-50s, kahit hindi authentic vintage yung suot ko pero styled lang minsan or reproduction.	dv7dx72	t3_8236qb	t3_8236qb
antemon	Philippines	1462878375	32	Tagalog	English	it's strange that I'm this interested in the VP race, moreso than the presidential race. sidenote: nagsimula na ang taumbayan. kausap ko yung isang parent sa school kanina. inis na inis at ang binoto daw si BBM at lumalamang na si Leni. "Talamak talaga ang pandaraya..." Di ba pwedeng ayaw talaga ng ibang tao kay BBM? Pandaraya talaga agad, ate?	d2zrsy0	t3_4iols6	t3_4iols6
avocado1952	Philippines	1539136786	33	English	Tagalog	Ganun talaga. My pospaid Globe sim is receiving SMS. Apparently, the previous owner has something to do with Education system (probably admin from a local public school). I am not replying nor answering. Enjoy lang, kasi kapag may seminar sila updated ako. Pati yung color ng team namin sa team building.	e7hmmsi	t3_9mth5c	t1_e7hm6ba
buzzedaldrine	Philippines	1508848699	46	Tagalog	English	I am currently enrolled in one right now, pero 3 months sya. Sa QC, near GMA. Pagkakaalam ko sa UP meron dinsila dun. Kaya lang weekends lang sila. Sa Mapua meron din, update ko to later pag nahanap ko yung list ng bootcamps na tiningnan ko.	dotcm73	t3_78e9xd	t3_78e9xd
Yulshus	Philippines	1510929989	39	Tagalog	English	Medyo napupuno ako ng hate netong mga nakaraang araw. Kahit yung simpleng post sa fb nung highschool batchmate ko eh iritang-irita ako. Wala naman akong pake kung bumili sya ng yogurt kasama yung family nya pero yung caption nyang *"Simple happiness... Eme"* eh medyo nag-constrict yung pupils ko. Shet, I feel so poor not being able to afford such simplicity. נ˜”	dpykduk	t3_7djux8	t3_7djux8
fidodida	Philippines	1510316404	47	English	Tagalog	Noong nabasa ko yung headline about sa PM ng Cambodia na gusto makita si Marian Rivera, yung unang pumasok sa isip ko eh customer yun hahahahahasorry! Nadala lang sa showbiz open secrets thread	dpm8ikx	t3_7c077t	t3_7c077t
badluckKiks	Philippines	1427075295	37	Tagalog	English	One thing I was nostalgic about is how simple life is during this era, sobrang simple, yung mahahanap mo lahat ng kaligayahan sa mundo sa mga murang chewing gum na may comics pa, murang chichiria yung pisong pom-poms dalawang pack, yung PISO na may kalabaw mo eh may popcola at biscuit ka na, yung mga larong lansangan, yung paliligo sa ilog dahil malinis pa, yung magnanakaw ng bayabas, mangga at s…	cpnj2zo	t3_2zrdeb	t3_2zrdeb
kixiron	Philippines	1526275190	40	English	Tagalog	I do not favor making barangay officials appointed officials. First, who will appoint? The mayor/governor? The DILG? Duterte? No to all of the above. Kung sina mayor o gobernador ang mag-aapoint, aba, mga kumpare nila ang iaapoint nila. Kalokohan yan. Magiging papet nila yan. Kung DILG o ang Presidente naman, susme, palagay mo ba makakayang mag-appoint ng libo-libong barangay at SK officials? Nas…	dyy26hi	t3_8j9nep	t3_8j9nep
Aeronautique_F	Philippines	1512539109	24	Tagalog	English	Because cheap slavery yo. Ewan ko ba, napakadali naman magtimpla ng tsaa, kailangan mo ba talaga ng taga-gawa pa nun? You just fucking put a teabag in hot water and that's it! Ganun din dito eh. Nakakatawa yung teaboy namin dito, sya pa janitor. Di ako nagpapatimpla sa kanya ng kape kasi alam ko naglilinis sya sa CR hahahah!	dqu9ct6	t3_7hvgyz	t1_dqu6452
kuyapopoy	Philippines	1529570456	49	Tagalog	English	Question, lagi kami nagtatalo recently ni misis dahil sa mga simple decisions on every day life. Kadalasan pag ako nagdecide may mga sablay sa huli. Sa bahay nyo, sino nasusunod or bigayan? Or pag nagkamali un isa ano gngwa nyo	e11eom1	t3_8sos1j	t3_8sos1j
bypaular	Philippines	1497764596	34	English	Tagalog	&gt;Maganda ka pala painumin eh. Hahaha. Actually konti lang nakakaalam ng secret ko na yan. Tahimik lang nga kasi ako usually especially sa workplace ko. Sabi nga ng isang kong workmate nung shinare ko yun sa kanya eh nagulat daw siya kasi parang hindi daw expected sakin yun na umiinom in the first place. Hahaha! &gt;Siguro pag may tanghali na mini-meetup or pre-official meetup punta ako. You kn…	dj217dm	t3_6geh8z	t1_dj208fu
spidey19	Philippines	1509072746	42	English	Tagalog	Great!! Though kids were kinda sleepy went I got home around 7pm. Got everything cept for the donuts replaced it with goldy's puto butter at home gumawa din pala sila ng pancit at carbonara nag-master race tuloy unti mga noodles, dami natira at di nagalaw. Binaon ko na nga yung tira kasama ng usual baon ko para di masayang. Woah, that's nice! I can't see myself atm wearing my pants 3 years ago pe…	doy6ozc	t3_78ywx1	t1_doy5ee2
rubyanjel	Philippines	1491561131	40	English	Tagalog	Ay, hmmm. I saw you mention brewer? Micro brewery ba ito? Oo, minsan if masyadong mataas sasabihin nila pag-iisipan nila. Pero at least may call. I guess it's to confirm if you would still like their offer that may not be as par as your expected.	dfy70hg	t3_63zgir	t1_dfy6yp5
kukote2	Philippines	1522828427	44	Tagalog	English	found out i am color blind sa medical exam ng LTO. tanong ba naman sa akin nung sa LTO, "alam mo naman difference ng green, red and yellow?" nadidistinguish ko naman yung mga colors.. di ko lang talaga mabasa yung numbers sa test nila. kapag dikit-dikit na magkakamag-anak na colors, dun nagpapare-pareho na. pero red, green and yellow, kita ko pa naman :)	dws69ep	t3_89mj8r	t3_89mj8r
Bigflatfoot16	Philippines	1504200928	47	English	Tagalog	May high school at college batchmates akong ganito. Apologists ni Marcos at in-denial sa climate change. Ewan ko ba kung saan nagkulang yung pamantasan namin. Siguro nga tanga ang mga magulang nila o kaya hindi natututuruan.	dmdwnd8	t3_6x5t1s	t3_6x5t1s
grawffsauce	Philippines	1510800203	18	Tagalog	English	Babackupan lang sila ng CHR kung hindi dumaan sa tamang proseso ang pag-aresto at paglitis sa akusado (hindi pa kriminal at this point - something na hindi maintindihan ng karamihan, to let the justice system do its thing), o kung mali ang pagtrato sa mga nakulong. Now, kung galit kayo at bakit ang daming kriminal, iputok niyo ang mga butsi niyo sa criminal justice system (DOJ, NBI, PNP, BJMP) da…	dpw1onx	t3_7d8352	t1_dpvzspn
Apocrypao	Philippines	1531630730	31	Tagalog	English	Hear me out guys here's my story. Maganda nag tuli sakin hawig ni Cristine Reyes that's all. Pros: exposed sEXCALIBUR mas madali linisan at alisin yung smegma(in my opinion and due to my laziness to pull the foreskin). Cons: Dorsal slit ang ginawa but things were fine nung umpisa pero may konting skin na tumubo tho hindi ko namalayan kung kelan kasi naexcite ako after ko madiscover na parang volc…	e2ew7pu	t3_8pq4x1	t3_8pq4x1
NoobPH	Philippines	1528775955	28	Tagalog	English	It is one thing to be friendly, and it's another matter entirely to be, in the words of Vilma Santos, *parang karinderyang bukas sa lahat (ng Tsino).* FUBU ang gusto ng gobyernong ito e. "Friends" tayo with China, kaso puro sa kanila ang benefit. Sige, may konting benefit na rin siguro sa Pilipinas, lalo sa iilang mga Pilipinong nakaluklok sa pwesto.	e0iw62y	t3_8qftb1	t3_8qftb1
memekun	Philippines	1502186902	20	Tagalog	English	Mother Moments Ep. 1: *Me and Ermats talking about Mocha Uson habang nag-hahapunan* **Ermats**: At bakit? Okay naman si Mocha Uson ha? Maayos naman siya! **Me**: Eh hindi nga niya ginagawa trabaho niya eh. Alam mo ba yung ginawa niyang article about Marawi and yung soldiers natin? (continues discussing the symbolism issue.) Dapat i-cite yung source nung picture. **Ermats**: Oh eh ano naman masama…	dlbo1fg	t3_6schde	t3_6schde
haluthere	Philippines	1508326554	42	English	Tagalog	Yes, sinabi ko sakanya na nandito lang ako palagi. Na if kailangan nya ng tulong or anything nandito lang ako. Thank you so much. Totoo yung hindi ko siya masasave, but I can love her unconditionally and be there for her throughout the process. Di lang talaga nag work.... Sa ngayon	doj8sx3	t3_775k5o	t1_doj8389
Forproject	Philippines	1548244823	47	Tagalog	English	paano ba yung smart casual dress code for men? pwede ba yung polo shirt? or kailangang "shirt" talaga? kailangan din ba long sleeves? pasensya na sa stupid question. patulong naman, yun daw kasi dress code sa new work ko	eeren2f	t3_aiy6di	t3_aiy6di
scarethekids	Philippines	1514827826	44	Tagalog	English	Some tig pipiso junkfood can be use as an ulam too. I tried some. Add toyo, kamatis and you're good to go. Nung bata ako nag ulam din kami ng mantika (used oil na pinaglutuan ng chicharon), then toyo. Damn ang sarap. Hahaha.	ds1iusr	t3_7nfre4	t1_ds1gsp7
glenfuerte	Philippines	1513947452	38	Tagalog	English	I only recognize one inaanak which is the son of a great friend who helped me through tough times. May regalo tlga sken kada taon. Ung iba na pinilit lng ako sumali, 50 pesos lng binibigay ko.	drm6flf	t3_7ld47b	t3_7ld47b
snorlaxle	Philippines	1480026243	49	Tagalog	English	Yup, possible. Pwedeng tampered yung viber app database at gawa gawa lang yung mga message. Madali lang gawin yun. Pero kung hindi nya dinedeny yung message di ko iaassume na fake sila.	daecd9o	t3_5elo53	t1_dae9141
Albus_Reklamadore	Philippines	1538114656	17	Tagalog	English	Kaya ang hirap magkwento dito sa r/ph eh. Baka dekwatin bigla yung istorya mo without permission nung isang gunggong na nagbabait-baitan, tapos ipopost sa Facebook account nya kasi likes and shares na lang ang bumubuhay sa walang kwentang utak nya. Never forget na minsang inutusan nya yung isang redditor sa Facebook na magpakamatay na lang, at nagsama pa sya ng troll army para i-dogpile yung redd…	e6s6md1	t3_9jjpjp	t3_9jjpjp
coookiesncream	Philippines	1497770862	22	Tagalog	English	Hahahah. Siguro ikaw yung mukang good boy pero hindi totally good boy kasi bully ka. Hahaha. Di ako nagkakape. Hahaha. Tapos mamaya aalukin na kong sumali sa mga seminar, papalakpak lang tapos Power! Hahaha Kung pwede lang burahin yung certain parts ng past ko ginawa ko na. But i believe it made me a better person somehow. Yun nga lang, i have to learn it in a hard way and mag-isa lang ako at nah…	dj23re7	t3_6geh8z	t1_dj22x4h
andalusiandawg	Philippines	1537945322	47	English	Tagalog	Correct. He signed it, no doubt. Cory improved it, no doubt. Pero yung iga-grandstand na naman ng fans na si Makoy ang nakaisip nito, nakaw credit na naman to. Tapos hihirit sila ng, eh di wag ka tumanggap ng 13th month. Kabobo.	e6npykb	t3_9ixc5p	t1_e6npqre
Ivyisred	Philippines	1525231410	48	English	Tagalog	Dapat di ako nakikialam celpon nya. Pero dahil pinakialaman ko na, magtatanong na ako. I cannot fulfill my SOג€™s fantasy. So kung manood sya manood sya. Doesnt make our relationship less.	dyb0yjo	t3_8gc9y6	t1_dyb0izp
krofax	Philippines	1542110395	25	English	Tagalog	Wala sanang problema kung recyclable materials ito or if the local importer had the proper permits and import declarations. Secondly, it is normal for countries that have efficient waste disposal or materials recovery facilities to import trash from other countries. However I do not think the Philippines has reached that level of efficiency yet. Ni hindi nga tayo makapagtapon ng maayos sa tamang …	e9m2bup	t3_9wng2t	t3_9wng2t
letsrockxd	Philippines	1521068527	21	English	Tagalog	Touche. You got me there lol. Maybe mag conduct sila ng interviews (situational) then if pumasa sa standards at masasabi naman na hindi basta basta yung sagot? But I think maraming masasayang na resources at di magiging accurate since it's not an objective at magiging questionable kasi iba iba ang standards ng mag iinterview.. But I don't know I'm just wondering for solutions or ways para mabawas…	dvpn8pt	t3_849d5l	t1_dvpkj02
gentlesleeper	Philippines	1520024589	41	English	Tagalog	Wow congrats! Also salamat for putting in actual numbers! This is the most practical comment in this thread. Kinailangan kong i-google ano yung SWR. I'm ^so ^^clueless Ang dami kong tanong! May I ask kung purely sa stocks lang ba yang 18M nakainvest or kung hindi, saan pa? How many years did it take you to be FI? I assume also na malaki sahod mo since 2M a year na ma-save in the next 3 years - an…	dv39ly8	t3_817iew	t1_dv34rfm
raybridge42	Philippines	1528069993	40	Tagalog	English	Agnostic theist here. A personal experience led me to my belief now. Dati kasi akong choir member, and yung grupo namin ay laging nagsisikap para hindi lang kami maging basic church choir. Masipag yung choir master namin pag practice (faculty ng UST Conservatory of Music), and ine-encourage kaming manood ng choral performance sa YouTube (UST Singers, Madz, Ateneo Chamber Singers, etc.) Problem is…	e02d7b5	t3_8o8uf2	t3_8o8uf2
gandaraparkshinhye	Philippines	1514620780	39	English	Tagalog	She was the issue why Angel and Luis broke up while they're trying to fix things pero pumasok si Jessy tapos yung attitude niya sa mga interviews niya lalo na nung nanalo siya sa FHM na parang greatest achievement niya and a lot more that's why she's totally bashed online.	dry2x0h	t3_7n012o	t1_dry2jwt
fr0stymist	Philippines	1542185347	33	Tagalog	English	saaame!! kaya himala na lang sakin kapag mangyayari na makukuha ko NBI clearance ko in 1 day. may nakapag sabi rin sakin regardless of spelling daw, kung may similar-sounding name ka chances ay HIT pa din.. pero ewan ko kung totoo kasi may kilala ako napaka common ang pangalan pero 1 day process lang sya sa NBI. Ang labo.	e9o5xvj	t3_9wwi9q	t1_e9o5lr9
EldenDawes	Philippines	1542813515	15	Tagalog	English	Nung college may thesis kami, eh ako lang yung marunong mag code noon tsaka gumawa ng flowchart kaya ako na gumawa lahat. Inexplain ko sa kanila yung code e pero di nila magets, kaya nag kwentuhan na lang kami buong gabi, the day before ng presentation. Nung presentation na ako lahat nag eexplain, kalagitnaan sila na yung pinag eexplain ng flowchart. Pucha hirap na hirap sila, nagtawanan na lang …	ea646m7	t3_9z3m6d	t3_9z3m6d
ShinnyCheeseStick	Philippines	1518060008	36	English	Tagalog	you don't get do you? once na binili ng smugglers yan ibebenta rin nila yan among filipinos, sino kikita? sila rin. &gt;more funds for the Govt to use in important projects. you really think dun mapupunta yan at hindi sa bulsa ng mga kurakot sa Gov't? I highly doubt it. Mapunta man yung iba, malaking chunk is mapupunta sa bulsa ng officials. Lastly, kung ganun lagi ang gagawin, at maging cycle, d…	dtwvzb3	t3_7vwkda	t1_dtwqsq5
HerpityMcDerpity	Philippines	1398387523	43	Tagalog	English	This is the first time na naabutan ko yung pag bukas ng daily discussion thread. Makakatikim narin ng bakasyon! Finals ko kahapon at napakasarap ng feeling para matapos na yung semester. =)	ch1bv3z	t3_23wnh4	t3_23wnh4
kielmaru	Philippines	1481979344	47	English	Tagalog	Actually yun ung plan ko dapat nung ps4 pa ung in mind ko to buy. Pero hassle kasi dami pa din gastos haha. Or baka oa lang ako. Concern ko lang is baka walang shop na nagbebenta ng ps3. Or baka biglang wala na palang tao online sa ps3.	dbb058d	t3_5itu1u	t1_dbb01en
putonginamo	Philippines	1494658102	41	English	Tagalog	ito mahirap kapag medyo "tamang hinala" SO eh. So I have this female friend, kapag nag-aaway sila ng SO nila eh, laging takbuhan niya yung fb niya, lagi siyang nagpopost ng problema nila online, for everyone to see (idk kung may chinachat siyang ibang guy, most likely wala, mga kapwa female friends niya lang). Now I was about to update her regarding about the portrait painting she commissioned me…	dhhzli5	t3_6avxoq	t3_6avxoq
angbataa	Philippines	1516964999	49	English	Tagalog	Yung vintage na laptop lang naman yung may ganyan problema. Una kala ko wireless adapter lang may problema.kaya ko naman ayusin kaya lang yoko mag ubos ng oras kung mareresolba naman ng pag click sa revert back	dt9m65x	t3_7sus9d	t1_dt94qt7
antutwerp	Philippines	1524813081	43	English	Tagalog	Kung tama pa pagkaka alala ko, ang technology na ginagamit ng MMS eh GPRS \(lower than 3G\). So google mo na lang pano setup ng GPRS. More so, sa Sim settings \- alam ko pwede mo iset GPRS ng globe dun. Pero I may be wrong, and old\-fashioned pero "nung araw" ganun kasi siste	dy1rh2l	t3_8f8zff	t1_dy1na4q
fyzcjs42	Philippines	1523272958	44	Tagalog	English	That's the thing. Kasi pati yung email support iniisnob na rin ako, after like 3-4 replies pag nalaman na nila kung gano ka sensitive yung problem namin eh di na ako nirereplyan. Tapos gagawa nanaman ako ng bago and sobrang scripted ng mga email nila.	dx2bh30	t3_8ax9kh	t1_dx2bchx
tanginayeah	Philippines	1516941116	36	English	Tagalog	And to add to my previous reply pala, before he came here I volunteered my place (more than 10 friends ko na napastay ko sa flat ko dito when they're in town) and napagusapan namin na magwawalwal siya (hookup, binge drinking, etc). Back then, tanggap ko na walang mangyayari samin since sampung taon ko na kaibigan yun. I was just hoping na meron, pero not expecting. Okay na sana eh. Kaso, may nang…	dt9aclp	t3_7szprx	t1_dt99boj
Prince_NoctisFFXV	Philippines	1527508275	28	English	Tagalog	lost my uncle today. told my fam that ill attend one burol only. i won't attend the libing. ayoko na kasi ng ganon environment. napagdaanan ko na sa mom at kapatid ko. so ayoko na pagdaanan ang grieving process. uncle, sana maintindihan mo na fragile ako. sorry kasi naging bitch ako sayo one time. pero you always have good intentions and medyo bilib ka sakin ng konti... thanks uncle sa pagdalaw m…	dzpcqsq	t3_8moxsp	t3_8moxsp
eleice	Philippines	1537463047	48	English	Tagalog	Para sa akin, oo. Hanap ka ng journals/books na magsasabi kung bakit plastic ang appropriate variable sa study mo. Plus points sa panelists at readers kapag well-supported yung research mo ng references. Pero kung wala ka namang mahanap na past studies na gumamit ng plastic as variable, pwede mo na lang banggitin yung plastic sa methodology. Just make sure that your RRL discusses different studie…	e6bsorn	t3_9hgfqb	t1_e6bo20i
G40-ovoneL	Philippines	1512387635	44	English	Tagalog	Pwede po pa-ELI5 ng purpose nya? Nabasa ko kasi na ginagamit sya para ma-cast (di ko po sure yung term, lol) yung mga streaming service sa TV. What if hindi po yun yung gusto kong gawin and gusto ko lang i-display kung anong nakalagay sa screen ng laptop ko papuntang TV? Can I use it po for that?	dqqtsma	t3_7hgdpi	t1_dqqtj0c
djalskdj	Philippines	1527010691	44	English	Tagalog	Went to a Catholic highschool. There was this batch na lower samin na nalink sa teacher namin (Young, cute and very mahinhin). One with a girl (mej tibo-in sya[bi I supposed?]) and with a guy(allegedly naging sila daw). May time narin na nung batch swimming nila, sumama si teacher with the lower batch tapos nalaman nung asawa ni teacher na sumama sya tapos nagwala yung asawa ni teacher sa resort …	dzeblrg	t3_8l9xtv	t3_8l9xtv
audaku	Philippines	1484730297	49	English	Tagalog	Most likely kailangan bayaran yan kasi hindi yan parang tubig na babayaran lang kung anong nagamit. Especially since nakalagay sa contract na fixed amount ung bill whether may ginamit ka o wala.	dcktjjd	t3_5onotd	t3_5onotd
lordaesong	Philippines	1528353849	49	Tagalog	English	&gt;Indifference will be their undoing once inflation makes its way to strangle their wallets and purses. Kahit di na maka afford ng pagkain mga pilipino sisihin na lang ng 16 million mga dilawan instead of papa dutae and his train law and $150 billion loan at 10% interest a year kek	e097jbz	t3_8p11y0	t1_e08ywao
powerkerb	Philippines	1492632794	49	Tagalog	English	masama lang daw kapag uminom ka ng ice cold water kapag dehydrated ka. shock daw sa system mo. imagine a sudden drop of temp to your tummy. Wag naman lukewarm ibigay mo, room temp is fine. #notanexpert #notajournalist	dghfpbq	t3_6698bo	t1_dggwuut
throow12	Philippines	1544115758	30	Tagalog	English	Daming magandang tackle ni Aguinaldo from behind na inside the box. Kung ginamit lang sana siya nung 1st leg, but I guess wala akong karapatang kwestyunin yung mga choices ng manager hehe. Asian Cup next! di rin naman ako umaasa ng kahit ano dun, basta sana mauwi nila yung experience na yun sa local leagues then mag spread sa grassroots.	eb82m6h	t3_a3oc71	t3_a3oc71
sosyalmedia94	Philippines	1477756026	33	English	Tagalog	who the hell offers their house for Airbnb and acts as if they don't want guests in their house... that's a horror story for someone who just wants to travel you know. Yung tipong gagala ka labas papakasaya tapos pagbalik mo ng bahay instead na magpahinga ka pagagalitan ka pa ng host? lol	d9cts8i	t3_5a07u8	t1_d9cssv0
tenth_	Philippines	1424494738	39	English	Tagalog	Had a date kanina. Ok naman siya. Hindi lang talaga Siguro match. Fourth straight week ko na puro dating. Ganito pala, nakikita mo mga different insecurities ng tao, mga hang ups nila etc etc. Masaya, I think I'm getting better at it, but haven't met anyone yet that I'd want to take to actually start seeing regularly.	cos913c	t3_2wlcgt	t3_2wlcgt
totoydamo	Philippines	1523289930	32	Tagalog	English	donate ka na lang sa pinakamalapit na gov't hospital sa area mo mas sulit, make sure na may pahinga kang maayos bago magdonate, no alchoholic drinks for 24hrs wala ring ininom na gamot. uminom ng maraming tubig! pagkatapos magdonate pahinga ka uli mahihilo ka pramis bring id's, dahil dyan parang napaisip din ako makapag donate nga uli ~~sana makapagleave para may pahinga~~	dx2qewp	t3_8atgu9	t1_dx1e354
vidaljames	Philippines	1479061880	44	English	Tagalog	lucky for you pero i dont really like paying it knowing nakikisawsaw nalang so maraming issues dadarating maybe sa downspeed not being relaible. pldt pa naman known for having a really bad service lalo na sa kanilang customer service. sakit sa ulo ata aabutin ko jan haha. mag wait lang nalang ako sa globe na matapos ang kanilang pag lalagay ng fiber boxes dito samin. kaso lang once im spying ther…	d9yoq66	t3_5cq0g8	t1_d9yf4s8
limewithtwist	Philippines	1438753706	33	English	Tagalog	slight ot: si janet napoles na ba ang basehan natin for being bad? at least, she wasn't so bad at pinapatay niya si Benhur, which would've save her a lot of trouble. wala lahat ito kung nawalang tuluyan si benhur. back to topic: at least aware ka na sa pangit na gawain ng nanay mo. if you see yourself doing them, you still have time to correct it.	cts19ju	t3_3fqapr	t1_ctr01rn
Mr_Loophole	Philippines	1510567264	46	English	Tagalog	Inconsiderate si friend kung di niya sinabi sayo. May unwritten rule naman na don't bang your friend's ex eh. Kung di ka na nakikipag-usap kay ex, iwasan mo nalang yung so-called friend na yan.	dpqxa1a	t3_7ckjt1	t1_dpqvrbh
angbaboybow	Philippines	1469246398	16	Tagalog	English	my favorite jeep story is when 4-5 guys tried 3 different modus on 3 different people AT THE SAME TIME.. yung nagtatakip ng bag para nakawan ka, yung maduduraan yung balikat mo para di mo mapansin yung bag mo, tas eto yung laglag barya. ako ung target ng laglag barya, tas dalawang babae dun sa iba. sobrang obvious kasi nilang lahat, lalo nung laglag barya kasi ramdam ko naman na pantalon ko mismo…	d5na3sm	t3_4u3snp	t3_4u3snp
feedinglim	Philippines	1517999576	44	English	Tagalog	Nakapanood na ako ng gumagawa ng parang cabbage from a plastic like substance tapos iroroll at magiging mukang totoo. Most likely asian country *ehem china	dtvchvm	t3_7vsj5s	t1_dtv3oto
thenameisgsarci	Philippines	1516876940	10	English	Tagalog	Also, walang minention sa batas natin ang pagbabawal sa pakikipagsex sa sariling clone. *Articles 37 and 38 of The Family Code of the Philippines state that marriages between ascendants and descendants of any degree, and between brothers and sisters (whether of the full or half blood) are incestuous and void from the beginning (whether relationship between the parties be legitimate or illegitimat…	dt7opq2	t3_7sv2y3	t1_dt7oaro
periwinkleskies	Philippines	1540048154	45	English	Tagalog	Haha thank you! Will keep this in mind! The rest naman will go home and baka ako and a few friends will sleep doon. Worried ako na baka makita nila ang daming taong pumapasok + the noise. נ˜‚	e84ep73	t3_9puqu0	t1_e84ejf3
a6000	Philippines	1475026204	45	English	Tagalog	naging in-demand naman talaga sila. pero 2010 late na yan, ginamit na lang yan nang mga schools at review centers para kumita. I think around 2000-2005 yung demand talaga tumaas, after that andami na masyadong nursing grads.	d84xn41	t3_54t2n1	t1_d84wrk1
nyawakapoya	Philippines	1528098493	39	Tagalog	English	Mama niya tumawag gamit number niya. I even declined the first call, pero nag-text Mama niya saying na sagutin ko daw kasi di naman si ex ko yung makakausap ko. Di ako naka-decline kasi nagpromise ako dati pa na I will be there sa birthday niya, kami pa ni ex nun that time.	e02ylfp	t3_8oed5h	t1_e02ybm4
ghostemane44	Philippines	1509573689	21	English	Tagalog	Good morning! Hingi lang sana ako ng advice hehe kasi wala na ako ibang malapitan and I don't know what to do. A few days ago, I broke up with my SO because I got sick and tired of her treatment towards me. I was feeling under the weather that day, pero umalis pa rin ako at nakipag-meet with friends kasi sa sobrang frustrated ko sa nangyari sa amin. Ang di ko alam is pumunta pala siya sa bahay na…	dp7lauh	t3_7a6wpj	t3_7a6wpj
pmmeurmoney	Philippines	1545924858	48	Tagalog	English	Woohoo naperfect ko na yung low sugar leche flan recipe ko gamit kong gatas ay fortified milk. Mga previous kasing okasyon hindi masyado makakain sila lolo at lola ng handa dahil sobrang matatamis kaya nag-effort akong mag experiment para masaliksik ko yung tamang recipe.	ecnvlgq	t3_a9xy3g	t3_a9xy3g
Redditus_Genericus	Philippines	1510886085	16	English	Tagalog	Leave her. 1. Makakakuha ka pa ng sakit jan. 2. You gonna be seen as a cuck 3. You gonna lose your dignity 4. Do you really want to marry a girl who have fucked hundreds or perhaps even thousands of other guys 5. She wont stop doing it. Madaming walkers na nagkatrabaho at tumigil sa pagwowalk. Pero mas malaki talaga kita nila sa pag wowalk kaya either sinasideline nila or fulltime walker ulet. 6.…	dpxv2po	t3_7dgcjb	t3_7dgcjb
ch0knat	Philippines	1514548082	29	Tagalog	English	I admire people like you. I mean you're practically funding your own college fees, that's something to be proud of. And I think na may mahahanap ka ring lalaki na kaya tanggapin. Hindi nga lang magiging maadali pero makakahanap ka pa rin. GL OP, konti na lang College Graduate ka na. &gt;Never forget what you are, for surely the world will not. Make it your strength. Then it can never be your weak…	drwlgxy	t3_7mtgbn	t1_drwkg5z
gattacattiva	Philippines	1472212817	44	English	Tagalog	Kung nangyuyurak ka na ng pagkatao ng ibang tao hindi dapat nag-e-end na ang right to speech doon? Ginagawang excuse ng mga bully ang freedom of speech para mag-death threat at mang-insulto.	d6xdn69	t3_4zlphh	t1_d6x7lxx
gt4crazy2	Philippines	1427080020	37	Tagalog	English	member ako dun, as far as i know, di na yata sya nagaayos. focused sya sa photography ngayon. pero try mo pa din. baka mga tauhan nya gumagawa pa. buhay pa yung pinoyps. karamihan sa admins kasi working. baka sobrang busy. try mo contactin si royginald sa facebook: Ronald Royginald Fortaleza.	cpnljzr	t3_2zz1wz	t3_2zz1wz
kuzu-ryu-sen	Philippines	1489972004	34	English	Tagalog	Yes, same with my location as well. Cat-calling and other forms of harassment are still rampant, and I think it became even worse than before. Napapansin ko sobrang daming naipo-post sa social media ngayon na videos ng naglalabas ng mga ari and what not unlike before. Somebody may disagree with me, pero ang dami kong nakikita sa newsfeed, barker, matatanda, nagpapanggap na tulog and posts are rec…	df5jj8o	t3_60b5xh	t1_df5haq7
motherofdrogonseu	Philippines	1501673016	41	Tagalog	English	Jejomar Binay said (sa isang interview) "In situations and issues requiring immediate actions, like the traffic crisis in MM, the President should personally exercise full supervision over all the concerned agencies of Government." I agree with this. Kasi ayun nga major issue 'to at ito na lang lagi ang halos problema ng mga Pilipino (araw-araw). So dapat makialam na rin ang President. (LOL)	dl20296	t3_6pmzkw	t3_6pmzkw
coookiesncream	Philippines	1529201500	49	Tagalog	English	Ako ba to? Haha. Almost same question tayo. Hahaha. Biogesic is much easier na ngayon since hindi na sya bilog unlike before. Pero pag sinabayan ng other meds, halo-halo na yung lasa sa bibig at lalamunan.	e0su6g6	t3_8rml59	t1_e0sr58o
ggvelasco	Philippines	1538132642	40	English	Tagalog	&gt;disipulo dito Yes! I thought ako lang nakapansin neto pero i think my mga disipulo nga to dito. Pag nakikiargue ka sakanya dito, may downvote brigade. Pati yung previous posts mo madodownvote. Ive always thought of him as papampam. Feels good, man. Hahaha	e6sfrao	t3_9jlmru	t1_e6seeuu
salvatoreguiliano	Philippines	1492965887	33	English	Tagalog	ג€I suspect the truth is that we are waiting, all of us, against insurmountable odds, for something extraordinary to happen to us.ג€ - K.H. Are we really just wasting our time waiting for some kind of a 'push' for that which we really want to do but don't have the motivation/courage to? Ewan ko ba kung pano iinterpret yang linya ni Hosseini. Cheers sa mga lasing na at tapos na mag inom at mag i…	dgna744	t3_672xzj	t3_672xzj
ElochQuentis	Philippines	1515733890	33	Tagalog	English	I beg to differ. More of a middle-class/lower-middle condition siya. You tend to eat more kasi mas sulit. Sa buffets ang mayayaman walang pakialam masyado sa bayad and puro salad bar lang kasi may minemaintain na figure. Others, yung gastos ang iniisip kaya kain nang kain at lahat gustong matikman.	dsk482a	t3_7ptz5q	t1_dsk390i
Riesig19	Philippines	1453572656	20	English	Tagalog	This is a gold mine of retarded journalism and small issues turning into national ones. Pake natin kung may kaibigan at kamag anak si Duterte na bakla, pake rin natin kung bakla si Duterte dati. MERITOCRACY ANG POLITICS. Anyway, the party line he's towing is unequal. We've already given a certain religion special rules on how many they can marry, therefore nullifying the absolute connection of ma…	cz94h1g	t3_42brrk	t1_cz946az
[deleted]	Philippines	1408865157	31	English	Tagalog	Medyo far-out siguro ang sagot ko pero ayaw ko magkaroon ng anak (I'm a guy), for one reason: I don't want them to suffer the kind of suffering we have. If we're barely surviving with 50 pesos, paano pa kaya in how many years? Even if I get a stable job, I'd be skeptical about survival. But the animal in me is telling me I need to propagate the clan.	cjyyxmu	t3_2eeblq	t1_cjywnm3
codevil	Philippines	1488889651	21	English	Tagalog	The other day, bumili ako ng magandang notebook sa Scribe so I can write personal essays in it. Minsan kasi hindi ako makatulog sa gabi dahil gusto kong magsulat about sa lahat ng mga bagay na natutuhan ko sa buhay during my early 20s (I'm still in my 20s pero nearing 30 na). And then kanina naisip ko na sa laptop ko na lang i-type, and then sell it as an e-book, but make it available online for …	dem5n0t	t3_5xzjc3	t3_5xzjc3
chocolatemeringue	Philippines	1550030115	49	Tagalog	English	Hinala ko lang ito, don't consider my answer as definitive. Yung iba---again, et me emphasize, yung iba, hindi lahat---sa mga Pinoy na nakapag-abroad, siguro first time nila noon na makapag-abroad *and* at the same time nagkaroon sila ng opportunity na tumira dun sa bansa na iyon (whether the US, Canada, Australia or anywhere else...for the rest of this comment, let's say galing Amerika yung tinu…	egcya3c	t3_aq2606	t3_aq2606
koyapres	Philippines	1483513611	36	Tagalog	English	Tini Wini! Nami-miss ko din 'to. Tho may equivalent naman nito ngayon sa atin (Sumo), pero iba pa rin ang Tini Wini! I have a very funny story about these from my childhood. Nung bata ako, nakakita ako ng iniwan na Tini Wini sa sementeryo, tapos kinain ko. Nakita ako ng mga pinsan ko, sabi nila dadalawin daw ako, bakit ko daw kinain 'yung "Tini Wini ng patay". So iyak ako. Hanggang ngayon hindi d…	dbz9foe	t3_5lusxf	t1_dbz8ycw
avonie	Philippines	1519092853	19	English	Tagalog	Lumaki kami ng brother ko (babae ako) sa Canada at alam ko na pagtutuli is a big deal sa Pinas. Pero as we grew up dito sa ibang bansa, hindi uso ang pagtutuli other than sa mga Filipino at Jewish communities. At lumaki brother ko making his own decision if he wants to or not, at ayaw niya talaga. We respect his decision at I agree na it has be the person's choice. I didn't think this at first, k…	duit7v7	t3_7yl1rk	t3_7yl1rk
KappaccinoNation	Philippines	1512554609	40	English	Tagalog	UST and UST. Di naman daily dream school ko siya, pero yun lang talaga yung malapit so di ako tinamad magsubmit ng requirements or mag exam. Unlike sa La Salle na ready na lahat ng requirements ko pero on the last day of submissions, tinamad akong pumunta.	dqug6zt	t3_7hx2g7	t1_dqug4mh
lostingrace	Philippines	1546708318	43	Tagalog	English	Hindi ko rin alam. Dati nung kami pa Lang ng kapatid ko at brother in law, pag nagluluto ako, di nila ko nakain. Hanggang sa ako na lang kumakain. Hindi rin nila tinatry. Lol. Although yung parents ko, wise. Pag may okasyon, say Christmas or new year, ג€oi ne (they call me ne because Iג€™m the youngest in the family), ang sarap nung spicy crispy beef mo. Tsaka pag ikaw nagluluto ng leche flan, m…	edb7s8i	t3_acsv1p	t1_edb7a22
TILTILTILT	Philippines	1537616848	44	English	Tagalog	try mo nga to. gawa ka bagong wifi ssid tapos ibahin mo yung wpa settings. ang 3ds ko dati hindi maka connect then kinalikot ko lang yung settings sa wifi and naka connect ako. or eto medyo hindi elegant na solution bili ka ng mahaba na ethernet cable hehe	e6fjiq9	t3_9hwld7	t1_e6fhuft
xbakednotfried	Philippines	1521556607	18	English	Tagalog	Thanks for replying. Also another reason why I want to get as much opinion as possible regarding this matter is that Im not really that informed about this things. Akala ko ok na yung LTFRB and yung Grab and Uber mukang hindi pa pala. Yung tungkol naman sa monthly amortization ng sasakyan if kung totoo yung sinasabi ng mga drivers na naka usap ko in 2 weeks time daw (or even less pa nga) kaya mo …	dvzu3cg	t3_85elg0	t1_dvzj2y6
chocolatemeringue	Philippines	1545976555	27	Tagalog	English	*(smh)* Naalala ko yung mga tatanga-tangang nagcomment dun sa post sa FB account ng Thinking Pinoy. Yung me picture ng open letter galing sa parents ng bullying *victim* sa Ateneo. Trigger-happy masyado sa panlalait thinking that the letter came from the parents of the *bully.* But that's not all: nung pinoint-out ng ilang tao na galing sa victim's side yung letter...sila na nga 'yung mali, sila …	ecpn25o	t3_aa6s9w	t1_ecpgalt
lunargeass	Philippines	1550040520	42	Tagalog	English	na experience ko rin yan OP. sakin naman narinig ko pa siya na sasagutin nya na ko on a particular date suddenly kumambyo kasi nakipagbalikan si ex. few years later we met again nagbreak din daw ulit sila nung ex niya kasi she kept on comparing me to him	egd8dyr	t3_aq3gd6	t3_aq3gd6
ILikeFluffyThings	Philippines	1476972511	28	English	Tagalog	Bulag ka ba? He is severing ties with the US because he is in service of the Chinese. Malaki kasi tulong ng US sa region to check China's aggressive disregard of international laws. Look, halos lahat ng katabing bansa ng China buwishit sa kanila dahil sa encroachment. In short, Duts is not severing ties with US because we don't need them but rather because he wants to please the Chinese governmen…	d90alkn	t3_58g0py	t1_d905yxo
eyakeya	Philippines	1546488794	43	English	Tagalog	Fibrella na tig700php++ na double lining and automatic. Mine can last for 4 years. Ingatan lang kapag tag-ulan kasi matakaw sa mata ng mga magnanakaw, kaya dapat nasa loob siya ng bag madalas, at hindi dun sa pouch sa labas.	ed4mnyu	t3_ab0erb	t1_ed4mave
natchioz	Philippines	1465649546	27	Tagalog	English	Does anyone remember this really old Chippy commercial na naghahanap silang mag-barkada ng pangalan ng banda nila? Tapos pagbukas ng isang guy yung Chippy parang ang galing ng naisip niyang pangalan 'tas sinabi siya, "KAMI ANG TEAR HERE!" sabay nag-rock and roll. One of the funniest commercials ever, tbh.	d44tinv	t3_4nkujm	t3_4nkujm
dmnitdnl	Philippines	1531723235	19	English	Tagalog	Maaga siyang nabuntis, 18 lang siya nun. So when I was born she kept on blaming me why she wasn't able to finish her studies. I swear this woman is crazy as fuck. Nangbabato siya ng plato, baso or kahit ano man mahawakan niya tuwing mag aaway sila ng jowa niya and even locked me in my room and tried to burn me alive (ginawa narin niya yan sa tito ko) and I was only 10 years old that time. So ayun…	e2gwib2	t3_8z7rn0	t1_e2gvu88
antemon	Philippines	1539046357	42	English	Tagalog	Two thousand pesos a year. Let that sink in. 2000ֳ·365=5.4794 Limang piso kada araw ang binigay para sa educators. Mas malaki pa ang kita ng namamalimos sa lansangan. Mas malaki pa kita kung sasakay ka ng bus at maghahanap ng nahulog na barya sa ilalim ng upuan. You should be outraged. Instead you are asking "Magkano ba dapat sir?"	e7fb7ld	t3_9mfb1h	t1_e7efooe
8GatesOfdrunkness	Philippines	1520580359	49	Tagalog	English	Kwento niya, 3 days na daw siyang piga piga kasi manual yung oxygen ata, tapos lumakas na daw si baby nakakalaro na and everything daw, tapos kelangan nga suction, mahaba daw napasok after tanggalin, right after tanggalin baby can't breathe na.	dvf6axa	t3_833tk0	t1_dvf65fp
sunnynightmares	Philippines	1535557251	39	English	Tagalog	The hospital has been through a lot of issues and marami nang nag-shame don na mga patients sa mga nurses and doctors kasi public hospital e. Hindi rin nila maintindiyan na may system/protocol na kelangan sundan. Kaya ganyan ang issues. My ate wasnt the first one who was nurse-shamed pero I think siya pinakaunang nagdemanda.	e51h1qk	t3_9b6esa	t1_e515jc2
framoot	Philippines	1471504154	37	English	Tagalog	kung maulan di ka pwede umakyat, kasi baka may lahar warning. ginagawa ng mga tag legazpi, walking walking sa boulevard taking pictures... alam ko may atv... tapos there's this falls you can go to and some little hills that are kinda like chocolate hills... legazpi is just for pictures, not activities that's probably why your friend got depressed	d6mbk3m	t3_4y6ohv	t1_d6maxs2
rageofthemike	Philippines	1486908655	41	Tagalog	English	f'k the philippine entertainment industry. ina niyo, kaya ang bobo ng mga pilipino eh. EDIT: sorry medyo harsh ata initial comment ko. Nakaka disappoint lang na laging ganito nalang ang subject matter ng mga palabas dito.	ddncx9b	t3_5tkmjy	t3_5tkmjy
merdionesmondragon	Philippines	1497360673	49	English	Tagalog	uy ayan ha, done with my charity work, tinulungan na kitang makaquota... ambag ko na yan sa iyo, para naman may bonus ka hindi masyado masaklap ang buhay mo ... kahit papano makakain ka ng pride cheken sa sweldo, kahit one piece lang.	diuc2kw	t3_6grtcf	t1_diuc004
blablaer	Philippines	1465561694	24	Tagalog	English	I stopped trying to remember my dad's age after he reached 60. Nagulat na lang ako kanina nung nalaman ko 68 na pala siya and *still* being the main provider of our family. 5 terms pa ko bago magtapos kaya parang napressure ako bigla. Promise talaga pag nagtatrabaho na ko, sakanya ko ibibigay kalahati ng take home pay ko para makaenjoy naman siya. Kahit toyo at kanin nalang ulamin ko araw araw. I…	d43jgb3	t3_4nflgj	t3_4nflgj
rawru	Philippines	1507524510	25	Tagalog	English	Yung great granduncle ko soooooper yaman daw. Millions of hectares daw pag mamamay-ari nya somewhere near Davao (Sta. Cruz, I think?). Nakita ng relatives ni papa yung titulo ng kalupaan nya at pinaverify so ayun legit nga. Kaya lang ang daming umaangkin. As in kakalabas lang ng docs from court, may duplicate na daw agad yung mga umaagaw. Marami na ding parts ng lupa dun ang naibenta e at ang din…	do3xpaq	t3_75574i	t3_75574i
Rudeboy001	Philippines	1521396669	21	English	Tagalog	Heto na naman tayo sa "po at opo" conundrum. Deputa, let the parent teach how to raise their children. Kung sa tingin nila saying these unnecessary things to convey respect is acceptable then let them. But do they really know how to show real respect. Respect of one's comfort, convenience, time, and well-being being displayed enough? Then we're all good. But to show up 1-2 hours late while spouti…	dvwgnk7	t3_859fg1	t3_859fg1
surpanakha	Philippines	1538409432	38	English	Tagalog	Hidilyn is hardly amazonian tho. The girl competes at 53kg. Sheג€™s a weightlifter, not a bodybuilder. I digress. Basta yung mukhang kapani-paniwalang makikipagbakbakan.	e6z2b0v	t3_9kbhqt	t1_e6yglns
poetmars777	Philippines	1465817004	35	English	Tagalog	Gents who are accompanying their SO in some shop, have you ever made eye contact with a sales clerk complete with mental telepathy ala "don't you dare sell more" and it worked? Imbes na mag-upsell or mag-offer ng iba pang products si seller eh parang nakuha sa killer eye. Funny, feeling ko ganito palagi. XD	d47638j	t3_4nuxoq	t3_4nuxoq
NabsGTV	Philippines	1524961065	49	Tagalog	English	Any audiophiles here? What in-ear earphones would you recommend? I prefer sana yung may in-line mic na kasama. Pero ok lang din kung wala. I checked SoundMagic's ES20 pero parang walang mic, although madaming nagsasabing maganda sound quality nito. Thank you!	dy50uqp	t3_8e6lqa	t3_8e6lqa
keep_your_name	Philippines	1536153059	32	Tagalog	English	Parking in front of the gate to the point na hindi na kami maka daan. Yung isa na man, binubuksan gate namin pag wala kami tapos dun pinapakain ang aso nila. Pagkabalik namin, yun, bukas ang gate at ang kalat. Then thereג€™s another one na ginagawang sampayan ng rug at sapatos yung fence namin. Pag sinita, sila pa yung galit.	e5fkc9s	t3_9d565z	t3_9d565z
killswitchXengage	Philippines	1515251564	49	English	Tagalog	How I wish, pero parang it's too late na. Dumaan na ang pasko at bagong taon eh, mas lumala lang ang disconnection, couple with the lingering sadness na dala ng holidays.	ds9yj44	t3_7oiflk	t1_ds9yab5
sveshten	Philippines	1547730852	42	Tagalog	English	I think we'll be mature enough naman to say na "ah this isn't going to work" or something like that haha masyadong harsh yung pag ditch naman. Syempre multiple dates aabutin niyan tapos kung wala talaga, eh di straight up sabihin hehe.	ee9q9y9	t3_agw8aw	t1_ee9q1cw
cantider	Philippines	1458542209	36	Tagalog	English	Im not sure if this is legit pero ito ung mga kumakalat na balita dati. 1. Ung kay anderson cooper na sinabi nya na no sign of leadership, nakaaway pa nya si korina dahil dun. 2. morethan 1 week na may mga bankay padin sa kalye. 3. Ung mga donations galing sa ibang bansa sobrang tagal bago makarating sa tao, ang dami nabulok sa sobrang tagal. Ung iba hinihingan pa ng tax. . . 4. Sinisisi nya ang …	d17loh1	t3_4bb6ga	t3_4bb6ga
bastos_bibig_ko	Philippines	1523258327	34	English	Tagalog	Ganda rin ng price lol.. try some unknown chinese brands though. some are really bang for the bucks.. like Superlux HD668b. Meron akong shure se315 IEM pero yung 2k kong superlux, mas maganda tunog. although, magka-iba sila ng category.. yung isa IEM, yugn superlux semi open headphone.. pero panalo sa tunog. konting modification lang .	dx255bm	t3_8aw9kh	t1_dx24bqb
Not_TheSameMe	Philippines	1523280009	39	English	Tagalog	Wala na kong motivation in everything that i do. Ang hirap gumising araw araw na hindi mo alam kung ano na ba yung ginagawa mo sa buhay mo. I dont even know kung anong plano ko. I feel so lost. I can't find the "why" in my life, even the thing i believed in doesn't make sense anymore. What will i do, any advice?	dx2gcdb	t3_8ax9l9	t3_8ax9l9
enseeelvee	Philippines	1541096727	47	English	Tagalog	Ngayon lang ulit ako pumunta sa bar dito saג€™min tapos kaloka yung CR nila, nasa labas na yung urinal bago makapunta sa toilet for girls. So may possibility na bago ka pumasok sa girlג€™s CR, bubungad saג€™yo mga tite. Lol nubayan.	e8v3au7	t3_9tanyz	t3_9tanyz
kum1ko	Philippines	1521278739	45	English	Tagalog	May mga clips daw kasi na sinama yung 911 call. Dox- potential daw ata? Basta palaging tine-take down yung mga clips related sa kanya. Although hindi sure kung yun talaga reason for taking the sub down.	dvu9sta	t3_851cmi	t1_dvu9piw
ThePaternalOverseer	Philippines	1445767006	49	English	Tagalog	Nice. I've dabbled a bit with rpgmaker and renpy before (during my weab days) so mejo may idea ako kung pano gamiting sya. Pwede 'to. Anyway, san nya binibenta yung games nya? Also, pwede makakita ng sample?	cwc1ie7	t3_3q2w0a	t1_cwbyn58
ChiPepay	Philippines	1522656976	39	English	Tagalog	Him: kung tatanggapin mo ko at papatawarin pwede bang tayo nalng ulit. Me: pag iisipan ko muna masakit ginawa mo (after few days) Him: FB relationship status: in a relationship (with one of his higads.) WOW MAGIC!!!! :( :( :( pengeng will para di ko siya saksakin ng icepick!!!!	dwnz85d	t3_88ucwd	t3_88ucwd
kaputanginahan	Philippines	1547312991	43	English	Tagalog	Tenses and preposition yan talaga yung sobrang nahihirapan ako, pero sa vocabs merdyo ok naman kasi kapag may words. ako na hindi alam sinesearch ko agad, minsan nasa notes ko pa at may reminderנ₪£ anyway thanks for the advice have a great sunday.	edwjjuy	t3_af8kry	t1_edwihtt
EnterTheDark	Philippines	1502281255	33	English	Tagalog	You're middle-aged, pwede ka sana sa titas of manila pero masyado plain ang fashion style mo. more on the tall side ka at puro light make-up lang ang nilalagay sa mukha. may glasses ka pero reading glasses lang, medyo nilalagyan mo ng style para di ka masyado plain tignan. mahilig ka sa high waist dress pants	dldinq9	t3_6skgl8	t1_dldhd5g
c51478	Philippines	1534138574	46	Tagalog	English	Pansin nyo ba, karamihan nang mga siga nung elementary at HS, sila yung maraming selfie at humble brag sa FB. Taena nakak sawa mukha nila inunfollow ko nga haha. At this age they are still longing for validation and attention.	e43kxwd	t3_96v5el	t1_e43inbz
Aeronautique_E	Philippines	1480490518	41	Tagalog	English	Family-only. Dito sa KSA, may segregation between the genders. May male and female only na shops, so yung family-only shops para sa may mga mag-asawa lang. Pag single ka, di ka pwede pumasok sa mga ganung shop. Aarestuhin ka ng religious police.	dalrss2	t3_5flkaf	t1_dalrh3m
lostmomat28	Philippines	1548691944	30	Tagalog	English	Theres this guy Im dating. He likes me daw kaso di pa siya nkaka move on sa ex niya. Were dating. Tapos lagi kami magkausap from morning until mkatulog kami. Sabi niya gustong gusto niya daw ako pero ayaw niya ko gamitin para lang mka move on. Hindi niya ba narerealize na ginagamit niya na nga ako? At sinasabi niya lang yon ksi ayaw niyang commitment? Any thoughts?	ef6jz7z	t3_akoqey	t3_akoqey
Bmweoth22	Philippines	1541352886	49	Tagalog	English	Pablotter mo sa barangay para dun kayo magusap at may pirmahan yun at may saksi, remember pag pera ang usapan umiiba ang tao maski kapatid, kamaganak lalo na kaibigan.	e91jtxk	t3_9u2nej	t3_9u2nej
mahindoria	Philippines	1484786771	26	Tagalog	English	Kahit hindi na sya magdeklara ng martial law, Kasi yung ginagawa nya ngayon parang hindi PA ba martial law katulad ng pagpabor sa mga pulis Kung nakapatay ng inosente, walang Pake sa SC at Congress, paboritong salita nya ay "patayin". Collateral damage lang yung mga nakidnap hayaan lang sila mamatay mga baliw na fanatic nya na Masaya sa mga sinasabi nya kahit nakakabahala with matching applause p…	dclwx9h	t3_5op4dl	t3_5op4dl
halelangit	Philippines	1537411090	43	English	Tagalog	Hindi mawawala yung mandatory "Plan Your Retirement" posts. Huwag ako. Titira ako sa bundok pagtanda ko, magtatanim ng sariling pagkain. Pwede siguro ipambili ko ng solar panel, but radiation fuck. Probably should isolate myself against electronics when I'm older.	e6anhoa	t3_9h9h8e	t1_e6an80d
jopaymc_	Philippines	1510051556	17	English	Tagalog	Yung sugarcoat type of girl. Yung liligawan mo then out of nowhere she'll give you the "Di pa ako ready", "Gusto ko muna mag-aral", "Natatakot ako masaktan" routine. You know you can actually say na di mo type yung nanliligaw sayo. Di ka obliged sagutin porke't niligawan ka. Forget hurting their feelings the person is being rejected of course it'll hurt. Maybe for a week maybe for a few minutes b…	dpgvb8q	t3_7bbdu2	t3_7bbdu2
otistic	Philippines	1512975719	47	English	Tagalog	Communist state is an oxymoron. Di ko gets kung bakit yung mga critic ng communism most likely di naman alam talaga ang communism. Let me guess, "Communism killed 100 million" shits like that. Walang matinong discussion dahil uninformed or informed nga puro propaganda naman kinoconsume. Tapos good on paper daw at muh human nature di man lang na kaisang page sa mga libro ni Marx. So kung gusto mo …	dr2rhi8	t3_7izzh1	t3_7izzh1
bayanihan-spirit	Philippines	1527584997	17	English	Tagalog	Ang pagkaalala ko, unang lumabas yung trapoe vibes ni grace on how she handled the iglessia issue when leila de lima was investigating the EVM fam scandal... media tried to get grace poeג€™s side, and ang dami nadisappoint kasi she played it safe. Where people alam naman obvious yung INC corruption, di tinira ni grace. Propa to d5 for sticking to her guns. I think it worked well in her favor and …	dzr6m0a	t3_8mxdex	t1_dzr6gzv
pawedbear	Philippines	1503354724	49	English	Tagalog	I'm feeling down at work a lot lately. I have this colleague na sobrang bibo, na kahit lamang ako sa tenure eh siya hinahanap ng mga tao. Feeling ko naging halaman ako bigla.	dlxz8fw	t3_6v6emx	t3_6v6emx
[deleted]	Philippines	1469274644	18	English	Tagalog	Lucky for me, I'm at the other side of that spectrum. My parents never had to ask money from me, and they'd still even send me "care packages" with stuff I miss back home every now and then haha (I live overseas now). Of course when the time comes they need help,me and my 3 sibs are there. 55yo dad retired last year (mom's been a housewife since the 80's) and I'm happy they're happy. BUT I get wh…	d5nj7cz	t3_4u23fw	t3_4u23fw
kimatz	Philippines	1476966895	34	Tagalog	English	Mas nakakabara daw ng radiator, sabi ng mekaniko namin. Baka kasi tap water ang hinahalo nila sa coolant or madumi radiator tapos saka nilagyan ng coolant (magbabara talaga). Personally bumibili ako ng 5 gallon na supermarket brand distilled water at yun ang hinahaluan ko ng coolant para kay Tagpi.	d9077e5	t3_58gh7t	t3_58gh7t
tudeldo	Philippines	1546507297	44	Tagalog	English	Agree. Lack of computer literacy should not hinder us from going forward. Pwede naman maglagay ng mga gaya ng sabi mo na online hubs or kahit tabs lang okay na eh basta makafill up lang ng online form. Kahit walk-in kaya na nila icater this way (nagpaparinig po ako sa lintyak na DFA).	ed51by7	t3_ac3717	t1_ed50dwo
zhern01234	Philippines	1466946198	48	Tagalog	English	Yo wtf I think I'm starting to fall in love with the pinsan of the girl that I'm courting. Ang saya niya kasi kasama even tho hindi siya ganun kagandahan.	d4ok9iz	t3_4px4o0	t3_4px4o0
upbotante	Philippines	1511520564	14	Tagalog	English	My dad used to work for Cong. Arthur, staff. Mabait daw si Cong, pero 'yung dad ni Rida, minsan daw, sinigaw-sigawan sila tapos sinabing mga patay-gutom at palamunin. Wala na doon si Papa pero sobrang tandang-tanda niya pa rin hanggang ngayon 'yung mga sinabi na 'yun sa kanya. World record holder for Tanglawan Festival. Hindi ko talaga magets kung bakit tuwang-tuwa mga San Josenos doon, e di ba p…	dq9t543	t3_7f3wdy	t3_7f3wdy
sstphnn	Philippines	1540081760	45	Tagalog	English	May secret files yung law school namin so basically it revolves around our community lang. May sunod sunod na post about this guy na super creepy daw and manyakis, ang hilig daw mang picture ng pwet ng babae. Last night I learned who that person was and boy saraps sa feeling kasi I legit hate that dude. No wonder walang babae nagkakagusto sa kanya sa school. Sobrang neckbeard niya sa facebook "wa…	e85dr6h	t3_9py624	t3_9py624
appleMakati	Philippines	1450773525	32	English	Tagalog	I'm no Binay fan. But do you honestly believe Roxas, Poe, or Duterte can beat him? He's doing his campaign silently underground. Penetrating the voters at the Barangay levels by promising regular employment statuses to all the Barangay officials and employees. Using the sister-city program to reach out to them. And promising to increase the IRA share of each local government. This while Roxas is …	cy7liww	t3_3xsdje	t3_3xsdje
unfinishedbusines-	Philippines	1486904772	29	English	Tagalog	Hahaha. Omg. Just like one of the bosses in our office. A simple lunch out with friends turned into a bit of drama when I didn't invite this boss. *Eh hindi po kita friend, boss, bakit kita aayain.* This boss is ignoring me right now. Well, di ko naman siya boss so go lang po. Can this boss influence the other bosses for matters that concern you? If not, tawa ka na lang. Di naman kasi natin mapig…	ddnbdis	t3_5tknzl	t1_ddnafc6
paulyarcia	Philippines	1529501571	49	Tagalog	English	I still prefer yung traditional setup. Less chance of error and malfunction. Hindi ko rin makita yung magiging big impact ng ganoon sa daily use ko ng phone, except awe factor.	e0zk8mf	t3_8sh29p	t1_e0zbzd7
arcloud	Philippines	1510281465	41	English	Tagalog	Huhu gusto ko bumili ng hard drive sa Lazada sale, pero mas trusted ko pa rin yata bumili sa stores for now. Me wants kahit 1TB lang. [Unrelated question] Which is more practical to upgrade first? A 5-year old laptop, or a 1.5-year old midrange smartphone no longer supported by its manufacturer? :))	dplqb3t	t3_7bwnm0	t3_7bwnm0
soybeansyap	Philippines	1448031384	43	Tagalog	English	I had an adolescent patient come in to the er coz of abdominal pain. Anlaki ng tyan, todo deny sya na buntis sya, busog lang daw. Kahit nung nanganak na sya, di nya daw alam pano nangyari yun. I told her dapat ipangalan nya sa anak nya jesus.	cx6wzr5	t3_3tjtw3	t1_cx6s6vf
ihateparties669	Philippines	1531052915	47	Tagalog	English	Marinate mo sya for two-three hrs pero mas maganda kung overnight para tumalab lalo ung lasa. Tas kapag iihaw mo na, wag mo itapon ung ginamit mo pang marinate, i-smother mo sya sa meat habang iniihaw	e1zzrag	t3_8x0ux5	t1_e1zzli2
mabulaklak	Philippines	1529992757	43	Tagalog	English	How do you prevent flu? Bigla akong inubo at sinipon this lunch after matrigger ung allergy ko. Napatay na ng antihistamine ung allergy pero may sipon at ubo na ako ngayon. Wala nang paracetamol sa office at umuulan sa labas di makakabili. Inom nalang ng tubig huhuhu	e1b0ovj	t3_8twx4s	t3_8twx4s
epal_much	Philippines	1517882405	40	English	Tagalog	Agree! Totga yun pag nagmamahalan kayo, agree kayo na gusto nyo nang pakasalan isa't-isa pero may hadlang tapos life took over na. Either sickness, location, family members, age, work, etc. May term naman tayo pag di ka mahal ng mahal mo: unrequited love	dtsvmuu	t3_7vicrs	t1_dtsskoh
surpanakha	Philippines	1539162842	43	English	Tagalog	I went to Pune 11 years ago, when I was 16, for a Science conference. The conference involved delegates from all over India + Southeast Asia, sobrang dami namin. Hindi kami informed na may cultural performance night pala. Yung mga Indian tsaka yung mga Malaysian, etc. sobrang handa may mga baon na costume, kami waley. Eh nagkataon I had Papaya song ng Game Ka Na Ba? saved sa motorola ko noon for …	e7i4tjk	t3_9mmt6r	t3_9mmt6r
chizero	Philippines	1510902331	29	English	Tagalog	Yes. I was reprimanded by a shit HR for not putting a photo and not bringing any spare. "Hindi mo alam?! Bakit di ka naglagay? Kasi dapat naglagay ka ng picture. Bakit di mo alam. " Kulang nalang tawagan akong tanga. In the Philippines daw, or Asia in general, required daw. Usually mga traditional shit companies nagrerequire niyan. My advice is, pag job interview (magdala ng resume) na, maglagay …	dpy6yj1	t3_7dih98	t3_7dih98
scarethekids	Philippines	1518427267	22	Tagalog	English	I know. I've met some cool and nice people from there. Toxic na toxic na sila but they have to finish their internship. Sayang, skills wise pwede na sila ipantapat sa mga private expensive hospitals. Lahat naman ng public hospital deteriorating na. Ilang eleksyon na nakalipas wala man lang napaayos. It will be expensive to renovate pero sana naman harapin din nila. We pay taxes naman e. Ewan. Bas…	du4cpet	t3_7wy3pa	t1_du4cl3q
AncientCaptcha	Philippines	1491703748	45	English	Tagalog	Thanks for your point po pero yung tanong ko eh paano mo ginawa na iba yung indention ng paragraph/bullet na yun. I'm sorry if this caused a misunderstanding	dg0oyyv	t3_646a87	t1_dg0neuo
wowowilson	Philippines	1504145997	46	Tagalog	English	Sa lahat ng dokumentong ipapasa mo, dapat lagi ka may kopya. Sa lahat ng gagawin mo na hindi ayon sa SOP, dapat may written permission na pirmado. x2 copies Yes, bulky sya, but it might just save your ass one day	dmcx7mf	t3_6x2k93	t1_dmcsr9n
halelangit	Philippines	1519795598	44	Tagalog	English	Mga around 23-24 po. Di ko na maalala yung iba, pero na recall ko din bigla that time yung mga past mistakes ko. Natakot din ako na baka balikan ako ng mga mistakes na yun, no matter what I did good, I'll be remembered by my mistakes, especially sa trabaho.	duy484j	t3_80t169	t1_duy43yl
MysteriousRobyn	Philippines	1527212332	28	Tagalog	English	kaya nga eh...lahat naman may standards sa looks but not all people looks lang ang hanap...may mga tinitignan din kami beyond looks...pero may friend ako...shiniship ako sa magandang mutual friend, ayoko kasi ndi ko type yung personality niya...makasarcasm wagas...sarap kotongan, tsaka sabi ndi porket maganda yung tao...ay auto crush na...:/	dzjam0z	t3_8lwjct	t1_dzj77zy
Jikkir_Skix	Philippines	1473029309	37	English	Tagalog	Some of my relatives are really judgemental and it pisses me off. Story: May ka-MU ang younger sis ko and nag post sya ng picture nila nung guy. Sa totoo lang, di talaga gwapo yung guy pero mga relatives ko comment ng comment na ang panget ng guy in a subtle way na parang may smirk and humiliation habang binabasa mo. Tapos meron pa yung tito ko na leader ng swat (idk where) sinabihan pa na addict…	d79m5z3	t3_5167sh	t3_5167sh
razemate	Philippines	1475275790	29	Tagalog	English	Naubusan ng LPG kaya nagtext kay suking tindahan para magpadala ng bago Tibo yun bago nilang helper at nagulat ako na siya ang nagdeliver nun LPG i felt awkward seeing her having difficulty lifting the LPG tank into our kitchen kaya sabi ko, ako na ako na at mabigat yan Pero tinabla ako at pagalit na sumagot na, ako na kuya kaya ko ito	d88x6vm	t3_55aas0	t3_55aas0
Fulltergeist	Philippines	1548036405	48	Tagalog	English	Tangina naman kasing wag mong sanayang ang pesteng sarili mo na pukinginang laging nagmumura. Seriously, alternating swear words with other words is just the same. Just try to avoid swearing at all, masasanay ka din.	eel6jty	t3_ai2ufb	t1_eel2m0r
PTR95	Philippines	1464428200	42	English	Tagalog	The LP's machinery devoted way too much time and resources on tearing this guy down they forgot to tell everyone how great the economy has become under their watch kaya tingin ng marami sa kanila ngangang palpak. Pati si Duterte hindi rin nila nakitang paparating kaya nasulotan sila.	d3mt7xl	t3_4ldx95	t3_4ldx95
makaelthos	Philippines	1481356693	30	Tagalog	English	Tip lang - Wag ka masyado maglaro sa weekends. Kung maglalaro ka, sa gabe talaga ideal(mga 10pm). Lam ko tunog palusot toh, pero sa gabi hindi masyado maraming bata naglalaro. Konti na rin nagcocompshop. (Pede rin laro ka pero party, lalo na mukhang ayaw mo masyado maapektuhan mmr mo) Ganyan ginawa ko, nakaahon ako from 3.5k to 4.3k. Di ko sure kung effective din toh sa 2k, pero try mo lang. Seco…	db0leaz	t3_5hglb0	t1_db0kq23
LayZboY23	Philippines	1530581536	32	English	Tagalog	Nope, dahil ba ito sa Gilas? Wala ito pinagkaiba sa mga gulo ng football hooligans. Yes, it is embarrassing for our Filipino Team and those that supported their actions but not as a whole race. There are lots of thing to be "proud" of being filipino and its culture while basketball is just a small part of it.	e1oyxml	t3_8vmnag	t1_e1oya7h
epal_much	Philippines	1510714121	29	English	Tagalog	Say you're busy. Pag nag-start magtampo, sabihin mo, problema nya Lang naman kasi pag-uusapan nyo. Make it pabiro.. if good friends kayo you can pull it off. If magtampo pa rin, sabihin mo tampururot sya. Pagtawanan mo lang ng pagtawanan, either sya na mismo lalayo or matututo syang maging considerate na friend	dpu7gss	t3_7cz5il	t1_dpu6gc9
stormysteelgreyeyes	Philippines	1503403190	30	English	Tagalog	Nakakalungkot makarinig ng ganito. Truly nothing lasts forevah... kahit supposedly true love. Good, you dodged a bullet right there. Nothing to do but move oooooooon and oooon and oooon it spins, crushing those on the ground. We're not here to stop the wheel. I'm going to break the wheel.	dlyprid	t3_6v9ym7	t1_dlypk33
spiralmeatloaf	Philippines	1512479047	30	Tagalog	English	4th year college na ako and nakaaparment nako dito sa Manila since first year. 1. Maraming coffee shops sa Manila, pero personally, the best for me is Bos Coffee, sa SM Manila ako lagi. Tahimik dun, price is okay, and mabilis ang wifi. 2. Sa pag titipid, di ako masyadong magaling dyan pero makakaipon ka if mag grogrocery ka na ng 1 month worth of food, siguro 2000 pwede na yun kung umuuwi ka nama…	dqsqo66	t3_7hp6w5	t3_7hp6w5
kkkkmmmm1028	Philippines	1524700293	44	Tagalog	English	So my officemate did the some revenge dun sa pagnanakaw ng pagkain nya ng roomate nya. May iniwan daw kasi syang half sub kagabi galing subway para breakfast kanina tapos wala na kanina paggising. He spoiled major details ng Avengers IW.	dxz1g98	t3_8exh5i	t3_8exh5i
Vakovich	Philippines	1537344618	17	Tagalog	English	r/mildlyinteresting ? &amp;#x200B; A few things I've noticed with the Japanese expats that are assigned in our company: * Sabay-sabay sila lagi mag-lunch (at hindi rin sila nagdadala ng baon) * Kahit kumakain sila na magkasama, bihira talaga sila mag-usap. Lunch lang talaga purpose nila sa canteen * Aalis din yung isa kaagad kapag tapos na siyang kumain. Walang hesitation kahit hindi pa tapos mga…	e68t3a8	t3_9h1vci	t3_9h1vci
abcGG	Philippines	1501679717	47	Tagalog	English	Just wait for them to start selling the unit only. Sabi ng isang big gaming establishment, yung distributor daw talaga ang nagset ng mga bundles na ito (the same when NSW was released).	dl2400u	t3_6r2hoj	t1_dl23931
iced_kape	Philippines	1488547736	49	Tagalog	English	Hindi naman kasi sinersoyo ng mga US ung WBC e. Hindi katulad sa World Cup (football) na proud mga players to represent their country. Mas maganda sana kung lahat ng best players maglalaro talaga, hindi ung hindi maglalaro ung iba kasi priority ung MLB.	deggwhf	t3_5x69kw	t1_deggtbr
426763	Philippines	1496493351	47	Tagalog	English	Yung plano ko sana is shit I need for the computer I'm going to build. Kaso, wala pang available yung model na gusto ko na keyboard. Tapos na enganyo ako sa mga sapatos sa Instagram tapos yung alam ko din na store na nagbebenta ng sapatos, wala din yung model na gusto ko.	diejp2u	t3_6f0fp2	t1_diejior
janerdelle	Philippines	1468727991	25	Tagalog	English	wala masyado pag small fish kasi utusan lang sila trabaho lang ng trabaho para sa pera pero wala pakielam sa nangyayari around the micro and macro environment hindi nila kilala mga connection sa cartel at mga protector pero pag yung mismo drug lord dami makukuha diyan like sino mga courier mga territory mga police or military na involved mga competitor alam talaga yung mismong industry kaya mas m…	d5fafnr	t3_4t719a	t1_d5f9i81
ketlourd	Philippines	1486814955	18	English	Tagalog	Macho culture, gold diggers, tempting kasi bawal at wala kang kawala sa asawa mo etc etc. Two of my friends' family have "anak sa labas" due to past affairs. My bestfriend's uncle is a priest who has 3 children but only one is acknowledged. He hides abroad na daw or some shit. I was shocked to learn na yung isa kong classmate nung HS ay anak sa kabit kasi 3 silang magkakapatid at laging nag po po…	ddlzljf	t3_5tda7a	t1_ddly5uw
kitiikit	Philippines	1543494417	46	Tagalog	English	This is me. I moved in canada 7years ago. Now i don't see myself living there anymore. Kahit may pamilya pa ako dyan. Umuuwi nalang para mag bakasyon. Once na mapunta ka ng ibang bansa at nakaranas ng mas magandang buhay, hndi mo na gugustuhing bumalik pa ng pinas	eapm8z4	t3_a1drs1	t1_eaozr7s
Rothgim	Philippines	1534435832	45	Tagalog	English	From what Iג€™ve read, itג€™s more of yun yung dadaanan na lugar. Parang sort of bike ride-around the world yung sa kanya. RIP sa guy, pero malamang naman may iba pang daan besides dun. I think dalawa sila.	e4asgcu	t3_97srsq	t1_e4aorg8
SinMichael	Philippines	1538827658	33	English	Tagalog	Hindi ko talaga ma-dig music ngayon like mga music from IV of Spades, Unique, Ben &amp; Ben, December Avenue and mga foreign music from The Chainsmokers, LANY, twenty one pilots and yung mga rappers ngayon, basta lahat sila. Still stuck with the music from the 80ג€™s, 90ג€™s, 00ג€™s. Pero yung mga people na ka-age ko ganun mga tugtugan nila. Tingin ko okay naman sila, not just my cup of tea.	e79paul	t3_9lutc4	t3_9lutc4
maximinozapata	Philippines	1549859244	38	English	Tagalog	Yeah, that's pretty much it. Tapos kung private talaga, dapat walang nakasabit na signboard kung PUJ ang inarkila (otherwise, pwedeng masita ng "out of line"). An example are the Muntinlupa-Laguna jeeps (via SLEX), and the Monumento-Bulacan jeeps (via NLEX). They have windows, and most importantly, doors (well, most of them anyway).	eg7c00i	t3_ap1c6m	t1_eg5eewp
xyxyyxyx	Philippines	1546732979	30	English	Tagalog	Yun kasing gusto ko parang grounded ata ng parents na ADD na makisalamuha sa aming mga J-culture enthusiasts. Iniintindi ko na lang pero lampake sa mga mensahe ko. There are even some moments na parang Yung mga kaanib nila na nagcocomment on an otherwise harmless J-culture related post ginagawan ng issue. They have to peddle the being saved trope to get more members. Who doesn't want to be saved …	edc9j9f	t3_acyrpc	t1_edc8ykz
Aeronautique_E	Philippines	1499922097	23	English	Tagalog	Uy nakuha mo na kotse mo? נ˜† I'm standing by to the answers to this. I want a dashcam too. נ˜† As to car care, wax protects your car exterior. A gentle wash of mild soap and water does the trick. Remember to thoroughly rinse your car so that soap will not accumulate in the gaps. Maganda ang Meguiar's, Turtle Wax at ArmorAll na waxes (I personally use ArmorAll Total Shield). Change your oil rel…	dk5kc5o	t3_6mz7b6	t1_dk5jzyz
kozo	Philippines	1450093682	34	Tagalog	English	Dapat di na lang pinatulan ni digong si mar, binigyan pa tuloy ng mileage. But looking back, if mar will indeed will have all the proof that he graduated in wharton the duterte camp can spin it as "wharton grad ka pala eh kaya pala di mo alam ang kalagayan ng pinoy" or something. This is politics. Kahit sabihin ng iba eh kala ko ba iba si duterte, define iba? Eh di naman ata nya sinabing di siya …	cxyki7o	t3_3wrv3i	t3_3wrv3i
BillyLeGoat	Philippines	1502750459	35	English	Tagalog	&gt;In a privilege speech, Sotto called UN special rapporteurs Agnes Callamard, Michel Forst, Maud de Boer-Buquicchio ג€helicopter expertsג€ for offering solution to the problems of the country that ג€they are not even familiar with.ג€ Callamard is the UNג€™s special rapporteur on extrajudicial, summary or arbitrary executions, while Michel Forst on the situation of human rights defenders and…	dlmlauy	t3_6tpiny	t3_6tpiny
coobchips	Philippines	1502787307	44	Tagalog	English	Pagbantaan na yan agad para ibalik na! I saw something on Facebook, yung hindi binabayaran utang tapos kapag sinisingil galit pa. Tapos nainis na siya, sinabihan niya nang: "Kapag di mo pa ako binayaran, susuntukin na kita sa mukha!" ayun nagbayad the day after. Haha	dln96j9	t3_6trtk7	t1_dln90ow
fernandopoejr	Philippines	1535931182	48	English	Tagalog	Gayahin mo ang mantra naming mga lalake pag may nagtanong "deny, deny, deny." Walang magagawa ang mga tao para iconfirm yab, kamanyakan at creepiness na nila yun if they insist or investigate.	e5aiw99	t3_9cck6p	t1_e59nqpi
[deleted]	Philippines	1416356797	49	Tagalog	English	jaysusfuckin'christ. these politicians waving around *pesona non grata* like it were a valid exercise of local municipal power. guys guys guys. ang *persona non grata* ay ginagamit lamang ng isang host state upang iparating sa ibang bansa na ang isang diplomat ng bansang yaon ay bad boy, at sadyang kinakailangan ng palitan. it is a principle of law with use only as to states and their foreign dip…	cm6hxkf	t3_2mpifh	t3_2mpifh
winjn	Philippines	1516713815	44	Tagalog	English	Most of the time alone lang, irreg students kasi kami ng barkada so hindi nagtatama yung sched namin this sem tho we hang out naman kapag walang classes	dt41ewk	t3_7sdqyb	t1_dt41amj
tinigang-na-baboy	Philippines	1520070570	47	English	Tagalog	Watched this a few times and makikita mo talaga agad kung sino yung mga veteran na sa field. They always kept their composure. Yung mga mejo baguhan pa mapapansin mo nara-rattle until Jessica eventually helps them out.	dv45h05	t3_81lr5y	t1_dv3ts4b
kiko0311	Philippines	1540970530	41	Tagalog	English	dito andaming naiirita sa management dahil kung kelan wala ng pasok bukas saka andaming pinapagawa at tinatanong kung pwede daw ba pumasok bukas (in the nicest way possible) which sounds in the most insincere way. Naturingan na last week di daw maasikaso dahil sa upcoming halloween party. smh	e8rytya	t3_9svd2r	t1_e8ry049
pilisiti	Philippines	1493808486	44	Tagalog	English	Some thoughts about work emails: 1. Stressed ako pag daming naka-CC. Lalo pag mga tipong VPs kasali sa convo tapos ako lang yung nakakaalam ng sagot. 2. Stressed din ako pag iba-ibang tao ang sasagutin sa iisang email. Paano ba pinakaorganized na pagreply sa ganito? 3. Laging 'Hi X' per email kahit sobrang haba na ng thread at dalawa lang kami sa convo. Do you have work email management hacks you…	dh2im25	t3_68ze3u	t3_68ze3u
lostingrace	Philippines	1545384366	48	Tagalog	English	Hahahah Ganda mo kaya girl! Idk I find/appreciate beauty more pag mukhang pinay rather than half-half. I mean, nothing against them, theyג€™re pretty Pero feeling ko Lang mas magaganda yung mga mukhang pinay talaga. Idk how to explain hahaha	ec8ohnw	t3_a862rk	t1_ec8ocym
pawedbear	Philippines	1500501836	46	Tagalog	English	I was groped in a van too. I was too scared to talk, baka may kasabwat siya at baliktarin ako. Natatakot din ako na pagkababa ko e sundan ako nung lalake. Ang laki pa naman ng katawan niya, college girl lang ako nun, kayang kaya niya ko maoverpower.	dkg65un	t3_6o9duh	t1_dkfo6lo
podboi	Philippines	1480842578	35	English	Tagalog	You can't hold your liquor OP, I used to drink after classes back in college kahit may pasok the next day, learn to say NO, la naman problema mag labas ng stress dapat lang alam mo kung kailan tumigil kahit anong pilit sayo at peer pressure ang ibato sayo, rule number 1 yan sa pag-inom.	darngg2	t3_5gbzhd	t1_darhexn
tartaddict	Philippines	1523609867	45	English	Tagalog	Youג€™re right about those things. But in this case, this is delivery. Iniisip ko baka di lang ג€USBג€ pinapadala kaya nagpapadoble. Pero pwede rin namang pinadoble niya talaga.	dxah0ba	t3_8bvwui	t1_dxagbwi
DitoNgayon2	Philippines	1542976406	14	Tagalog	English	Mahirap talaga maninidigan para sa prinsipyo. Kaya mga may mga bayani e. Para ano pa yong linya ng ating Pambansang Awit na 'ang mamatay ng dahil sa iyo.'? Ang option ni Lorenzana, resign gaya ng isang pulis na ayaw makisalo sa EJK. Kung sino man ang papalit sa kanya, ipapakita lang na sila ay sugapa sa kapangyarihan hanggang sa pagtataksil sa bayan. Kung sakaling bumitiw si Lorenzana, maaari siy…	eaan474	t3_9zlv73	t1_eaamhz3
heyydee	Philippines	1541954043	45	Tagalog	English	I'm currently on that awkward phase and thinking of letting it grow back. Ang mahal kasi ng gupit dito! Huhuhu. Pero I definitely love my short hair! Kung affordable lang talaga ang haircut, every 2 months ako magpapagupit!	e9hlyz2	t3_9w2nvf	t1_e9hli3x
sakundes	Philippines	1531740751	25	English	Tagalog	Mahirap yang rey mysterio moobs lol, ang takedown teknik na tinuro ko eh yung rush duck leg grab + pull, then ground and pound Pag kaming dalawa nagagawa nya eh, pero never nya ginamit IRL lol Part of me is excited na mapatawag sa school if he finally decides to execute some moves, another part is very afraid of Le Wife. Parang nararamdaman ko na nga mga sermon na dadating from my mom and the wif…	e2h50s3	t3_8z9mhp	t1_e2h49dz
noneym86	Philippines	1532691443	45	English	Tagalog	San nyo nakukuha yang ganyang data? Sinubukan ko iGoogle or tignan sa DBM wala ako makita eh. Pashare naman ng source please (yung hindi rappler sana kasi wala rin sila source kundi rappler articles). May gusto lang sana ko tignan. Thanks po..	e34gxi6	t3_92b7e2	t3_92b7e2
JustPassingBy09	Philippines	1540178505	33	Tagalog	English	I haven't realized that. It doesnt feel right kasi maki sama sa "bonding moments nila" they waste a lot of office time kasi. In one day, they spend almost 3 hours every day for meals and snacks sa canteen. Paid lunch kami kaya mejo uma abuso ung mga tao. If makikisama ako sa trip nila, sira wallet ko sa shopee, lazada and useless stuff. Di naman ako mayaman para ma afford ung luxury na yan. Ayaw …	e87sz9e	t3_9q7k6b	t1_e87rm8u
moshirotama	Philippines	1489469411	39	Tagalog	English	3 days clear - 4th day pinabaunan kami ng ulan, it's a collection of all the mountains i hiked. totoo na isa sya sa pinaka mahirap na akyatin dito sa pinas - kung aakyat ka, need some inputs, you can pm me :)	dewk5c5	t3_5z9hfx	t1_dewjzvp
pressured_at_19	Philippines	1446029578	45	Tagalog	English	the most heartbreaking loss of my life was when nadali ako ng ipit gang sa bus and nakuha yung punong puno ko na 30GB ipod video. May connect kaya na "Dead on Arrival" by Fall Out Boy yung tumutugtog nung nangyari yun?	cwfqcv4	t3_3qjhn6	t1_cwfprmy
popoy12345	Philippines	1447507329	46	Tagalog	English	Magnonotify sa mga friends mo nakalagay na safe ka from paris attack. May friend ako sa fb nakalagay safe daw siya from paris attack eh tarantado nasa marikina lang naman siya.	cwzw5w5	t3_3srm34	t1_cwzvi5a
therealkajime	Philippines	1486648911	45	English	Tagalog	Hindi naman reklamo to. Isa pa, hindi lang naman ito issue na madaling pagdesisyunan. At hindi lang naman babae ang nasa posisyon para sa assurance. That's what I need, too. After all, she left and replaced me in the first place. Kaya ako nagdadalawang isip dahil baka maulit muli.	ddj3b1u	t3_5sz4oi	t1_ddj33cx
goingcc	Philippines	1512973628	40	Tagalog	English	I had that prof before, wala akong system unit nun since subject namin hardware maintenance.. halos 3/4 pala ng klase walang system unit, so ang ginawa namin nanghiram kami sa mga kakilala, o kaya salit salitan kami ng gamit dun sa system unit.. para paraan lang talaga pag dating sa pup	dr2qfo0	t3_7iyiik	t3_7iyiik
The-Provost	Philippines	1545973869	48	English	Tagalog	Ang diskarte ay nangyayari lamang sa mga sitwasyong mataas ang stress level, simply like fight or flight response. So expose yourself outside your comfort zone!	ecpk706	t3_aa6o4x	t1_ecpk0gg
mafocker	Philippines	1457140195	46	English	Tagalog	Nahuli kaming nag cutting ng classmate ko nung thursday and hinde ako pumasok kahapon, sa monday na kami kakausapin ng guidance counselor. Any advice from past experiences?	d0o202s	t3_48zj4a	t3_48zj4a
paulyarcia	Philippines	1522406221	24	English	Tagalog	Pag pasensyahan mo na brad. Ironically, sa mga guidance counsellor na nakakausap at nakasalamuha ko, sila ang pinaka judgmental at unwelcoming na tao. As for your experience, I'm sorry na nangyari sayo 'yan. Up until now, for some, sa babae lang pwede mangyari ang harassment and abuse. Pero kapag lalaki, katawa-tawa. Nevertheless, hindi dapat nangyari sa kahit na kanino ang naranasan mo.	dwivdxn	t3_88857u	t1_dwish8z
jazzdonuts	Philippines	1528182112	39	Tagalog	English	tangina. first day of school ko today. no sleep kagabi. not because i was nervous to go school, but because di mo ko makalimutan yung nang-iwan saking online friend/ewan ko ba kung ano kami putangina. iiwan mo nalang ako wala pang explanation?	e04z9w6	t3_8onro9	t3_8onro9
Cherry2490	Philippines	1498755734	32	English	Tagalog	Better siguro kung mag focus sa improvement ng public transpo para ma discourage ang pag oown ng private car. Mind you, I know a lot of people that would have chosen public transpo (makakatulog na sa byahe, makakatipid pa) over private vehicle ownership pero sobrang pangit ng public transpo dito. Mahirap pa daw yung byahe kesa trabaho nila. Hehehe.	djkc412	t3_6k7avn	t1_djkb51p
wanderpotato	Philippines	1522985924	49	Tagalog	English	depende sa audience. my friends and colleagues often joke about death and "ganito simula ng horror film.." kapag nag-a-outing. heck, tinawanan nga lang namin nung muntik na kami bungguin nung nag-overtake na bus eh.	dww7t4v	t3_8a6364	t3_8a6364
ProllyanAlt	Philippines	1517067831	42	English	Tagalog	Parang medyo ok pa nga iyon kasi aware yung nag swipe na married na kaso eto iba eh, yung description niya pang-binata and open to meeting up. Also, there's a tell tale sign that this is recent, like in the past year lang.	dtbn1t7	t3_7tbv92	t1_dtbmhvy
buwantukin	Philippines	1549096796	46	Tagalog	English	GIRL TRUEEEE yun nga e i clocked the pubmat din kaya akala ko talaga sa nectar. I'D LOVE IT IF SHE HAD HER SHOW AT NECTAR!!!! gusto ko sya makita magpa-split split keme don UGHHHH ~~just seeing her doing the splits in my head makes my basement flood~~ TAPOS SANA HINDI LANG ISANG GABI UGHHHHH SCHETTE MY HEART	efkxvzz	t3_amah04	t1_efkxjll
TapaDonut	Philippines	1504167211	24	English	Tagalog	- Matulog ka ng maaga. Wag muna mag DOTA 2 or LoL. - Exams are Math, Science, Language, and Logical Reasoning - Some schools have more questions in math and some in science. Basically, aral aral diyan maigi. Basic lang naman eh, mostly algebra and geometry. Pero mostly algebra. Kung may access ka sa mga college algebra books the better - Science is my forte so I cannot guarantee the difficulty pe…	dmd8w3x	t3_6x3ytp	t3_6x3ytp
mitselschisels	Philippines	1502992567	41	English	Tagalog	Assign tasks as early as now kahit 'di ikaw 'yung leader. Track each other's progress using GDocs (task, assigned person(s), start date, end date, deadline as entries), nakakapressure din makita na may nagagawa groupmates. Unless, matibay mukha ng groupmate mo and wala talaga siya care. Haha. Take it from someone na umiyak gabi-gabi dahil sa groupmates niya sa plant design.	dlrf87p	t3_6uaw60	t1_dlre8kn
thatrandomkantodude	Philippines	1540942128	25	Tagalog	English	Haist. Ever get that feeling na nalukungkot kayo for your pet? Yung parang iniisip monna baka need nila ng better owner? Oks naman pet namin kasoooo feels ko baka ma sad siya or depress kasi kukang time para sa kanya? Wala na kasi kaming kasambahay so feeling ko, kapag naiiwan namin siya mag isa na sasad siya huhu. Buti dati layi siya may kasama ngayon solo flight na lang siya kapag umaalis kami …	e8r9zge	t3_9ssi91	t3_9ssi91
BossPeng	Philippines	1523491203	31	Tagalog	English	Pinagtataka ka ko. Search Warrant ang way na nahuli siya. Lumaki ako sa lugar ng drug infested area (somewhere in Taguig, alam na!) And usually sa mga small time user, eh buy-bust ang way ng pulis para mahuli ka. Ang usual na sineserve na Search Warrant eh yung mga bigtime. As in kilo-kilo na bato. Unusual yung Search Warrant para sa isang small time user. Suspetsa ko, may naiinggit sa kanyang ta…	dx7qw8k	t3_8bkzkp	t1_dx7pvm1
enero_jones	Philippines	1493216241	34	English	Tagalog	Di ko naisip to ah. Siguro dahil ang irregular ng period ko haha. Pero nung may naging roommate akong girl (na friend ko na before ako mag-move in) at boy (na friend nya), di naman naging issue ang feminine hygiene. Ang naging issue ay yung hygiene ni kuya. Isang araw, may nangangamoy na bangkay ng ibon sa luggage nya lol! Salamat ha! This is very useful advice.	dgrwx2k	t3_67n4n3	t1_dgrvx27
Schizio	Philippines	1477295236	23	English	Tagalog	&gt; Dinadamay pa yung mga bumoto kay Duterte. IMO, kung walang bumoto sa kanya, ibang issue siguro kinakaharap natin at kung iisipin mo, yung 16 million voters niya, wanted these things happening kasi these things were his selling points, drugs and china, he brought the flag, not just sa Spratlys, dinala niya hanggang Beijing. San ka pa? If people made their decision to vote for him without any …	d95bzve	t3_591xcs	t3_591xcs
gardenia_sunflower	Philippines	1549500305	31	Tagalog	English	Fam, late ko na ג€˜to nabasa! :O May prinescribe saג€™kin yung doc, pero hindi sya mefenamic. Nakainom naג€™ko kagabi, pero mga almost 5 hours naman na after nung vaccine. And yup, nakakatulong yung cold compress. Ngayon masakit uli yung braso ko, pero manageable pa naman di tulad kahapon na mas masakit. As needed lang naman yung pain reliever, sabi ni doc.	efwsz23	t3_anp82i	t1_efvgm0d
higzgridz	Philippines	1514869065	44	Tagalog	English	If ever na mag-move out ka, try ka ng iba't ibang scenario then tanong mo si kuya mo ng mga possible outcome and setting. With that, you can start on how to manage your mother. Sanay na kasi tayo sa culture na pagtanda ng mga anak at nagkatrabaho na eh anak na ang bubuhay sa kanila. For sure, if ever na natuloy na umalis ka na or kayo, may away and hinanakit pero minsan, di rin naman laging tama …	ds2g50d	t3_7njgqe	t3_7njgqe
danleene	Philippines	1534474130	32	Tagalog	English	Yup. I can attest. (raises hand) Yun nga lang, one does miss out on everything. So hanggang ngayon, super baba ng tolerance ko sa alcohol, karima-rimarim ang yosi para sa akin, at hindi ako marunong sumayaw. Kaso nag-iiba na ang set of mores na itinuturo sa INC, eh. Dati bawal kaming makinig sa mga 'musika ng sanlibutan', pero ngayon, Guns N Roses ang tutugtog sa Philippine Arena. Hahaha.	e4byzrl	t3_97ygfy	t3_97ygfy
spacedorito_	Philippines	1513877139	46	Tagalog	English	Kelan kaya mawawala yung *"Sana mamatay ka na/Ma-rape ka sana"* comments ng mga inutil na keyboard warriors sa facebook? Para kaseng walang nagpalaki sa kanilang magulang eh =_= Lagi nalang silang triggered^tang^ina	drktjul	t3_7l5t5t	t3_7l5t5t
potatoes828	Philippines	1490374173	41	Tagalog	English	Minsan kailangan lang natin tingnan paligid natin. Minsan nate-take for granted natin sila. Di natin maramdaman na attracted pala sila sa atin kasi we are so focused with the person we are attracted to.	dfcv245	t3_61814u	t1_dfcpp5n
Adrasteia18	Philippines	1511143502	49	English	Tagalog	karamihan ng mga artista natin, hindi citizen ng pilipinas. Yung iba nagstart at citizens, then use their artist visa to eventually get citizenship somewhere else.	dq2ljjk	t3_7e52pp	t3_7e52pp
moogeek	Philippines	1539772799	49	Tagalog	English	Uy hindi, ako lang siguro may personal konting pet peeve sa ganito (although sa rules ang alam ko bawal ang non-sarcastic jeje). Pero di naman kita pipigilan kung yan trip mo. Comment whatever you want my friend and welcome sa r/ph נ₪—	e7xe8ct	t3_9owwdh	t1_e7xdzqt
choco_wobble	Philippines	1547100368	42	Tagalog	English	Got flu as well around that month, I'm blaming for the much colder morning we have around that month and since hindi sanay ang pinoy na ganitong climate, lahat nagkakasakit. Mas lumala lang nun umuulan pa until the end of December. While I wait for my annual flu shot, for now, I have to wear face mask for my daily commute especially AC tranpo types kasi umiikot sa sasakyan, can't wear on a jeep k…	edoz1kr	t3_ae8vri	t3_ae8vri
sourlemon75	Philippines	1544070727	32	English	Tagalog	You keep on nitpicking where those figures came from but you do not see the whole point of the argument. O i-spoon feed pa ba sayo na sinabi na ngang may aalis na mga kumpanya sakaling ituloy yang phase 2 ng TRAIN and this may adversely affect the economy at mga taong mawawalan ng trabaho? &amp;#x200B; As they say, thinking logically (or thinking at all) isn't the strongest suit of a DDS.	eb6yx05	t3_a3am82	t1_eb59sjv
charleszarzadiaz	Philippines	1472363166	47	Tagalog	English	Hey man, that specs' good enough if you're just gonna use it for programming. Preferred brand? Hmmm... I've been using my Toshiba laptop since 2009. Sobrang tagal ng lifespan ng brand na 'to unlike 'yung sa ibang brands ngayon na parang disposable nalang.	d6zodm9	t3_4zwfjv	t1_d6zn3ko
inday_badiday	Philippines	1500982291	30	English	Tagalog	Forever alone problems.. Front desk: May I help you? Me: I booked a double room with queen/double sized bed. But I got twin beds instead. Can I switch to another room pls? Frontdesk: But your room fits two people. 1 person each bed. We have no other room available. Me: But there's only me.. Frontdesk: U want single room? We have single room with single bed..good for singles. Me: *hahahuhu gusto k…	dkovqhy	t3_6pf54n	t3_6pf54n
TatakNJS	Philippines	1542033877	45	English	Tagalog	Labo ko sobra. Gusto ko lumabas pero tinatamad ako pag hindi ko nasusulit yung paglabas ko. Pag matagal naman akong nasa labas, napapagastos ako e ayoko naman masyado gumastos. Kaya here I am, wasting my day off by contemplating until it's too late for me to go out.	e9jzeam	t3_9wcrgl	t3_9wcrgl
dcuz2	Philippines	1524091951	41	Tagalog	English	Anyone ever encounter the Zesto gang around edsa? Kunyari konduktor. Tapos pag halimbawa pag sinabi mo isa, kasi kala mo sya ang konduktor. Bibigyan ka ng Zesto na tinusok na nya ng straw. Mahal ang singil tapos kukuyugin ka pag hindi ka nagbayad.	dxlfl0a	t3_8d9s9p	t3_8d9s9p
jeyxi	Philippines	1493475281	45	Tagalog	English	No one from Asean leaders can raise it into discussion except Duterte himself dahil tayo yung directly involved. Kaso ayaw nga ng lolo mo. Wala na tayong magagawa dyan.	dgwpnw0	t3_688hug	t1_dgwm0j7
throwawaysonicmike	Philippines	1532949653	39	Tagalog	English	Windows 7 po, afaik meron din ganyan feature yung gamit ko eh "snap" ata yun. Naka disable kasi yung sa akin. Ang habol ko kasi sana yung kapag nag full screen gamit yung PS or playing any game, doon lang sa gilid naka full screen, then the rest kita ko pa rin yung screen, tendency kasi kapag nag full screen sinasakop yung buong monitor eh. Ang gusto ko mangyari doon lang sa gilid yung nagfu-full…	e3a8wat	t3_932rf2	t1_e3a8r41
wateber	Philippines	1412288177	41	Tagalog	English	i hope di umulan ng malakas ulit ngayon. two days na kong hirap umuwi tapos konti lang ang tulog kasi maaga pa ang pasok but the good thing is FRIDAY na! anong balak nyong gawin this weekend? good morning!	ckytf6d	t3_2i4rbm	t3_2i4rbm
mitselschisels	Philippines	1509589153	49	Tagalog	English	Hahaha. I can't remember exactly 'yung name ng multo pero meron din sa amin na kwento na ganyan. Sumusunod sa elevator and all that shit. May time na mag-isa lang team namin sa buong floor and may naririnig kami na nagtatype sa walang tao na part. Lol idk.	dp7z2yi	t3_7a6wpj	t1_dp7yxhm
Illsteir	Philippines	1521443435	46	English	Tagalog	Try JMN Hobby sa Fisher Mall or Harrison Plaza. Hobbiworkz yung brand ng compressor nila. Or, pwedeng sa Hobbiworkz ka mismo mag order kaso yung manggagaling pa sa Cebu yung item. May airbrush and airbrush accessories din sila, kaso mas mahal compared sa Zee Hobby. Sa Lil's Hobby Store sa Megamall or Glorietta may tindang Tamiya Brand airbrush and compressors. May kamahalan nga lang.	dvxi6nx	t3_85gpou	t1_dvxhywf
Mr_Connie_Lingus69	Philippines	1473469229	24	Tagalog	English	hahahaha! cute cute, kakamiss naman tuloy yung ganyang stage hehehe. for sure di mo lang alam sumisimple ng cheap shot na yan sayo pero it's ok part yun kasama yun hehehe :D nice pagpatuloy mo lang yan pero keep your guards up din ah. hehe enjoy ateyyy! Regarding dun sa Office romance, wala naman ako nakikitang masama as long as you keep professional paren naman hehehe. ang mahirap nyan kapag hal…	d7gf8e7	t3_51wm9a	t1_d7gee10
tell-a-phone	Philippines	1512772292	42	Tagalog	English	Children don't ask to be born, so yung mga nagpapamukha na "pinalamon kita, magkaroon ka ng utang na loob" are bunch of f*ckers. Part and parcel ng parenting ang financial responsibility sa mga anak kasi pinili niyo magkaanak, pero yung mga anak ninyo hindi "part and parcel" ng pagiging anak ang maging "retirment fund" dahil wala naman sila say nung plinano nila na gawing retirement fund ang anak.	dqz0g8p	t3_7iburo	t1_dqxzkg0
devz159	Philippines	1537959137	49	Tagalog	English	puchang inang mga Landlord na mukhang peraaaaaaaa! may 1mo advance at 1 mo deposit ako ngayon nang-hihingi na naman ky pera kasi delayed daw ako? putcha hindi ako nadedelayed! I'd rather not eat than be delayed sa mga bills kooooo gaahhhhhhh! kakapagooooddddddd!	e6nw7pq	t3_9j13gf	t3_9j13gf
jejeview	Philippines	1493012328	32	English	Tagalog	Ah, most prolly FX 'to, no? I don't ride that, so kung Centris ako galing, I'd ride a bus/the MRT to Cubao and then ride a jeepney to Libis. I recently started coming in late for work (like mga 12 NN), so travel time is an hour lang. 9 na labas ko pag NN ako pumasok so wala nang traffic. Mga 45 minutes lang.	dgo8g46	t3_676t67	t1_dgo88in
raprap07	Philippines	1546332231	36	English	Tagalog	Makakapili ka ba anong variant ang kukunin mo? Anong mas maganda sa dalawa? Mas matibay? May napag tanungan ako na yung simcard daw don e parang specially for that purpose lang and 0966 yung number, pag sinalpak ko yon sa pocket wifi or phone gagana naman yung internet and magagamit ko yung promos?	ed03tbk	t3_ab7bo7	t1_ed02o13
AGstein	Philippines	1468936346	13	English	Tagalog	Dude... Adobo chronicles? Tapos kinombo mo pa nung Mocha Uson at GRP? Ang sakit nun. HAHAHA Pero seriously though, parang harsh masyado yun. Though hindi ko pa nakikita yung kung ano ba talaga yung buo nung sinabi mo, IMO, I think I can infer that it was too much of an unfair comparison. And I don't know about you but I think I can give TP credit as it is actually due sometimes, if not, most of t…	d5i4l0u	t3_4tjm47	t1_d5i38mt
i_ii_i__ii_i_ii_i	Philippines	1441809504	41	English	Tagalog	Ow shit, we are in the same boat. Commitment issues and the dream part. Last night I had a dream where my ex and I haven't broke up yet. Shit, nakakadurog ng puso nung nagising ako. Bumalik kasi yung pagka-miss ng may ka-hug tight ka tapos aamuyin at aamuyin mo talaga siya kasi ang bango niya. נ’”	cuvm1ny	t3_3k7ygs	t1_cuvgtkm
sendcordonbleu	Philippines	1498239944	42	Tagalog	English	Noooooo. Ako lang pwede mag-upvote kay most favorite mod of all time in the universe, /u/redkinoko. Haha joke lang chong. Pag may time ako, punta ako sa show mo. Gusto ko lang makakita ng mga legit stand-ups. See you, soon! נ˜	djb0wpp	t3_6j0m6z	t1_djalu8k
ben7go	Philippines	1469027095	49	English	Tagalog	Bakit pag nag ELI5 hindi naman pinapaliwanag ng pang limang taong bata talaga unlike dun sa ELI5 thread ng iba? Like the other day, this guy ELI5 what would happen if you land in Jupiter.	d5jm1rn	t3_4tqfav	t3_4tqfav
skymonger012	Philippines	1547543924	48	Tagalog	English	Ohhh haha super daming factors and need mo iconsider. madaming technicalities na mag ooverlap kaya dapat mag research talaga dahil mahirap mag kamali ng matindi dahil sobrang hirap makakuha ng pilot's license. Yes sir. Pilot po ako hehe	ee3ynda	t3_ag61if	t1_ee3yl6m
okomaticron	Philippines	1532600761	42	English	Tagalog	Hrmmm marami haha what scale are you planning to paint? Basically proper mixing ng thinner at paint, brush handling, at masking pinaka una mong aaralin. Try mo mga tanks o kaya lumang toy cars muna	e327jp7	t3_920vb8	t1_e3277jy
flamehorizon	Philippines	1454436269	34	English	Tagalog	i dunno kung meron pa sa 4th hs year ng CAT. as far as i can remember sa CAT namin merong 3x4 haircut rule for men. parang form of military training kasi yan on how well you can follow the rules and the concept ng chain of command. kaya kahit nung nagcollege ako, sumunod na lang ako at kasama yun sa pinirmahan ko nung nag enroll ako.	czl7wq9	t3_43tzoj	t3_43tzoj
eatmelikeacannibal	Philippines	1490622369	40	English	Tagalog	Hays minsan talaga ang tao mismo may problema eh and not the system. And wala din magawa yung mga matitinong taxi drivers kasi their reputations are tarnished by these other mapang-abusong drivers. The sad part is mas marami yung mga gagong drivers.	dfgthlx	t3_61qawn	t1_dfgs17c
LayTheBug	Philippines	1506359930	43	Tagalog	English	Parang mas na shookt pa sakin si ateng nung napakapit sya sa legs ko pagsakay nya ng jeep. Wat da hel. Almost 2 hours pa, makakapahinga na ulet. Letseng bungad ng Monday yan, strespul. Good night / good morning mga kyotipatuti.	dnhq296	t3_72dbzw	t3_72dbzw
itsmemod	Philippines	1516784715	41	Tagalog	English	Sometimes infidelity in marriage is not just through having an affair, infidelity din siguro yung inuuna mo atupagin yung relatives mo kesa sa asawa mo at sarili mong pamilya	dt5q6qy	t3_7skh3v	t1_dt5ov1h
iwanttobeastrongman	Philippines	1541366800	45	Tagalog	English	Dude, I know how to treat a lady with full respect and honor, tapos makakakita sya ng seaman ang course at ganon-ganon nalang :( like wtf I gave her everything.	e921xsd	t3_9u4dj9	t3_9u4dj9
kamandag	Philippines	1505610811	39	English	Tagalog	Ignorance of the law is not an excuse. Kung di naiintindihan ang isang bagay, alamin. Hindi bahala na. Siguro naman hindi aeta o parang tasaday at nakatira sa kweba ang kausap dito. Ang mga lumad ay matagal ng nangangalakal. Marunong nga po sila pumirma. Hindi po kailangan ng isang college degree para pumasok sa isang kasunduan. Kailangan po intindihin bago makipagkasundo. Meron ako kaklase na "v…	dn3uwf0	t3_70g7e5	t1_dn3tdpy
elutriation_cloud	Philippines	1523340840	41	English	Tagalog	As someone whos also recovering from depression, just prioritize your sanity first. Sure, you can spend all day thinking, trying to understand everything, and replying to toxic people pero practically, ano ba magagawa nun? Also, keep in mind na depression is sh#t. Hindi ka mauubusan ng reason para maging depressed: job, health, settling down, money etc... Okay, syempre opinions ko lang ito, baka …	dx44z77	t3_8b2ffh	t3_8b2ffh
stormysteelgreyeyes	Philippines	1507164137	42	Tagalog	English	Follow up question, noong pag all-nighters ako for study, iinom ako kape tapos aantukin, makakatulog, pero magiging after 1 or 2 hrs den okay na gising na, ganoon ba talaga yun? Pero bakit inaantok ako pag nagkakape?	dnx7js8	t3_74bixt	t1_dnx5fk3
DeltaAplha27	Philippines	1546614578	24	Tagalog	English	Nagtataka dati yung mga taga samar kasi may delivery ng super cars addressed to biringan city eh hindi naman yun known sa lugar namin. Also, sabi ng matatanda sobrang gaganda and guapo daw ng mga tao doon. Super nice ng lugar with high rise buildings and all. Engkanto sabi nga nila. Mostly mga matatanda sa samar and leyte naniniwala sa araw city. When we were kids lagi kaming pinapagalitan pg nag…	ed88227	t3_acfu9x	t3_acfu9x
Axehead	Philippines	1449881574	48	Tagalog	English	If anything, quarrels like this strengthen relationships. Don't be discouraged getting married just for this reason. Kapag matagal na kayo ng SO mo, tatawanan n'yo nalang ang mga alitan n'yo noon.	cxvzkat	t3_3wfmew	t1_cxvxt4l
bpnomad	Philippines	1531808031	48	English	Tagalog	sobrang mahal magtravel sa israel :( want to take my parents and grandparents there for a private holy land tour $700 per person guide pa lang. dfq. holy land tours usually take 10 days to cover everything. yung mga pinoyled naman na tour ($3k per person, no meals) sobrang paspasan di kaya ng matanda at mukhang di sulit. haha sorry OT. ito lang kinakastress ko ngayong araw na to. tumatanda na kas…	e2j0nb4	t3_8zesfj	t1_e2ikhqb
icaaamyvanwy	Philippines	1547465245	46	English	Tagalog	Pinagusapan namin to ng boyfriend ko. Pag nag grand gesture siya sisipain ko siya sa tuhod. Charot. I told him gusto ko kami lang, kung gusto niya may pictures magset up siya GoPro lol. Not that I wonג€™t say yes (SHEMPRE OO) itג€™s just that I want that moment between us lang. נ˜‹	ee1hymt	t3_afubx1	t1_ee1h9e1
Boypureza	Philippines	1532933842	49	English	Tagalog	Ginawa ko rin to dati e. Nagsisi ako after. Isang araw kong di nalabas. Sobrang sakit sa tiyan! Haha kaya kapag iinom ako nito, i'll make sure na yung hindi ko pa nalabas or not close to getting it out. Yung tipong masakit pa lang tiyan. Para sure.	e3a186e	t3_930u12	t1_e3a0ytt
Prongsky	Philippines	1492941696	26	English	Tagalog	Yung gamit ko yung kasama in the box nung Asus Padfone 2 ng lola ko pa. Nung bumili sya baging phone, hiningi ko kasama ung earphones. Great sound and bass. More than 2 years ago na yun. Still no problems. Then i bought my zenfone selfie, mas kasama din headset, great sound din, pero lesser bass ng konting konti dun sa earphone ng padfone 2. Right now ims still using the ones that came with the p…	dgmxrdk	t3_670t9p	t3_670t9p
shawndur	Philippines	1517840002	37	Tagalog	English	kunin mo pics sa mga life ng mga security sa mall. yung greet sila ng good morning maam sir, tapos hindi sasagot si mam at sir. nakasimangot si mam dahil kukulgin ang mamahaling bag nya.. ano kaya faces nila.. do the guards just smile it off.. just coz nobody got caught with a bomb in their bag doesnt mean theyre not doing their job lang..	dtrpp2o	t3_7ve6fx	t3_7ve6fx
mjforn	Philippines	1546431353	45	Tagalog	English	Parang ganto nga ata yon. Kasi ayaw nila isend ung terms nung contact hanggat d daw ako nag eenroll. Kung ano daw ung sinabi nila na 8 na benefits, un lang daw un basically kaya sabi ko tawag na lang sya ulit. Anyway, did you happen to see the proposal? How was it?	ed2oek6	t3_abs13c	t1_ed2nnwd
3_1415926535898	Philippines	1512122155	45	English	Tagalog	Pwede na syang isama. Nung nagbook ako ng international flight this May, meron nang option to pay. So pagkabigay sa akin ng boarding pass upon checking in nung flight, sa immigration na ako pinaproceed.	dqlp1h5	t3_7glb8o	t1_dql6e9u
MiniMicroMacro	Philippines	1491032947	43	Tagalog	English	Tried Tinder last year out of boredom. And I'd like to meet new friends (de seryoso lol). Kind of creeped out when I found out that this guy I'm talking with is the best friend of my colleague. I went from yay to nope real quick! Hahaha ayoko kasing malaman ng lahat na nagtiTinder ako hehe. And ayoko namang sirain ang momentum ng relationship nila. Simula't sapul sila na. Hehe di ko na ipagsisiks…	dfop3nx	t3_62ofr2	t1_dfoorg2
santodeupo	Philippines	1500711279	28	English	Tagalog	Sa Glorrieta, di imax pero malapit kc at umuulan so nanuod na lang ako palipas oras. Kakaiba ang approach ni nolan sa pag gawa ng movie na eto, di siya magugustuhan ng karamihan ng mga kilala ko. For me, It's a fresh approach to a war movie, a serious and different way of portraying the events in Dunkirk. Malaking Bonus ung sound track ni Hans Zimmer, pde ko isara ang mata ko at ma aapreciate ko …	dkk6hyd	t3_6or5kp	t1_dkk6b6g
toshiiiiiiii	Philippines	1534293987	30	English	Tagalog	Yun lang. Sayang. Normal ba yan sa field niyo na 1 year bago makakuha ng leaves? Samin kasi automatic na pag 6 months mo may leaves ka na and na process na yung mga papeles mo on the 5th month para magbago na yung status mo from Probationary to Regular. Kaya nga may leave para hindi mababawasan yung sahod mo pag umabsent ka. Given na nagpaalam ka ng 1 month before the date na mag leave ka. Labo n…	e47gcji	t3_97cl20	t1_e47fqs8
negatorious	Philippines	1489832208	33	English	Tagalog	Yeah it's great but some people here do not seem to understand how instruments work when being played at lower temps. Maraming stringed instruments like the cellos and violins na nasisintunado talaga dun sa contest. Hindi lang yun dahil hindi magaling yung musician. Hindi na prep at natono siguro ng tama yung mga instruments bago iplay.	df360oh	t3_5zxeve	t3_5zxeve
cerulean00	Philippines	1549461217	45	English	Tagalog	Ako ba yang friend mo? Tagal ko din naging freeloader tapos super gamer din ako. Natanggap ako the other day sa call center pero voice ata. Tingin ko mas mag eexcel ako sa non voice eh. Kaso yung account ata namin di pwede (it's like globe or smart sa US) lagi ako nagsesend ng email sa customer service ng game company pag may maling transaction na nangyari sa account ko or other problems. Wish ko…	efva9iu	t3_anp82i	t1_efv44up
codpiecesalad	Philippines	1546960788	19	English	Tagalog	What actually sucks is yung patago na racism. I live in Europe now, and i notice yung daily, medyo patago na racism is much annoying kase its difficult to confront people about it. Pag me puti ako na kasama nagsa shopping, yung iaapproach is yung puti, hindi ako. Pag magbabayad sa restaurant, yung bill sa puti ibibigay hindi sa akin na humingi ng bill. Pag gusto ko mag try ng expensive na stuff l…	edkboi1	t3_adow9v	t3_adow9v
MLMguyAMA	Philippines	1509547359	39	Tagalog	English	wow experienced! pashare po ng experiences baka may matutunan ako :) sayang di po nagwork out for you. ang natutunan ko naman, kung alam mong maganda ang products mo, or kung maganda nga naman talaga, alam mo na agad na hindi yun yung problem. so anong problem? edi ako! haha. ang maganda sa story mo tho, nadadalian ka ibenta so dun palang may extra income ka na. ako nga hirap magbenta ng products…	dp6vceq	t3_7a0s7z	t1_dp6ue7l
Siegfried024	Philippines	1515332624	40	English	Tagalog	Nagpatubo nga ako ng bigote at balbas para lang magmukhang matured. Wa epek ang corporate glasses eh. Haha. Plano namin next time mag bed and breakfast, for experience lang.	dsbhjc8	t3_7oowni	t1_dsbgrp8
PotatoMurderer	Philippines	1407463845	41	Tagalog	English	I don't mind the group pics before eating as long as there's a special occasion like birthdays/balikbayans/reunions etc. Pero kung picture kasi naisipan lang, then bahala kayong kumhua ng picture habang inuubos ko yung sisig natin.	cjk4uts	t3_2cxb6i	t1_cjk3wap
misschurros	Philippines	1494425833	36	Tagalog	English	I've never attended a wedding where they ask the guests to dress in their color motif though. Usually abay lang nakasunod sa motif. Parang medyo mahirap kung papasunurin mo lahat ng guests sa 1-3 colors lang. Kahit nga lenient sa dress code dami pa din pasaway eh haha!	dhdibec	t3_6abtqr	t1_dhdi5fx
steban27	Philippines	1508060358	45	English	Tagalog	I think the rebels were asking that ALL political prisoners be released before continuing peace talks, paano magbabargain ang government kung lahat ng leverage nila pakakawalan?	doe5agy	t3_76i24d	t3_76i24d
ilikecitrusfruits	Philippines	1513383607	32	English	Tagalog	I just had a reunion with my college friends after 7 years, last weekend. Dun ko narealize na ~~matatanda~~ tumatanda na kami, ibang level na ung usapan, adulting. Married life, how to take care of your child, finances and investments, mga ganun na. Pero syempre di mawawala ung mga pinaguusapan parin namin ung mga past katarantaduhan namin hahaha.	drbc1i5	t3_7k2xhi	t1_drbb4ze
akantha	Philippines	1521261395	48	English	Tagalog	Matagal talaga ang shipping pag Black Arrow. Wag kang maniwala sa express part ng name nila, haha. Usually ang time frame sa kanila 2 weeks bago mo makuha ung item. In this case, booked means si seller nag schedule na ng pick up ng item kay Black Arrow para madeliver na sya.	dvu1y1u	t3_83q18n	t1_dvtnwmw
merdionesmondragon	Philippines	1508863384	44	English	Tagalog	nakakahiya itong mga DDS na sumusulpot sa social media. When they get screechy minsan nagfafantasize ko na duraan silang lahat sa mukha. And yes some of them are friends.	dotpivy	t3_78f0je	t1_dotklj2
jpaolo009	Philippines	1469280885	49	Tagalog	English	Umalis ako kahapon dahil umuwi ung lola at tito ko from canada. Stayed in batangas for 1 day. Paguwi ko, umulan ata ng malakas sa cavite. Nasa tapat ng bintana ung laptop ko at nabasa. Nalaman ko lang after trying to turn it on. Nakasaksak sa plug yung laptop ko the whole time. Hindi na nag oon. Wala pang 1 year yung laptop ko. 41k bili ng mama ko. Nanghihinayang ako ng sobra kasi baka di na maga…	d5nlday	t3_4u7n0u	t3_4u7n0u
redkinoko	Philippines	1471944344	48	Tagalog	English	Oh sure pag yung mangingisda nagpakita nung lucky charm nya it's worth 100 million pero pag ako yung nagpapakita ng mga nasa ilalim ng kama ko "manyak ako at dapat ko isoli yung mga panty ni yaya" Double standards talaga!	d6t0ye4	t3_4z4lc6	t3_4z4lc6
Kuneh9	Philippines	1531604456	43	English	Tagalog	Exactly! Magkano minimum wage dito? Sino magiging independent pagkatapos ng high school gamit ang minimum wage? Kaya bang humiwalay sa pamilya at mag rent ng solo kapag minumum wage earner ka? Lets be real people!	e2e9ot0	t3_8ythzy	t1_e2e3k74
technogfunk	Philippines	1521070376	26	English	Tagalog	Paulanan nyo lang ng scandal, mga urong bayag na yan, tignan nyo, sinasabi ko sayo bukas lang limot na yan ng mga hidiputa. I dare them do something! I've been waiting, waiting for so long but nobody, nobody would take the bait! What would it take ha? W.H.A.T W.O.U.L.D. I.T. T.A.K.E.?! Putanayan napurnada na martial law ko nalintikan na. - Digong ranting to Bong Go probably	dvpp19h	t3_84evnt	t3_84evnt
syllababbled	Philippines	1513820090	6	Tagalog	English	- was going home from school at the end of the week non, it was 5 pm on a friday kaya sure na traffic. To stave off the hunger, bumili ako ng mumurahin na tinapay sa bakery malapit sa tinitirhan ko. Sumakay ako ng jeep at sinimulan kong kainin ang mga tinapay. Pag hinto ng jeep sa may Pedro Gil area sa Taft, may sumakay na bata na namimigay ng envelope. Since wala naman akong pera, inoffer ko na …	drjsyi7	t3_7l1ocy	t3_7l1ocy
haatorii	Philippines	1484668910	37	Tagalog	English	My coworkers voted for him too. Why? Kasi daw second chance. Sige, second chance. Why not? Ngayon nagkakalat siya sa senado tapos ang iba gusto pa siyang tumakbo pagka presidente. What?	dcjl109	t3_5ohvgs	t1_dcjife0
4PlayPal	Philippines	1549382916	46	Tagalog	English	Actually, haven't traveled going there bringing my own car for a very long time. But, since it is a long travel, kawawa naman vios mo for some bumps sa mga daan. Pero kung sa mga humps eh kaya naman ng sasakyan mo, pwede na rin.	efswpyn	t3_an5akj	t1_efsdjis
mydickisasalad	Philippines	1538356720	42	English	Tagalog	Weakness ko talaga yung outfit na kita yung tagiliran ng babae tapos kita yung bra(kung meron). I have enough decency in me to not stare at a woman without her consent, but lord please grant me the strength to not stare at a lady's sides when she has that on. Tapos pag may tattoo pa, wala na. Nahulog na ako.	e6xz6uj	t3_9kaeet	t3_9kaeet
Obi_Mona	Philippines	1531630742	34	Tagalog	English	Nag smart ako, may option na ihahatid sundo ka or use your own vehicle mas mahal lang syempre pag ganun ang pipiliin mo. Pero mabait at hindi abusado yung smart na pinag enroll an ko sa Nova. Nung minsang super lakas ng ulan nagcancel sila kase sayang daw hours ko kung mastuck sa traffic.	e2ew80y	t3_8yyjkh	t3_8yyjkh
Electro_Orange	Philippines	1543892338	34	Tagalog	English	All work, no glory ang role ko dito sa office namin. Pagkatapos ko paghirapan yung concept, ipepresenta nung iba as if sila talaga nag-isip. Minsan di ko na alam kung hanggang saan nirerequire ng kumpanya ang pagiging "team player". Kahit simpleng "thank you" man lang or at least malaman nung mga tamang tao na sakin galing yun. Oh well. March on, soldier. I'm a gritty afterthought, after all.	eb1ndot	t3_a2tjcg	t3_a2tjcg
_newbread	Philippines	1546483329	19	English	Tagalog	A win is a win, as long the winner followed whatever rules/procedures were used. But, ndi naman masama maging critic. In fact, go ahead and put him under a microscope. If you think he's doing something that will hurt the country, go ahead (open to conversation naman mga tao wag lang ung if you disagree, anak ka ni satanas). And true i said that. So, what do you want them to do? Force people to vo…	ed4gfwa	t3_absg7j	t1_ed4fpp0
dikomamen	Philippines	1531337219	47	Tagalog	English	sa lahat naman siguro ng rts games ganyan. High rank games = low toxic players. tagal ko na din d nag lol pero from my experience mas madali bumili ng high rank lol kesa sa high mmr dota2 accounts.	e27kucx	t3_8xz08j	t1_e27kkb6
throow12	Philippines	1535580502	41	Tagalog	English	When it comes to internet: 1. Little to no Scam in IRC/YM. halos none existent pa yung mga taong gusto kang lokohin at karamihan gusto lang ng kausap o magiging kaibigan or ka-ibigan. 2. Pre-monetization era blogging... yeah scratch that, let's do it pre-monetization era internet, di pa ganon katalamak yung pay per click or views para kumita at I guess kakabit niyan yung sa una kong sinabi, sigur…	e52941l	t3_9b9js0	t3_9b9js0
tsunilly	Philippines	1511332406	47	Tagalog	English	Short anxiety story. Had lunch at Bon Chon. I didn't know they had an anniversary promo today, so I was surprised when I got 4pcs of chicken (all leg part though). Not feeling gluttonous or diet-dietan reasons, I just decided to give away the extra meal to a random guard outside. I approached a guard and offered, but apparently bawal sila tumanggap ng kahit ano huhu. Di pa siya tapos magsalita, n…	dq6haxi	t3_7enz2v	t3_7enz2v
EldenDawes	Philippines	1497414612	29	Tagalog	English	[NSFW] May sexual urge yung wife ko kaninang umaga. Nauna akong magising eh maaga pa so naglaro muna ako ng Mobile Legends. Pagkagising nya nagyaya bigla. Eh nasa kalagitnaan na yung game. Hindi ako pwede umalis kasi tangina, Ranked Game yun. So sabi ko mamaya muna pagkatapos na lang. Ginawa nya pumatong siya sakin habang nag lalaro ako. Kala ko hindi ako titigasan pero na magic nya kaya tumigas.…	divmuch	t3_6h53kv	t3_6h53kv
Maruyang_Saging	Philippines	1527048906	32	Tagalog	English	* burntout pa ako makipagusap sa mga babae. My patience is wearing thin recently. * ang bobo ng last message niya: "Sheesh hahaga", wala ako sa mood na umusisa, she can expound if she wants. * kung wala talaga siyang interest sakin, it's no big deal kung di ako interested makipagusap. ^kung ^mahulog ^man ^siya ^saken ^mahirap ^na ^kase ^di ^ko ^siya ^sasaluhin. * pakyu siya.	dzfeblj	t3_8lge7m	t1_dzfdrqo
iristothemoon	Philippines	1535512958	28	English	Tagalog	Hmm that's pretty expensive for me.. unless kasama na plane tix tapos di nila nakuha ng sale kaya ganyan. I always stick to a budget of 10k all in to local travels and save 1 month or so prior to travel dates tapos pag international 15k and up all in depending on the length of my stay tapos mga 2 to 3 months before nagsasave na. Before I used to spend shop and eat a lot outside but natuto nako ma…	e50kx6m	t3_9b3817	t1_e50j9v4
sappororamen	Philippines	1546956890	39	Tagalog	English	Nainis lang ako sa comment ni Ai-Ai de las Alas nung nag holiday ako with my family in California. Syempre tuwa kami nakakita ng Pinoy celeb habang shopping. Nag request kami ng photo pero parang masyado namin na agrabyado. Gusto pa naman ng mum ko solo photo with her pero comment niya sa bodyguard niya kaagad di pa kami nakakahirit ג€Kuya kuhanan mo kaming lahat ng picture para isang bagsak na …	edk74eb	t3_ads46g	t3_ads46g
napster244	Philippines	1519802099	41	Tagalog	English	nasa 500 dollars ticket pag wala sale. tapos agoda panghanap hotel around 600 dollars 4 nights. tapos mga pagkain at pang tren then tour like disney, studio ghibli, fuji, mukhang papalo na siguro 2k dollars gastos..	duy837o	t3_80t169	t1_duy7w7w
Yulshus	Philippines	1536977960	48	English	Tagalog	I was wondering kung ano kaya ang pinagkakaabalahan ni Archimedes at naisip nyang i-estimate ang *pi* ~~^wc ^is ^not ^called ^pi ^at ^the ^time...~~ Did he know that it will be relevant in future generations? Hmm... נ₪”	e601w7t	t3_9fw7so	t3_9fw7so
retsujin	Philippines	1507190741	25	Tagalog	English	nag aask lang po si koya sa taas kung makikita ba o hindi. nakaprivate ang silentnomoreph kaso may ibang domain na nakapublic (before?) which is nai-link ni TP through similar google ad id. so ayun po, Mr IT Specialist. ngayon kung ikaw ang tutuligsa sa gobyerno, ilalagay mo ba ang google ad id mo or i-proxy mo sa ibang google account?	dnxnvkm	t3_74chrv	t1_dnxnkh0
jootsie	Philippines	1473143490	49	English	Tagalog	Probably just give them time at dahan dahanin ang pagimpart sa kanila ng knowledge na ang internet ay hindi lamang pang facebook at paglalaro, thats what I do. Pero nung HS to 2nd year College talaga yan lage ang bunganga saken.	d7b7u0n	t3_51btre	t1_d7b7ktd
tisotokiki	Philippines	1544001132	31	Tagalog	English	Habang naglalakad ako papasok sa office, may kinaladkad siguro mga walong pulis yun. Apparently, scalper ng ticket para sa game ngayon sa Araneta. So being tsismosa, sinundan ko sila. Ang laki ni kuya at ang lakas ng boses. Nakatutok agad yung camera ng ABS-CBN sa kanila hanggang i-escort siya papunta sa patrol car. Scaryyyy.	eb4n0ab	t3_a38j13	t3_a38j13
lecterdrago	Philippines	1543702412	13	English	Tagalog	This will be a harsh one. Tell your parents BUT with the family setup in Philippines they will condone it. So next is. Confront your brother like the comment before this he might end up dead. The drug war of Pdutz is real as hell pag minalas kapatid mo baka susunod pinag lalamayan niyo na siya. Real talk lang. Address the issue now. If heג€™s a dealer now next time heג€™ll be abusing his own supp…	eavqq3j	t3_a25f6e	t3_a25f6e
naRs_siSo	Philippines	1538517804	22	English	Tagalog	It's possible that it was repealed because it can also be a stupid move. (advantage sa mga opposing party, strategic move nung mga nag repeal) Consider Binay and Duterte, Binay proclaimed his bid on the presidential election early, i think he was a strong candidate at the start but kalagitnaan ng election sirang sira na sya. Duterte on the other hand kept on denying na tatakbo sya as president fr…	e72016g	t3_9kue5u	t3_9kue5u
LazyCup1	Philippines	1543387635	20	Tagalog	English	Kwento pang alas juicy : 2 or 3 weeks ago. Meron convention. Dumating yung mga customer namin na galing sa probinsya. Merong distribution business yung boss ko. Mostly mga partners in business at mga customer sila. Hatid sundo sila namin. Di naman ako empleyado sa company dahil personal na driver ako ni Boss pero Inutusan ako na mag drive muna ng company car since kulang yung driver ng company. P…	eamjadn	t3_a12jio	t3_a12jio
candidpose	Philippines	1498924646	48	English	Tagalog	Bakit sa tingin mo hindi ka interesting? At bakit kailangan mong maging interesting sa kanya? Basically tanggalin mo yung mindset na may expectations ka na kailangang imeet, then the cliche "be yourself". Kung hindi nya matripan kung ano ka man eh diiiiii hanap ng iba jk good luck though!	djneeth	t3_6km79n	t1_djndfsl
iiK0	Philippines	1538645155	21	English	Tagalog	I have a friend who had the similar story as yours before. Closed Gay siya, medyo maunti lang din nakakaalam sa amin (friends) na gay siya. Nag-open up lang siya nung umamin ako na F-Bi ako. Medyo nag loosen siya ng tension sa sexuality niya. Siguro kung hindi ka openly gay, try mo to talk to a person who you can really trust and ask for some simple advice. After nun siguro nga yung sinuggest ni …	e755gse	t3_9l9j3d	t3_9l9j3d
mydickisasalad	Philippines	1539253491	49	Tagalog	English	pati yung video! &lt;3 may nagpatugtog neto kanina sa office and I immediately started to look around to see kung sinong nagpapatugtog. HAHA. puro kasi k-pop patugtog sa office.	e7kef0s	t3_9n8j5a	t1_e7kea89
Truman_Jack_	Philippines	1548914258	47	Tagalog	English	Don't mind the downvotes, it's their opinion. but the fact na di nila nakikita na yung klase ng tao na kinakaayawan nila, eh ganun din naman sila. Oof.	eff5fy2	t3_aldj3l	t1_efe1513
sunnynightmares	Philippines	1542914031	35	English	Tagalog	Ang nakakatakot din yung rape threats against his gf and sisters. Pero diba ang stupid ng ginawa nila? If anything happens to him or his loved ones mas lalo masisira frat nila. So its either another frat destroying them even more, or ang tatanga ng mga members ng frat na to.	ea927zw	t3_9zfis2	t3_9zfis2
zhern01234	Philippines	1458047913	38	English	Tagalog	Is it that really that bad to hang out with your son's boss? Yung mga tauhan ng daddy ko is really forced to hang out with me kasi wala akong friends (real friends) I just don't want to be used yung magpapalibre lagi sila sayo yung uutuin ka lang. I want to have the kind of friends na kahit walang wala ka sasamahan ka nila.	d10k4s4	t3_4ahs7d	t3_4ahs7d
ploxypotato	Philippines	1535815728	31	Tagalog	English	wala naman kaming sinasabeng tama yon eh. Trying to use the trolls on FB just to validate your point is kinda meh. Ang focus lang ng comment ko ay yung ginawa nya at kung bakit d mo nagegets kung bakit naiinis ang iba sa kanya pero heto ka naman, at ginamit ang mga trolls sa net para may ipang counter ka, LOL	e57s1sc	t3_9bzsbi	t1_e57dr34
withmoreintensity	Philippines	1545350091	26	English	Tagalog	This is so sad. Akala ko 1 incident lang, mukhang ginawang hobby na ng bata mambully. Bakit hinahayaan ng school yang ganyang ugali? From the looks of the video, mukhang may katropa pa yung bully... they should also be investigated. Ayan yung malungkot sa mga biktima ng pambubully, others just standby and let it happen. Parang wala nagrereport ng bad behavior	ec7si7x	t3_a845j0	t3_a845j0
sephluy	Philippines	1520410517	39	Tagalog	English	Gsto ko magfasting. Nakatry na ko for 48 hours. Isa lang major problem ko. Tuwing hapunan sabay kami pamilya kumaen. Nung nagfasting ako umupo lng ako habang nakaen sila. Na kaya ko for 1 try tas day 2 ndi na ako bumaba. This time, I don't want to miss a single dinner opportunity with my mom lalo na't kaka abroad lng ng erpats. Kasooooo... Gsto ko magfast. Tips pls para ndi matempt. P. S. I love …	dvb8y3z	t3_82ldhk	t3_82ldhk
Oreki-saaan	Philippines	1524057904	43	Tagalog	English	hello, I asked this before pero wala nag reply so sana this time meron na background: nag quit ako sa uni dahil hindi ko gusto ang magiging future ko as IT. Naisip ko mag vocational ako kesa mag-college graduate after magrecover ang mental health ko. Sa mga nag-undergo ng training sa TESDA, pwede po ba paki-detalye ang application/enroll, yung courses, basta lahat... hindi ko alam saan magtatanon…	dxke2te	t3_8cinoy	t3_8cinoy
xlourenze	Philippines	1521083964	46	Tagalog	English	Bsa tower sa gilid or roofdeck ng building mo if allowed and access sa inyo. Sa sa ruby likod ng emerald building madami nagyoyosi dyan kasi may construction site kasi pwede sila magtago	dvq1jq4	t3_84i1v1	t3_84i1v1
iJeiCee01	Philippines	1529149965	43	Tagalog	English	As the other user said, medyo fishy yung company na yan. About sa UMID, kailangan may 3 months worth of contribution ka bago ka makapag apply ng UMID. TIN naman dapat HR maglalakad non, magbibigay ka lang ng BIR Form 1901 sa kanila. Pero kausapin mo muna HR about sa contract mo, baka mamaya madehado ka pa. Good luck!	e0rmzab	t3_8q4b77	t1_e0rbjty
RenrewHeisenberg	Philippines	1526402604	42	Tagalog	English	Does anyone know the exact requirements para sa pagkuha ng Passport? Nagsearch kasi ako sa google and karamihan 2015 nakikita ko, baka kasi binago/dinagdagan na nila yung mga kailangan. TIA!	dz0usl0	t3_8j7dz9	t3_8j7dz9
mokujinx	Philippines	1507181660	33	Tagalog	English	Not necessarily walk out ang ginawa ko, pero dinismiss ung date halfway. Nagdahilan ako na bigla akong on-call sa work tapos hinatid ko na lang din pauwi out of courtesy. She is pretty, pero nilalait nya lahat ng nakikita nyang babae na hindi kagandahan. tapos masyadong clingy para sa first date.	dnxk4b7	t3_74djcz	t1_dnxiv7n
TCTLIDS	Philippines	1543089467	42	English	Tagalog	Kahit mas-interesting ang Boston i-explore kesa ke Vegas (except for the Vaults - Vegas has more interesting Vaults), nowhere near as memorable ang cast, kaya parang mas-forgetable at boring ang 4 (and it feels emptier too as a result). Ang tedious pa ng settlement building mechanics ng 4. OK sana kung isang settlement lang eh, pero, pucha ang dami tapos most pa ng settlement building locations a…	eadrz46	t3_9zx63c	t1_ead6ohy
Uniquer029	Philippines	1537769868	29	English	Tagalog	Farm. Tapos hihingi ako ng tulong sa mga homeless para gumawa ng beta self-sufficient community. Invest na din sa mga business na low risk but profitable. Pati personal security. Kung mas matimbang ang pros kaysa sa cons sa beta self-sufficient community, i'll go extend it to other communities.	e6jb0nn	t3_9if27k	t3_9if27k
jootsie	Philippines	1518178621	36	Tagalog	English	Got UTI(not due to sexual intercourse) during a 3 day editing session getting like 3-4 hours of sleep. Pretty sure di ako masyadong nakakainom ng tubig noon at mas madaming sugary drink ang iniiinom ko since kasabay ko siya sa pagkain at pagyosi.	dtzc8az	t3_7wbhy1	t1_dtz5w5r
Yamarai	Philippines	1507596952	43	English	Tagalog	Nakakainis, lagi nalang akong biktima ng roleta ni prof. Highest ako sa midterm exam, mataas ang grade ko sa reporting, ang dami kong recitation tapos ang midterm standing ko ay 2.0? Samantalang iba na nakatunganga lang during her class naka 1.5 and 1.75!? What kind of sorcery is this prof? Huhuhuhuhu btw Good morning!	do5cf1x	t3_75cisg	t3_75cisg
koyapres	Philippines	1457359786	31	Tagalog	English	Parang ano lang kasi, I feel disconnected with my neighborhood. Actually wala na akong nakakausap dito (except on our one neghbor na nakakausap ko lang kapag nanghihiram ako/siya ng gamit). Tsaka wala akong makausap na tao dito, 'di ko na sila ka-vibes. Pero oks lang naman kasi may reddit naman.	d0qqe2k	t3_49byno	t1_d0qpxvh
decadentrebel	Philippines	1540558928	49	Tagalog	English	Sana naman yung concern nung Solaire extends to human fucking beings. Kawawa mga non-smokers na gusto lang naman kumain sa food court kasama mga bata o manood ng play pero walang choice kung hindi langhapin yung second hand smoke ng mga nagii-slot machine at blackjack.	e8hirbh	t3_9rjq6q	t3_9rjq6q
angmalakas	Philippines	1460517962	18	English	Tagalog	Yes per month yung salary n sinasabi ko - 50k/month and ~100k/month. And madami k ring pwedeng passive income. Kung frontend dev ka, gawa k lng ng mga templates then publish mo sa mga marketplace like themeforest or gawa ka ng mga games or apps then publish mo sa googleplay or appstore. Or gawa ka ng platform and deploy mo as SaaS. So bukod sa monthly salary mo eh meron ka pang passive income. Or…	d20qcr5	t3_4efj1e	t1_d1zv4e9
misschurros	Philippines	1502949120	22	English	Tagalog	Okay, if you're taking a Skyjet flight you'll be there by 8AM. Request for early check-in if you can, but if not that's also okay. Just leave your luggage then you can start your day na. I highly recommend Bravo Beach Resort, and look for ate Jem 'cause she's the best &lt;3 Day 1: arrive at GL, check in, you may go to Magpupungko Rock Pools depending if maabutan niyo ang low tide. If not maybe yo…	dlqnigi	t3_6u7hgp	t1_dlqmkp1
glanne	Philippines	1510972694	18	English	Tagalog	Not a medical practitioner pero sa Hi-Precision din ang APE namin ang I had the same findings. Tapos siyempre nakaka-panic at first kasi ano yung suspicious? Eh ayos naman yung pakiramdam ko, ganyan. I opted to take yung ni-recommend na another x-ray, tapos ang findings ay wala naman. May faint scar lang ata sa lungs ko. Told my officemates about the whole thing tapos sabi lang nila, marami din s…	dpzlg85	t3_7doako	t1_dpzkl8t
Packyaw21	Philippines	1445215650	12	English	Tagalog	Ndi mo prin ineexplain yun dumi ng mga Aquino. Point blank alam ko may mga kasalanan mga Marcoses. Ikaw ndi mo matanggap yun mga maling ginagawa ng mga Aquinos. You make my point by your blind homerism. I repeat i am not pro Marcos- your views by name calling and thinking your the smartest one in the toolshed blinds or actually narrows your view point. No I'm not downplaying the fault of the Marc…	cw4mdin	t3_3p2ino	t1_cw4l2cg
Mr_Connie_Lingus69	Philippines	1471493661	11	English	Tagalog	Depende naman yan, pero for me di ko madelete kasi my closest friend (lagi kainuman at kapag may happening) eh andun at may group chat kami kung saan araw araw kami nagmumurahan at naggagauhan at bastusan which is good kasi pangtanggal stress sa work and all that shits.. communication platform din with my family na nasa probinsya na. The thing is, (again atleast for me) kapag may nakikita ako cri…	d6m70n2	t3_4y8yjm	t3_4y8yjm
memekun	Philippines	1530537685	41	Tagalog	English	To all the people na nakakahiya ang Gilas dahil pumatol? Let me give you a quick background kung ano nangyari during the game: * Aussies kept complaining na lumalagpas daw yung players sa line kahit hindi naman * Inaasar ng mga aussies yung isang player ng Gilas while making his free throw * Kahit daw nung warm up pa lang may girian na na nangyayari, pero there were claims na hindi na lang pinapa…	e1nkrvk	t3_8vie0a	t3_8vie0a
kikokiko123	Philippines	1475655211	29	Tagalog	English	Siguro dahil ito last appraisal eh, I pointed out ung mga mali nila. Na they are not doing something for lower employees. Ako lang nagsalita sa section namin, simula nun pinaginitan na ako eh. kasi ung iba puro oo lang Di ko alam kung kaya ko pa makita ung mukha ng SV at Manager ko eh. Tagal ko na hinintay ito eh. Sila bagong salta lang, ngaung fiscal year lang, 3 years na kasi ako.	d8ersfb	t3_55w270	t1_d8erilc
scubadance	Philippines	1425012635	27	English	Tagalog	Medyo strict sa dress code yung company na napasukan ko. Pag probationary dapat naka white shirt (with sleeves and collars) na walang kahit anong print o ibang kulay. Dapat dark colored pants or skirt. Nawasak ang pangarap ko na mga cute peter pan collared shirts na colored ang collars. Akala ko din may magagamit ako na chinos ko kaso light brown yung kulay. Tas pag maregular ako, may uniform. I …	coyn965	t3_2xa3th	t3_2xa3th
Riesig19	Philippines	1476363453	38	English	Tagalog	Sa sports pa lang eh, mas maraming natutuwa sa basketball pero statistically hindi tayo consistent makipag compete. Anong nangyari sa mga talents natin, nagiging katulad ni Wesley So or na discourage from the start kasi konti lang may gusto sa sport nila. Entertainment, kaya puro masa films lumalabas sa MMFF kasi ruled ng majority, turning the whole Filipino movie industry into a joke.	d8q67cq	t3_57993r	t3_57993r
EyeKeenSee	Philippines	1486609030	32	Tagalog	English	Hindi naman mawawalan ng paghihirap sa buhay maski sa ibang bansa, marami pa namang maganda sa Pinas despite of Marcoses making some noise again. Ginusto natin yan dahil nabale ang atensyon natin. Kung sangayon masaya ako dahil buhay pa at maaaring makatulong in my simple ways to help our country struggle out of corruption.	ddikx1s	t3_5svtcq	t1_ddigs98
syaochan	Philippines	1530889331	41	Tagalog	English	Yan ang isa sa mahihirap na part ng pagiging teacher. Kung programmer ka, after-work may pictures ka na tumatagay, okay lang. Pero kapag teacher, dala mo yung image mo hanggang sa labas ng school (lalo na HS yung tinuturuan).	e1w75po	t3_8wkef9	t1_e1w5m7e
idkymyaccgotbanned	Philippines	1546376153	25	English	Tagalog	Nah No work = pabigat sa pinas? I really donג€™t get it. Walang nakakahiya dun, at least youג€™re trying. Mas pabigat yung d talaga nag-aapply and masyadong umaasa sa iba Anyways, baka masyado mong dinadown sarili mo. It could be a factor kung baג€™t d ka natatanggap. Are you trying to learn relevant skills while youג€™re applying? Or reviewing what went wrong or did you search what you need to l…	ed19qs2	t3_abj5r9	t1_ed18o1x
BucciGangster	Philippines	1534872906	35	Tagalog	English	Grabe pala, no? Ang hirap pala talagang mag-move on sa isang taong most likely masaya na sa iba, lalo na kung halos araw-araw mo siyang nakikita sa trabaho at sa Instagram Stories niya kasama yung guy. Kahit hindi pa talaga sila, tuwing makikita mo silang magkasama, magkahalong selos at inis sa sarili yung nararamdaman mo. Selos is self-explanatory, pero yung inis kasi alam niyo yung tipong you h…	e4kz9ih	t3_994c3z	t3_994c3z
nrkw	Philippines	1416662171	49	Tagalog	English	UV to lawton. Baba ka sa manila city hall or lawton then ride ng jeep papuntang espanya. Kung araw ng test, asahan mo nang mejo traffic. Dadagdag yung nga mageexam sa normal na load ng espanya.	cm9s8wd	t3_2n2n0a	t3_2n2n0a
i_hate_katherines	Philippines	1519289747	37	Tagalog	English	You can tell them outright na IEM ang gusto mo :) Naka isang IEM nako kay Egghead (less than 2k din binayad ko, Dunu yung brand iirc) at ilang IEM (two KZs and a Xiaomi) na din kay Techshop. Punta ka lang dun at tanong mo "anong magandang IEM for 2k?" tutulungan ka naman nila.	dun6tf5	t3_7zda9u	t1_dun6o71
TinderelloPH	Philippines	1508887503	47	English	Tagalog	Story Time from your friendly neighborhood tinderman &amp;nbsp; For the first time in forever, finally personally met a tinder match. Ang bilis din ng escalation. Nagmatch kami nung umaga and then decided to meet sa gabi. &amp;nbsp; So nung nagkita na kami, medyo expected ko na malupit siyang mag pose since slightly iba itsura niya. But not bad baby face si ate (pati height :P) . We decided na ma…	doucd9k	t3_78j5sr	t3_78j5sr
77putingtupa	Philippines	1502089969	43	English	Tagalog	Mostly dapat may partner silang clinic kung san ka dapat magpapamedical. Pero kung wala, you can check out small clinics in your area, most likely meron silang pre-employment packages that cost less than 1k (around 500-700php lang)	dl9vi23	t3_6s35ix	t1_dl9v954
bestevereskinol	Philippines	1544199648	31	Tagalog	English	Yup! 3920 to be exact. Kaso wala pa dyan pool fees ng partner venues (di naman din masyado masakit sa bulsa so ok lang). 2500 tapos 4 sessions lang? Mejj mahal 'yan ah saan 'yun? Oo meron! Bale 6 na basic sessions tapos 2 na survival dun sa 3920. Pero ngayon pwede na isang survival session kunin mo tapos 350 ata per session? Kuha naaaa para masulit ang resorts and beaches haha	ebapqgb	t3_a3yi8h	t1_ebakqua
yayoio	Philippines	1529579995	44	Tagalog	English	I think na dito ko na lang itatanong instead na gumawa ng thread. How much for PLDT pre-termination fees? Sabi kasi eh 3xMSF, sabi naman eh MSF x remaining months. Saka wala na yung nakapangalan dun sa account kaya pwede namang via rep, no?	e11j963	t3_8rufwz	t3_8rufwz
CeejP	Philippines	1504567818	49	English	Tagalog	Is that the Australian lady reviewing Jollibee's foods? Parang OA naman un sa sensitivity sa tamis eh. Pati ung tinapay ng burger natatamisan siya. Though karamihan din kasi sating mga Pinoy ay sweet tooth kaya mahilig sa matamis.	dmki1py	t3_6xzpon	t1_dmk4j2l
buzzedaldrine	Philippines	1474714624	25	Tagalog	English	shoplift pa din ba pag di talaga tinda ng store yung kinuha ko? meron kasi sa saleslady na gumamit ng sticky notes for something. iniwan nung saleslady sa shelf, first time ko makakita nun, hangang hanga ako, kinuha ko. kasama ko nanay ko at bunso namin kapatid, noon nasa bahay na pinakita ko sa kapatid ko, sabi nya 'san mo nakuha yan? nyay kinuha sa SM, susumbong kita, Mommy si kuya nagnakaw" ka…	d7zzwpt	t3_549iyn	t1_d7zz9do
treeperfume	Philippines	1496325892	46	Tagalog	English	Plus PERC, ORE, BC and BCB. Yung 30% yung per annum return since I started. I compute my portfolio's performance like a mutual fund. May shares at NAVPS. I don't trade every day. Ngayon lang medyo madalas kasi I'm buying. Usually pag naglalabasan lang yung mga financial reports tsaka ako napapatrade. I'm a programmer.	dibfh50	t3_6elqd5	t1_dibeusb
KappaccinoNation	Philippines	1480245889	37	Tagalog	English	First advice na binigay sakin ng friend ko bago ko sumama sa kanya sa gym is always bring gym clothes. "Walang pang workout" daw kasi yung kadalasang pang justify ng mga tao sa sarili nila pag ayaw nilang pumunta sa araw na yun eh. Second advice niya ay wag mahiyang magtanong. Seriously, dudes and dudettes in the gym are some of the nicest people you will encounter. Yung stereotype na pag nag gyg…	dahh5g5	t3_5f4nbc	t1_dahghv5
pm_me_your_kilay	Philippines	1522391972	35	Tagalog	English	sa fb kasi ngayon kapag itatag mo ung tao sa post naka default nang naka choose ung send to messenger. so baka ganun? madalas ko tinatag ung mga friends ko sa mga posts/memes na alam ko matatawa sila, nasesend sa messenger nila, wala naman ako plano pag usapan ng masinsinan ung meme, gusto ko lng makita nila lol	dwipdhp	t3_887m47	t1_dwinnsa
juhyuns	Philippines	1509730090	31	English	Tagalog	not me, but my brother cut ties with our father a couple of years ago after Yolanda (long story...) since mataas ang pride ng tatay ko, he's waiting for my brother to make the first move to reconcile. my brother, on the other hand, ran out of fucks to give years ago so he has no intention of making any moves. so every now and then nagttext samin yung stepmother ko hoping to meet with him and magb…	dpaqjuy	t3_7aileu	t3_7aileu
AnakNgKagang	Philippines	1448681467	48	Tagalog	English	If you love your current course, I don't see any reason why you should shift to EE. Ikaw din naman mahihirapan sa huli pag sinunod ko gusto ng parents mo. Good luck!	cxfdy4f	t3_3uih2y	t1_cxf8vn0
jenn4u2luv	Philippines	1525888873	15	English	Tagalog	Last year, my renewal got rejected twice. Only got approved on the 3rd application, after my company raised my salary twice! Also, I have two flatmates who got rejected during visa renewal. Hindi na nag-appeal yung company nila. Ayun, umuwi na sa Pilipinas. End of this month, Iג€™m moving to a new company and my new visa just got approved last week! After 3 years here, this new company will be a …	dyplg5p	t3_8i6lm0	t1_dypkuta
Akoaymaylobo	Philippines	1542363340	48	Tagalog	English	Napikon na ako sa ex ko so kinausap ko siya kanina. Sinabi ko lahat ng ayaw ko sa kanya. *Social climber at pretentious. Feeling niya she deserves all the good things in life (without working for it, sulks when she can't get them). *I'm so unlucky, buti pa si ano binilhan ng bf nya* (Bisch, I'm not gonna buy you a new iphone) *GGSS. Oo na, may hitsura ka pero hindi lang yan ang basehan sa mundo. …	e9t30vv	t3_9xkukc	t3_9xkukc
boomkarakarakas	Philippines	1509976210	41	Tagalog	English	I wanna know more about Anne Curtis incident sa bar though. Like if that news is legit, then sobrang ibang iba yung image niya sa tv and social media. Para kasi siyang down to earth at mabait, pero yung mga sinabi niya dun sa bar incident at yung sinampal niya.....	dpf9vpr	t3_7appyx	t3_7appyx
curricularguidelines	Philippines	1543810780	48	Tagalog	English	Extra tip: Pag aalis kami at walang tao sa bahay, binubuksan namin yung ilaw sa garahe at sala tapos iiwang nakaon yung radio. Just to give an impression that someone is at home.	eazbkqn	t3_a2hrwu	t1_eaz7iw8
damnedwallflower	Philippines	1429612758	37	Tagalog	English	Read my research paper about investing in the stock market. Though may ko pa sya matatapos lol. Joke lang, sayang oras pag binasa mo. Pasang awa nga lang hinahabol ko sa paper ko na yun. Hahaha. Though try reading "How the stock market works" by Michael Becket. Mas ok kapag nagsisimula ka sa pag intindi muna ng system ng stock market. Skip mo nalang yung mga masyadong technical na part. Hindi kai…	cqjhwca	t3_33au85	t3_33au85
nagmamasimasid	Philippines	1496865716	36	Tagalog	English	Dumadami na sila, this is not the first time na naka encounter ako nang ganun ka bastos sa bgc, yung iba sobrang hassle, makikita mo mag bubukas ng bintana ng kotse tapos mag tatapon ng basura sa kalsada. Hay naku.	dile7s9	t3_6fubcb	t1_dile0j5
PH_TheHaymaker	Philippines	1528211356	36	English	Tagalog	Im talking about schools not letting its students out during school hours from 8am-5am. I mean come on parents are expecting their children to be at school sa mga oras n yan. If may mangyaring masama sa mga yan during school hours e d syempre yung eskwelhan pa rin may kasalanan.	e05ijoi	t3_8opntv	t1_e05c6po
kokoBware23	Philippines	1424924959	43	English	Tagalog	masaklap nga, ako nga, yung love kong babae, hindi ko pa nakikita sa personal at steam at dota 2 lang contact namin yet i fell.....at masaklap pa nagkikita cla ng bf niya sa personal =(( god damn it cupido!	coxiawj	t3_2x5s7b	t1_coxi6vy
asoge	Philippines	1521987491	35	English	Tagalog	Isa sa mga TL ng ITO namin nursing grad, manager na. Nasa iyo naman e. Kung may hilig ka sa IT "stuff" at current tech trends ok na yun. Tuwing mag screen ako ng applicants, pipiliin ko ang non-BS degree holder na nahilig mag assemble ng PC, kesa sa BS-IT na graduate na hindi man lang alam kung ano processor ng home PC niya.	dw9bpyh	t3_85elg0	t1_dw90yq7
thana_alvah420	Philippines	1493038640	39	Tagalog	English	Normal lang ba na sa dami ng kaibigan mo karamihan sa kanila gusto mo? I don't like to call it *crush* pero kasi minsan kinikilig talaga ako kapag kasama ko sila. Ang dami mong good friends ang sarap nila i-jowa talaga then you realize mas okay pala silang friends lang. May isa akong gustong-gusto pero same. Mas okay na friends lang kami. Sad life Jin. You can't have everything e isa nga wala ka.…	dgoiob1	t3_6783mj	t3_6783mj
angbataa	Philippines	1495601349	48	English	Tagalog	di naman kailangan bumangon para makapagpost. Ang kailangan mo lang gawin eh kapain kung nasaan ang cellphone, unlock the cellphone, navigate to reach the reddit app, enable mobile data, go to r/ph,browse and comment"	dhyq78b	t3_6cxuu0	t1_dhymwsh
gnutela	Philippines	1510409803	38	Tagalog	English	kaka-umay naman Jollibee ads dito sa reddit. Maybe it's time the mods ban everything about Jollibee. Food's not even that good there. Kumain ako kanina, yung yum burger with cheese, kalahati lang ng cheese ang nakalagay (oo, ni-slice nila sa gitna tapos kalahati lang ang nilagay) then yung palabok, breakfast sausage ang nakalagay na meat tapos walang choppped spring onions! Yung fries, lasang kam…	dpny0m2	t3_7c7yvy	t3_7c7yvy
hiraryakun	Philippines	1487398499	31	English	Tagalog	Hello, I'm a fellow writer. I post my work over at /r/Kwadermo para sa mga interesado. Hindi ako sa showbiz industry tulad mo, pero isa din akong estudyante ng pagsusulat. I've been seeing you post about the 'heroes journey' when someone criticizes how similar lang ang karamihan ng mga teleserye natin. Yes, the monomyth exists. At wala ng tunay na orihinal na ideya sa mundo. Pero, it doesn't disc…	ddw8a1i	t3_5upneh	t1_ddw5x22
g3ralt01	Philippines	1498320748	29	English	Tagalog	IIRC, you'll list your two campuses and under the two campuses you'll list your course. You'll pick the courses from a list they'll provide you sa form. May mga course code yon per campus. And those courses that you picked is ang magiging basis ng threshold kung makakapasok ka sa campus na gusto mo, or at the very least probationary ka. Pwedi ka naman pumili ng ibang course pag time na for confir…	djcfjas	t3_6j8prg	t3_6j8prg
gingangguli	Philippines	1448968135	30	Tagalog	English	Again, like i said to the other guy, ang basis kasi ng 2nd division ay yung application niya for citizenship na 2006 lang nagawa. Ang citizenship ay iba sa residency requirement ayon sa mga kasong nadesisyunan ng korte suprema. Ang sinasabi ng panig ni Poe eh 2005 pa siya naging resident kaya yung residency requirement ay natugunan niya.	cxj04o6	t3_3uzcms	t1_cxizzwk
cesgjo	Philippines	1530105304	30	English	Tagalog	Im not taking a master's degree but this might help. Some schools will gladly send you the list of every subject that a person must take under the given course/degree. That will give you a hint kung ano ba yung scope nun. Pero siyempre iba parin pag mismong sa tao nanggaling ano ba mga pinag-aralan nila ;)	e1djro6	t3_8u8c2g	t1_e1dhvio
faniella	Philippines	1541739641	38	Tagalog	English	I side with your dad tho. Nakakasuka na ang nanay ko especially sa mother side na laging nagbibigay ng relief sa mga, sorry to say it, patapon na kamag anak namin. Tito ko na lasenggo, tito doragista, at tita ko na napakadaming maling desisyon sa buhay hanggang sa maging halos pulubi na. Nakakasawa na tumulong sa mga ganitong tao. At kahit tinutulungan pa namin sila hindi man lang naappreciate an…	e9c9t2i	t3_9vh6iy	t1_e9c98sz
[deleted]	Philippines	1464333947	23	Tagalog	English	Masaya naman, pero hindi rin nappractice ng marami sa atin ang tamang paggamit. Dalamak na ang cyber bullying, phishing, atbp. Hindi rin masyado maalam ang mga tao sa internet security, kaya madali makakuha ng information tungkol sa kanila. Walang masama maging keyboard warriors, lalo na pag pinaglalaban ay sariling opinyon, pero easy-han lang natin. :D Re data engineer: feeling ko kulang lang yu…	d3li6vz	t3_4l5bq6	t1_d3lho4l
Autocorrectthis	Philippines	1512162699	45	English	Tagalog	Ano ba talaga ang tunay na solution sa traffic? Seryosong tanong naghahanap ng seryosong sagot. 1. Traffic cops that are honest? 2. Responsible drivers? 3. Malls on close provinces? Cavite, bulacan, laguna 4. Turn signals and bus lanes? 5. Dashcams?	dqmm88w	t3_7guy6n	t3_7guy6n
juhyuns	Philippines	1505832321	45	Tagalog	English	nakabukas ngayon sa laptop ko yung Resident Evil Vendetta. katatapos lang ng intro. wala akong time mag-games kaya movies about games ang peg ko ngayon. what are your favorite game-to-movie adaptations?	dn7s0ng	t3_711xbv	t3_711xbv
kxitsy	Philippines	1519483745	45	Tagalog	English	Ako na siguro 'yung problema. Tinanong ako ng lasing kong tatay kung galit daw ba ako sakanya. I straight up told him no kasi ayokong kumausap ng lasing. I could've told him na I hate his drinking vice pero who am I to tell him eh ako din naman umiinom.	durb5k5	t3_7zvphf	t3_7zvphf
kingguy459	Philippines	1452663212	21	English	Tagalog	&gt;This thread attempts to catalog the (long) series of events that led to his demise. If I were to try to sum it all up: Gus Ledesma helped start a Philippines team AZK, and grew to starting a Sc2 league: this was big news because the Philippines is a really big potential eSports market, but is relatively undervalued (imagine a South American Starcraft Leagueג€”big potential, a lot of wariness …	cywbov4	t3_40kh26	t1_cyw9ebw
promdichinito	Philippines	1478959293	31	Tagalog	English	galing ah? pink pag may hungover puyat or may sakit? as in pink haha. :) ok un ah.. nagtatanong na din kasi ako kasi nga di ba november na.. meron ng.. ahaha.. then pag december.. hirap naman makipagrush.. grabe.. tama mas ok ding magsukat kase.. minsan nakaindicate na ganito ung size pero mali naman pala pag naisukat na.	d9x5jwd	t3_5ck5oo	t1_d9x5f3d
TELLEtubbbies	Philippines	1539962265	20	English	Tagalog	May INTARMED ang UP Manila and yes, as the others have said, UST will be offering a similar program na 6 or 7 years lang straight to med. I know some intarmend students (mostly pisay students) and their advice is to really really really think about choosing such program because there's no going back. Sobrang hirap and "toxic" in terms of load (isisiksik in two years yung undergrad core subjects) …	e82dl9c	t3_8m9o1h	t3_8m9o1h
ertaboy356b	Philippines	1447412780	44	Tagalog	English	Friday the 13th, bumili ako ng yum value meal sa jollibee. Minutes later after leaving jollibee, tumagos yung baso ng coke mula dun sa paper bag na hinahawakan ko. WTH! Na late tuloy ako sa office -_-	cwyrw5b	t3_3snacl	t3_3snacl
mjrsn	Philippines	1460466643	28	English	Tagalog	So the whole apartment's PLDT bills got lost/not delivered/whatever.. and on PLDT's delivery record, it was apparently given to me by their *kartero*. Smh, *mister kartero*, y me. Dami pwede pangalan ilagay dun sa mga bills, yung akin pa napili mo. Ang masakit, bakit ko itatago? aanhin ko PLDT bills nila, possible tissue pagdating ng doom's day?	d1zqhlk	t3_4efeme	t3_4efeme
radioactivesamalamig	Philippines	1549595452	40	Tagalog	English	Patulong naman guys. Anyone knows how to fill up BIR Form 1700? Badtrip HR namin eh, binigyan pa kami ng sakit sa ulo. Din nila naconsolidate yung tax ko from previous employer kahit nagpasa ako ng 2316 galing sa previous employer ko.	efzsram	t3_ao95en	t3_ao95en
syaochan	Philippines	1490848652	31	English	Tagalog	Di ako palapasok na bata noong high school. Sa umaga, inaantabayan ko yung morning line-up (Princess Sara, Cedie) tapos pag hapon naman, nagpapalevel ako ng Battle-Support priestess ko sa Chaos server. Yun ang happiest memory of HS ko: anime, fanfiction.net, at RO. Harinawa, naka-graduate din ako. Pero mga 3 days before the graduation ko na lang nalaman, nung pinahatid ang toga ko at nakita ko an…	dflcpf6	t3_62a30c	t3_62a30c
kvsjob18	Philippines	1528642155	36	English	Tagalog	We usually used SMS pag malapit na malowbatt yung phone, lakas din kasi kumain ng battery yung pag-gamit ng data.. Especially pag walang power bank to charge it.. But yeah ganito na din kadalasan inbox ko, it's either calls or viber/messenger apps ang mahalaga na talaga sa panahon ngayon	e0fmlpc	t3_8pxi69	t3_8pxi69
Gamec0re	Philippines	1438929380	36	Tagalog	English	So OP anong atmosphere ngaun sa inyo ? did you managed to get some friends naman? baka nag jojoke lang naman yung classmate mo. at least alam na nila kung sino ang boss sa classroom hehe.	ctujtgz	t3_3g319v	t3_3g319v
cereseluna	Philippines	1521305380	45	English	Tagalog	Yang mga downvoters at throwaways ang totoong walang magawa sa buhay TBH IMHO. LOL Iג€™ve been there. Downvoting ג€just becauseג€ is frankly a waste of time.	dvuprej	t3_854lb0	t1_dvuor08
Anzire	Philippines	1546750086	33	Tagalog	English	One thing I like about my Post depression, I can better understand the people around me now. 1 year na ako bare minimum mag ayos sa sarili. Minsan hindi na ako nag effort maayos katulad ngayon. Biglang iba na yung way kung paano ako kausapin ng iba ko pinsan. Its bad pero okay lang kasalan ko din ahahahahahahaha. Nag labas lang ng sama ng loob.	edcxnxj	t3_acyrpc	t3_acyrpc
geltamycin	Philippines	1505929622	34	English	Tagalog	Departure hold ata yun. I remember my dad had the same name as someone who was on the lookout. Buti na lang yung middle name niya, iba. We managed to catch our flight but immigration told us to always get a travel clearance before leaving the country. They should have the complete names including middle names. Hirap na panahon ngayon. Tsaka baka mamaya tinatago na ng mga kamag-anak yan sa probins…	dn9qqrs	t3_71amz1	t1_dn9py0g
boob_grabber	Philippines	1373435472	47	English	Tagalog	I don't give a fuck. You came from a poor family? How poor? Tangina lang kung makapagsalita ka kala mo lahat may kakayanan maging katulad mo na maka-ahon. May sadyang mahirap lang kahit gano pa kasipag.	cazj555	t3_1hzcjs	t1_cazgdco
Adrasteia18	Philippines	1522453508	38	Tagalog	English	The pain will go away eventually. It always does. In the long run, mas magandang walk away ka nalang agad kaysa ipilit mo sarili mo. Parang waxing lang yan e. Mas ok na hilahin nb biglaan kaysa unti unti. Rip the bandage. Fucking rip it off.	dwk1b95	t3_88e2w4	t1_dwk10in
Fulltergeist	Philippines	1469698879	23	English	Tagalog	possible reasons? 1. Timing - budget/cost reasons, baka di pa sila makapag-offer kasi aantayin na mag-offer sa iyo at makapagstart ka na sakto sa budget. 2. They have another applicant na kinonsider pero di sila sure, nag-offer sila pero hinihintay kung tatanggapin yung offer nila o hindi. 3. They're looking for other applicants na maisasama sa pinagkomparahan sa iyo, para masabing they chose you…	d5u8ekh	t3_4ux7jo	t1_d5u3ufj
conchaesta	Philippines	1481467363	48	English	Tagalog	Few months after I graduated from uni, napapanaginipan ko pa rin na thesis presentation na namin pero hindi pa tapos yung thesis namin so yung adviser ko galit na galit sa akin. Nagigising ako na nagpapanic pa rin about thesis. Wtf. Haha	db230bw	t3_5hpfk7	t1_db228kk
newMe0109	Philippines	1481461596	22	Tagalog	English	Di ko na sya babalikan, pag binalikan ko sya kulang ang salitang tanga, d nabawasan mahal ko ung dating sya, pero ung ngaun kabaliktaran sya ung pinaka kinamumuhian kong tao ngaun, 5 stages of seperation , if my kakilala kang nag yoyosi or nagyoyosi ka for almost ilang years try mo patangal or tangalin nila un instantly, mas malala dun kasi addiction ung love nag wiwidrawal ka, tipong sinampal ka…	db20ni5	t3_5hphz3	t1_db1z32r
